# Supplementary material
Source: MDPI journal article supplement (https://www.mdpi.com/1424-8247/15/8/1010)
Supplement: s1 [file s1]

# A study on repositioning nalidixic acid *via* lanthanide complexation: Synthesis, characterization, cytotoxicity and DNA/protein binding studies

Ana-Madalina Maciucă<sup>1</sup>, Alexandra-Cristina Munteanu<sup>1\*</sup>, Mirela Mihailă<sup>2</sup>, Mihaela Badea<sup>3</sup>, Rodica Olar<sup>3</sup>, George Mihai Nitulescu<sup>4</sup>, Cristian V. A. Munteanu<sup>5</sup>, and Valentina Uivarosi<sup>1\*</sup>

<sup>1</sup> Department of General and Inorganic Chemistry, Faculty of Pharmacy, Carol Davila University of Medicine and Pharmacy, 6 Traian Vuia St, Bucharest 020956, Romania;

<sup>2</sup> Center of Immunology, Stefan S. Nicolau Institute of Virology, 285 Mihai Bravu Ave, Bucharest 030304, Romania;

<sup>3</sup> Department of Inorganic Chemistry, Faculty of Chemistry, University of Bucharest, 90-92 Panduri Str, Bucharest 050663, Romania;

<sup>4</sup> Department of Pharmaceutical Chemistry, Faculty of Pharmacy, Carol Davila University of Medicine and Pharmacy, 6 Traian Vuia Str, Bucharest 020956, Romania;

<sup>5</sup> Romanian Academy-Institute of Biochemistry (IBAR), 296 Spl. Independenței, 060031 Bucharest, Romania;

\* Correspondence: [alexandra.ticea@umfcd.ro](mailto:alexandra.ticea@umfcd.ro); [valentina.uivarosi@umfcd.ro](mailto:valentina.uivarosi@umfcd.ro)

Tel.: +4-021-318-0742; Fax: +4-021-318-0750.

**Abstract:** "Drug repositioning" is a modern strategy used to uncover new applications for out-of-date drugs. In this context, nalidixic acid, the first member of the quinolone class with limited use today, has been selected to obtain nine new metal complexes with lanthanide cations ( $\text{La}^{3+}$ ,  $\text{Sm}^{3+}$ ,  $\text{Eu}^{3+}$ ,  $\text{Gd}^{3+}$ ,  $\text{Tb}^{3+}$ ); the experimental data suggest that the quinolone acts as a bidentate ligand, binding to the metal ion *via* the keto and carboxylate oxygen atoms, findings that are supported by DFT calculations. The cytotoxic activity of the complexes has been studied using tumoral cell lines, MDA-MB-231 and LoVo, and a normal cell line, HUVEC. Their affinity for DNA and the manner of binding have been tested using UV-Vis spectroscopy and competitive binding studies; our results indicate that major and minor groove-binding play a significant role in these interactions. The affinity towards serum proteins has also been evaluated, the complexes displaying higher affinity towards albumin than apo-transferrin.

**Keywords:** drug repositioning; nalidixic acid; lanthanide ions; anticancer; DNA binding; serum proteins binding.

|                                                                                                                                                                                                                                                                                                                                                                                                                                                                                                                                    |    |
|------------------------------------------------------------------------------------------------------------------------------------------------------------------------------------------------------------------------------------------------------------------------------------------------------------------------------------------------------------------------------------------------------------------------------------------------------------------------------------------------------------------------------------|----|
| <b>Table S1.</b> Wavelengths and absorbance (A) values observed in the UV-Vis-NIR spectra of nalidixic acid and complexes.                                                                                                                                                                                                                                                                                                                                                                                                         | 4  |
| <b>Table S2.</b> IR data (cm <sup>-1</sup> ) and band assignments for nalidixic acid (Nal), sodium salt of nalidixic acid (Nal-Na <sup>+</sup> ) and M(nal) <sub>2</sub> compounds, M= La <sup>3+</sup> , Sm <sup>3+</sup> , Eu <sup>3+</sup> , Gd <sup>3+</sup> , Tb <sup>3+</sup> .                                                                                                                                                                                                                                              | 5  |
| <b>Table S3.</b> IR data (cm <sup>-1</sup> ) and band assignments for nalidixic acid (Nal), sodium salt of nalidixic acid (Nal-Na <sup>+</sup> ) and M(nal) <sub>3</sub> compounds, M= La <sup>3+</sup> , Eu <sup>3+</sup> , Gd <sup>3+</sup> , Tb <sup>3+</sup> .                                                                                                                                                                                                                                                                 | 6  |
| <b>Figure S1.</b> Experimental and predicted vibrational spectra of nalidixic acid and its M(nal) <sub>2</sub> and M(nal) <sub>3</sub> metal complexes.                                                                                                                                                                                                                                                                                                                                                                            | 7  |
| <b>Figure S2.</b> Mass spectra for the synthesized complexes: <b>A.</b> La(nal) <sub>2</sub> ; <b>B.</b> Sm(nal) <sub>2</sub> ; <b>C.</b> Eu(nal) <sub>2</sub> ; <b>D.</b> Gd(nal) <sub>2</sub> ; <b>E.</b> Tb(nal) <sub>2</sub> ; <b>F.</b> La(nal) <sub>3</sub> ; <b>G.</b> Eu(nal) <sub>3</sub> ; <b>H.</b> Gd(nal) <sub>3</sub> ; <b>I.</b> Tb(nal) <sub>3</sub> .                                                                                                                                                             | 14 |
| <b>Figure S3.</b> TG, DTG and DTA curves for the M(nal) <sub>2</sub> complexes, M= La <sup>3+</sup> , Sm <sup>3+</sup> , Eu <sup>3+</sup> , Gd <sup>3+</sup> , Tb <sup>3+</sup> .                                                                                                                                                                                                                                                                                                                                                  | 23 |
| <b>Table S4.</b> Thermal decomposition data (in air flow) for the M(nal) <sub>2</sub> complexes, M= La <sup>3+</sup> , Sm <sup>3+</sup> , Eu <sup>3+</sup> , Gd <sup>3+</sup> , Tb <sup>3+</sup> .                                                                                                                                                                                                                                                                                                                                 | 24 |
| <b>Figure S4.</b> TG, DTG and DTA curves for the M(nal) <sub>3</sub> complexes, M= La <sup>3+</sup> , Sm <sup>3+</sup> , Eu <sup>3+</sup> , Gd <sup>3+</sup> , Tb <sup>3+</sup> .                                                                                                                                                                                                                                                                                                                                                  | 25 |
| <b>Table S5.</b> Thermal decomposition data (in air flow) for the M(nal) <sub>3</sub> complexes, M= La <sup>3+</sup> , Eu <sup>3+</sup> , Gd <sup>3+</sup> , Tb <sup>3+</sup> .                                                                                                                                                                                                                                                                                                                                                    | 25 |
| <b>Figure S5.</b> <sup>1</sup> H-NMR spectrum of nalidixic acid.                                                                                                                                                                                                                                                                                                                                                                                                                                                                   | 26 |
| <b>Figure S6.</b> <sup>1</sup> H-NMR spectrum of La(nal) <sub>3</sub> .                                                                                                                                                                                                                                                                                                                                                                                                                                                            | 26 |
| <b>Table S6.</b> Geometric parameters: bond lengths, bond angles, dihedral angles, charge density, total energy of M(nal) <sub>2</sub> and M(nal) <sub>3</sub> .                                                                                                                                                                                                                                                                                                                                                                   | 27 |
| <b>Table S7.</b> IR selected data (experimental vs. predicted) for the optimized structures of Eu(nal) <sub>2</sub> and Eu(nal) <sub>3</sub> .                                                                                                                                                                                                                                                                                                                                                                                     | 32 |
| <b>Figure S7.</b> Experimental and predicted electronic spectra of nalidixic acid and its metal complexes.                                                                                                                                                                                                                                                                                                                                                                                                                         | 32 |
| <b>Table S8.</b> UV-Vis spectral data for nalidixic acid and complexes (experimental vs. predicted).                                                                                                                                                                                                                                                                                                                                                                                                                               | 35 |
| <b>Figure S8.</b> Cytotoxicity of M(nal) <sub>2</sub> (M= La <sup>3+</sup> , Sm <sup>3+</sup> , Eu <sup>3+</sup> , Gd <sup>3+</sup> , Tb <sup>3+</sup> ) and M(nal) <sub>3</sub> (M= La <sup>3+</sup> , Eu <sup>3+</sup> , Gd <sup>3+</sup> , Tb <sup>3+</sup> ) complexes tested on the following cell lines: <b>A.</b> HUVEC - 24h, <b>B.</b> HUVEC- 48h, <b>C.</b> LoVo – 24h, <b>D.</b> LoVo-48h, <b>E.</b> MDA-MB 231- 24h and <b>F.</b> MDA-MB 231- 48h.                                                                     | 36 |
| <b>Figure S9.</b> Graphical representations of normalized cell viability vs. log(Concentration). Concentrations were expressed in μM and transformed to the corresponding logarithmic values. Data were normalized against the smallest value of cell viability in this data set, corresponding to cisplatin, and the control corresponding to untreated cells. Results were plotted in GraphPad Prism 8.0.1 using the built-in equation Nonlinear regression (curve fit) – log(inhibitor) vs. normalized response variable slope. | 37 |

|                                                                                                                                                                                                                                                                                                                                                                                     |    |
|-------------------------------------------------------------------------------------------------------------------------------------------------------------------------------------------------------------------------------------------------------------------------------------------------------------------------------------------------------------------------------------|----|
| <b>Figure S10.</b> Stability assay: UV-vis spectra of the complexes in DMSO-TrisHCl buffer mixture (5 mM Tris-HCl/ 50 mM NaCl, pH 7.4).                                                                                                                                                                                                                                             | 40 |
| <b>Table S9.</b> Absorbances of tested compounds in UV-Vis, in DMSO-TrisHCl buffer, [compound]= 20 $\mu$ M.                                                                                                                                                                                                                                                                         | 42 |
| <b>Figure S11.</b> Absorption spectra of the tested compounds in the absence and presence of increasing amounts of DNA. [compound] = 20 $\mu$ M; [DNA] = 0, 5, 10, 15, 20, 25, 30, 35, 40 $\mu$ M. The arrows show the absorption changes upon increasing the DNA concentration.                                                                                                    | 43 |
| <b>Figure S12.</b> Graphical representations of the DNA-binding constants ( $K_b$ ) for systems containing [compound] = 20 $\mu$ M; [DNA] = 5, 10, 15, 20, 25, 30, 35, 40 $\mu$ M. $K_b$ values were calculated using Equation 2 in OriginPro® 2018. Outliers are represented on the graphs as red data points.                                                                     | 45 |
| <b>Figure S13.</b> Fluorescence spectra of the EB - DNA system in the absence and presence of increasing amounts of the tested compounds. $\lambda_{ex}$ = 500 nm, [EB] = 2 $\mu$ M, [DNA] = 10 $\mu$ M, [compound] = 0, 5, 10, 15, 20, 25, 30, 35, 40 $\mu$ M. Arrows indicate the changes in fluorescence intensities upon increasing the concentrations of the tested compounds. | 47 |
| <b>Figure S14.</b> Graphical representations of the $K_{SV}$ constants for systems containing [EB] = 2 $\mu$ M, [DNA] = 10 $\mu$ M, [compound] = 5, 10, 15, 20, 25, 30, 35, 40 $\mu$ M. $K_{SV}$ values were calculated using Equation 3 in OriginPro® 2018. Outliers are represented on the graphs as red data points.                                                             | 49 |
| <b>Figure S15.</b> Graphical representation of the $K_{50}$ constants for systems containing [EB] = 2 $\mu$ M, [DNA] = 10 $\mu$ M, [compound] = 5, 10, 15, 20, 25, 30, 35, 40 $\mu$ M. $K_{50}$ values were calculated using Equation 3 in OriginPro® 2018. Outliers are represented on the graphs as red data points.                                                              | 51 |
| <b>Figure S16.</b> Changes in fluorescence intensity of free HSA <i>vs.</i> compound-HSA systems; the black arrows indicate a decrease of the intensity upon the addition of increasing amounts of compound; [HSA] = 2.5 $\mu$ M, [compound] = 0, 1, 2, 3, 4, 5, 6, 7, 8 $\mu$ M.                                                                                                   | 53 |
| <b>Figure S17.</b> Changes in fluorescence intensity of free apo-Tf <i>vs.</i> compound-apo-Tf systems; the black arrows indicate a decrease of the intensity upon the addition of increasing amounts of compound. [apo-Tf] = 1 $\mu$ M, [compound] = 0, 1, 2, 3, 4, 5, 6, 7, 8 $\mu$ M.                                                                                            | 55 |
| <b>Figure S18.</b> Variation of the HSA fluorescence peak area upon adding increasing amounts of the studied compounds. [HSA] = 2.5 $\mu$ M, [compound] = 0, 1, 2, 3, 4, 5, 6, 7, 8 $\mu$ M.                                                                                                                                                                                        | 57 |
| <b>Figure S19.</b> Variation of the apo-Tf fluorescence peak area upon adding increasing amounts of the studied compounds. [apo-Tf] = 1 $\mu$ M, [compound] = 0, 1, 2, 3, 4, 5, 6, 7, 8 $\mu$ M.                                                                                                                                                                                    | 59 |
| <b>Figure S20.</b> Classical (left) and modified (right) Stern-Volmer plots for each of the HSA interaction studies.                                                                                                                                                                                                                                                                | 61 |
| <b>Figure S21.</b> Classical (left) and modified (right) Stern-Volmer plots for the apo-Tf interaction assay                                                                                                                                                                                                                                                                        | 65 |
| <b>Figure S22.</b> Representation of $K_a$ and $K_d$ constants for each of the studied compound-HSA systems.                                                                                                                                                                                                                                                                        | 69 |
| <b>Figure S23.</b> Representation of $K_a$ and $K_d$ constants for each of the studied compound-apo-Tf systems.                                                                                                                                                                                                                                                                     | 73 |
| <b>Figure S24.</b> Synchronous spectra for the HSA interaction systems recorded at $\Delta\lambda$ = 15 nm. [HSA] = 2.5 $\mu$ M, [compound] = 0, 1, 2, 3, 4, 5, 6, 7, 8 $\mu$ M.                                                                                                                                                                                                    | 77 |
| <b>Figure S25.</b> Synchronous spectra for the HSA interaction systems recorded at $\Delta\lambda$ = 60 nm. [HSA] = 2.5 $\mu$ M, [compound] = 0, 1, 2, 3, 4, 5, 6, 7, 8 $\mu$ M.                                                                                                                                                                                                    | 79 |
| <b>Figure S26.</b> Synchronous spectra of the tested compounds - apo-Tf systems recorded at $\Delta\lambda$ =15 nm. [apo-Tf] = 1 $\mu$ M, [compound] = 0, 1, 2, 3, 4, 5, 6, 7, 8 $\mu$ M.                                                                                                                                                                                           | 80 |
| <b>Figure S27.</b> Synchronous spectra of the tested compounds - apo-Tf interaction systems recorded at $\Delta\lambda$ =60 nm. [apo-Tf] = 1 $\mu$ M, [compound] = 0, 1, 2, 3, 4, 5, 6, 7, 8 $\mu$ M.                                                                                                                                                                               | 83 |

**Table S1.** Wavelengths and absorbance (A) values observed in the UV-Vis-NIR spectra of nalidixic acid and complexes.

| Compus                     | Nalidixic acid |       |       |       |       |       |       |        |       |       |
|----------------------------|----------------|-------|-------|-------|-------|-------|-------|--------|-------|-------|
| $\lambda(\text{nm})$       | 255            | -     | 315   | -     | -     | -     | 1385  | 1670   | -     | -     |
| A                          | 0.757          | -     | 0.829 | -     | -     | -     | 0.089 | 0.1846 | -     | -     |
| <b>La(nal)<sub>2</sub></b> |                |       |       |       |       |       |       |        |       |       |
| $\lambda(\text{nm})$       | 260            | -     | 335   | -     | -     | -     | -     | 1670   | 1935  | -     |
| A                          | 0.924          | -     | 0.982 | -     | -     | -     | -     | 0.114  | 0.198 | -     |
| <b>Sm(nal)<sub>2</sub></b> |                |       |       |       |       |       |       |        |       |       |
| $\lambda(\text{nm})$       | 250            | -     | 320   | 685   | 1090  | 1245  | 1395  | 1500   | 1940  | -     |
| A                          | 1.009          | -     | 1.054 | 0.164 | 0.153 | 0.181 | 0.187 | 0.187  | 0.260 | -     |
| <b>Eu(nal)<sub>2</sub></b> |                |       |       |       |       |       |       |        |       |       |
| $\lambda(\text{nm})$       | 265            | -     | 340   | -     | -     | -     | 1455  | 1675   | 1935  | -     |
| A                          | 0.425          | -     | 0.558 | -     | -     | -     | 0.132 | 0.150  | 0.272 | -     |
| <b>Gd(nal)<sub>2</sub></b> |                |       |       |       |       |       |       |        |       |       |
| $\lambda(\text{nm})$       | 255            | -     | 330   | 685   | -     | -     | 1455  | 1675   | 1935  | -     |
| A                          | 0.907          | -     | 1.010 | 0.134 | -     | -     | 0.128 | 0.145  | 0.247 | -     |
| <b>Tb(nal)<sub>2</sub></b> |                |       |       |       |       |       |       |        |       |       |
| $\lambda(\text{nm})$       | 265            | -     | 345   | 685   | -     | -     | 1455  | 1680   | 1940  | -     |
| A                          | 0.626          | -     | 0.769 | 0.275 | -     | -     | 0.238 | 0.253  | 0.385 | -     |
| <b>La(nal)<sub>3</sub></b> |                |       |       |       |       |       |       |        |       |       |
| $\lambda(\text{nm})$       | 255            | -     | 330   | -     | -     | -     | 1455  | 1670   | 1945  | -     |
| A                          | 0.948          | -     | 1.023 | -     | -     | -     | 0.121 | 0.135  | 0.269 | -     |
| <b>Eu(nal)<sub>3</sub></b> |                |       |       |       |       |       |       |        |       |       |
| $\lambda(\text{nm})$       | 260            | -     | 335   | -     | -     | -     | 1445  | 1670   | 1945  | -     |
| A                          | 0.304          | -     | 0.460 | -     | -     | -     | 0.116 | 0.153  | 0.275 | -     |
| <b>Gd(nal)<sub>3</sub></b> |                |       |       |       |       |       |       |        |       |       |
| $\lambda(\text{nm})$       | 255            | -     | 325   | 685   | -     | -     | -     | 1670   | 1925  | 1950  |
| A                          | 0.993          | -     | 1.049 | 0.279 | -     | -     | -     | 0.275  | 0.367 | 0.363 |
| <b>Tb(nal)<sub>3</sub></b> |                |       |       |       |       |       |       |        |       |       |
| $\lambda(\text{nm})$       | 245            | 280   | 355   | 685   | -     | -     | 1440  | 1670   | 1925  | 1940  |
| A                          | 0.751          | 0.829 | 0.922 | 0.118 | -     | -     | 0.106 | 0.147  | 0.264 | 0.261 |



**Table S2.** IR data (cm<sup>-1</sup>) and band assignments for nalidixic acid (Nal) , sodium salt of nalidixic acid (Nal-Na<sup>+</sup>) and M(nal)<sub>2</sub> compounds, M= La<sup>3+</sup>, Sm<sup>3+</sup>, Eu<sup>3+</sup>, Gd<sup>3+</sup>, Tb<sup>3+</sup>.

| Nal                                                         | Nal-Na <sup>+</sup>                                                  | La(nal) <sub>2</sub>                    | Sm(nal) <sub>2</sub>                       | Eu(nal) <sub>2</sub>             | Gd(nal) <sub>2</sub>                      | Tb(nal) <sub>2</sub>                      | Assignments                                                |
|-------------------------------------------------------------|----------------------------------------------------------------------|-----------------------------------------|--------------------------------------------|----------------------------------|-------------------------------------------|-------------------------------------------|------------------------------------------------------------|
| -                                                           | 3376 wb                                                              | 3725 vw<br>3399 w                       | 3649 w<br>3420 wb                          | 3395 wn                          | 3377 wb                                   | 3397 wb                                   | v(O-H);<br>COOH,<br>H <sub>2</sub> O                       |
| 3044 w                                                      | -                                                                    | 3056 w                                  | -                                          | 3068 w                           | -                                         | -                                         | Aromatic<br>v(C-H)                                         |
| 2984 w<br>2946 w                                            | 2923 w                                                               | 2974 w<br>2925 w                        | -                                          | 2981 w<br>2931 w                 | 2981 w<br>2931 w                          | 2981 w<br>2932 w                          | v (CH <sub>3</sub> -<br>CH <sub>2</sub> )                  |
| 1707 s                                                      | -                                                                    | -                                       | -                                          | -                                | -                                         | -                                         | v(C=O);<br>COOH                                            |
| -                                                           | 1632 vs                                                              | 1618                                    | 1616                                       | 1615                             | 1614                                      | 1615                                      | v as (COO <sup>-</sup> )                                   |
| 1613 s                                                      | 1606                                                                 | 1570                                    | 1568 s                                     | 1567 s                           | 1567 s                                    | 1568 s                                    | Pyridonic<br>v(C=O)                                        |
| 1561                                                        | 1535 m                                                               | 1524                                    | 1523 s                                     | 1523 s                           | 1523s                                     | 1523 s                                    | Pyridonic<br>v (C-N)                                       |
| 1517                                                        | 1496 m                                                               | 1499 m                                  | 1500m                                      | 1499 m                           | 1499 m                                    | 1500 m                                    | v (C=C)                                                    |
| 1469 s<br>1442 w                                            | 1391 s                                                               | 1348 m                                  | 1347 m                                     | 1346 s                           | 1346 s                                    | 1347 s                                    | v (-CH);<br>δ (-CH <sub>3</sub> )                          |
| -                                                           | 1438 vs                                                              | 1443 s                                  | 1443 s                                     | 1442 s                           | 1441 s                                    | 1442 s                                    | v s(COO <sup>-</sup> )                                     |
| -                                                           | 194                                                                  | 175                                     | 173                                        | 173                              | 173                                       | 173                                       | Δ= v as<br>(COO <sup>-</sup> )-<br>v s (COO <sup>-</sup> ) |
| 1151 w                                                      | 1130 w                                                               | 1173 w                                  | 1131 m                                     | 1130 m                           | 1130 m                                    | 1131 m                                    | v (C-N)                                                    |
| 1033 w<br>1006                                              | 1035 w                                                               | 1034 w<br>1009                          | 1092 w<br>1050 w                           | 1092 w<br>1049 w                 | 1092 w<br>1050 w                          | 1092 w<br>1050 w                          | δ (-CH <sub>2</sub> )                                      |
| 803 s<br>777 w<br>743w<br>705 m                             | 771 w<br>749 s<br>702 w                                              | 758 m                                   | 781 w<br>757 m<br>704 w                    | 781 w<br>756 m<br>703 w          | 780 w<br>756 s<br>704 w                   | 782 w<br>757 m<br>704 w                   | δ (COO <sup>-</sup> )                                      |
| 656 m<br>634 m<br>539 m<br>504 w<br>485 m<br>455 m<br>424 m | 649 m<br>630 m<br>560 m<br>535 m<br>484 m<br>446 m<br>432 m<br>407 m | 656 m<br>635 w<br>540 m<br>502 m<br>453 | 657 mw<br>635 w<br>541 m<br>458 m<br>422 w | 657 m<br>635 w<br>541 m<br>469 m | 656 m<br>634 w<br>539 m<br>490 m<br>457 w | 658 m<br>635 w<br>542 m<br>492 s<br>446 w | Ring<br>deformation                                        |
|                                                             |                                                                      | 578 m<br>492 m<br>477 w<br>410 s        | 599 m<br>559 m<br>492 s<br>409 s           | 559 m<br>491 s                   | 558 m<br>408 s                            | 602 w<br>559 m<br>469 s<br>407 s          | v (M-O)                                                    |

**Table S3.** IR data (cm<sup>-1</sup>) and band assignments for nalidixic acid (Nal), sodium salt of nalidixic acid (Nal-Na<sup>+</sup>) and M(nal)<sub>3</sub> compounds, M= La<sup>3+</sup>, Eu<sup>3+</sup>, Gd<sup>3+</sup>, Tb<sup>3+</sup>.

| Nal                                                         | Nal-Na <sup>+</sup>                                                  | La(nal) <sub>3</sub>                      | Eu(nal) <sub>3</sub>                     | Gd(nal) <sub>3</sub>                      | Tb(nal) <sub>3</sub>                               | Assignments                                            |
|-------------------------------------------------------------|----------------------------------------------------------------------|-------------------------------------------|------------------------------------------|-------------------------------------------|----------------------------------------------------|--------------------------------------------------------|
| -                                                           | 3376 wb                                                              | 3403 w                                    | 3399 wb                                  | 3436 wb                                   | 3420 wb                                            | v(O-H);<br>COOH, H <sub>2</sub> O                      |
| 3044 w                                                      | -                                                                    | 3060 w                                    | 3061 w                                   | -                                         | 3059 w                                             | Aromatic<br>v(C-H)                                     |
| 2984 w<br>2946 w                                            | 2923 w                                                               | 2972 w                                    | 2971 w<br>2929 w                         | 2968 w                                    | 2970 w<br>2932 w                                   | v (CH <sub>3</sub> -CH <sub>2</sub> )                  |
| 1707 s                                                      | -                                                                    | -                                         | -                                        | -                                         | -                                                  | v(C=O); COOH                                           |
| -                                                           | 1632 vs                                                              | 1614 s                                    | 1615 s                                   | 1615 s                                    | 1614 s                                             | v as(COO <sup>-</sup> )                                |
| 1613 s                                                      | 1606                                                                 | 1557 s                                    | 1558 s                                   | 1559 s                                    | 1559 s                                             | Pyridonic<br>v(C=O)                                    |
| 1517                                                        | 1496 m                                                               | 1499 m                                    | 1499 m                                   | 1499 m                                    | 1499 m                                             | v (C=C)                                                |
| 1469 s                                                      | 1391 s                                                               | 1344 m                                    | 1345 s                                   | 1345 s                                    | 1345 s                                             | v (-CH);<br>δ (-CH <sub>3</sub> )                      |
| 1384 m                                                      | 1362 m                                                               | -                                         | 1380 w                                   | 1378 w                                    | 1378 w                                             | Methyl<br>δ(C-H)                                       |
| -                                                           | 1438 vs                                                              | 1439 s                                    | 1441 s                                   | 1439 s                                    | 1439 s                                             | v s(COO <sup>-</sup> )                                 |
| -                                                           | 194                                                                  | 175                                       | 174                                      | 176                                       | 175                                                | Δ= v as (COO <sup>-</sup> )-<br>v s(COO <sup>-</sup> ) |
| 1293 m                                                      | 1298 m                                                               | 1284 w                                    | 1286 m                                   | 1284 m                                    | 1284 m                                             | δr(-CH <sub>2</sub> )                                  |
| 1151 w                                                      | 1130 w                                                               | 1157 w<br>1129 m                          | 1159 m                                   | 1129 m                                    | 1128 m                                             | v (C-N)                                                |
| 1033 w<br>1006 w                                            | 1035 w                                                               | 1049 w                                    | 1092 w<br>1049 w                         | 1102 w<br>1047 w                          | 1092 w<br>1049 w                                   | δ (-CH <sub>2</sub> )                                  |
| 803 s<br>777 w<br>743 w<br>705 m                            | 771 w<br>749 s<br>702                                                | 786 w<br>754 s<br>704 w                   | 782 w<br>757 m<br>703 w                  | 782 w<br>758 s<br>705 w                   | 783 w<br>758 m<br>704 w                            | δ (COO <sup>-</sup> )                                  |
| 656 m<br>634 m<br>539 m<br>504 m<br>485 s<br>455 m<br>424 w | 649 m<br>630 m<br>560 m<br>535 m<br>484 m<br>446 m<br>432 m<br>407 m | 656 m<br>634 w<br>541 m<br>489 s<br>457 w | 657 m<br>635 w<br>541 m<br>488 s<br>419m | 657 m<br>634 w<br>542 m<br>489 m<br>451 w | 657 m<br>634 w<br>542 m<br>488 s<br>477 s<br>431 w | Ring<br>deformation                                    |
|                                                             |                                                                      | 558 m<br>425 m                            | 463 w<br>433 w<br>402 s                  | 599 m<br>558<br>405 s                     | 590 w<br>558 m<br>403 s                            | v (M-O)                                                |

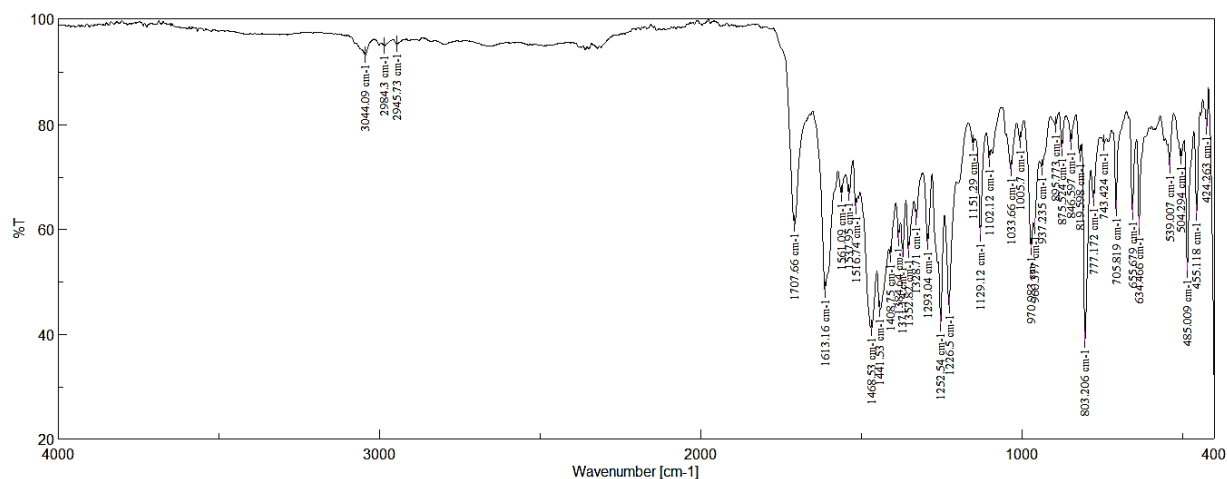

FT-IR spectrum of nalidixic acid

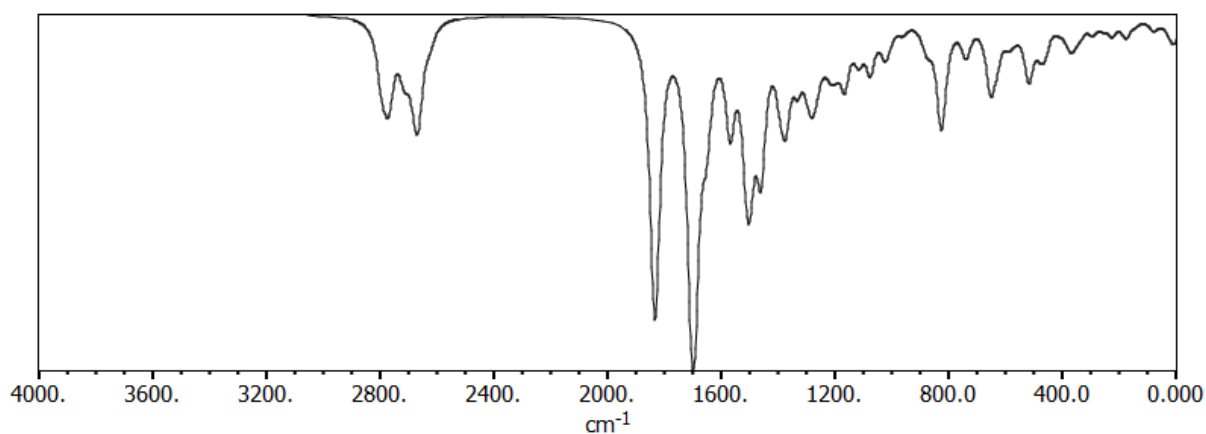

Predicted spectrum of nalidixic acid

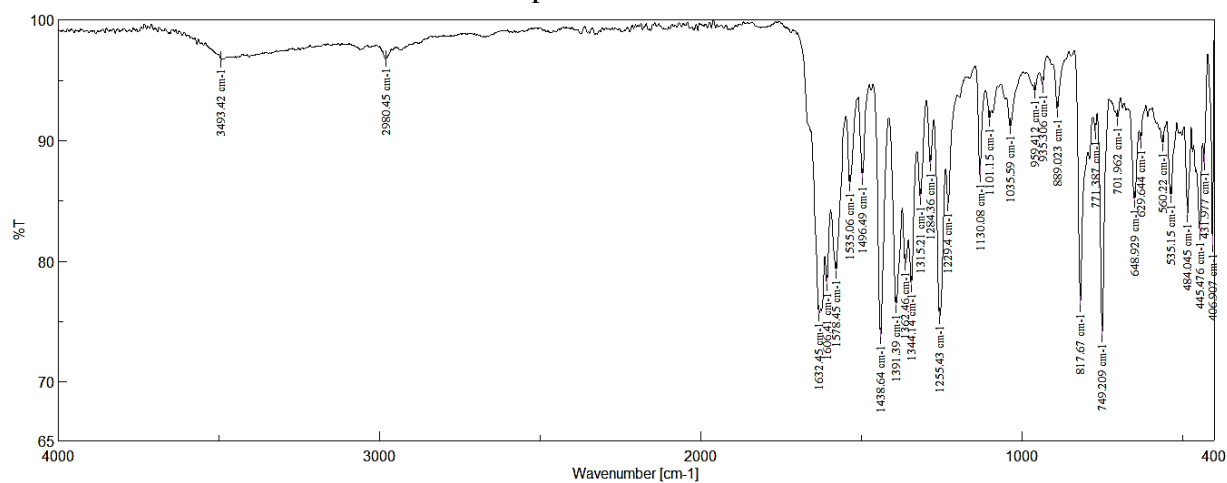

FT-IR spectrum of nalidixic acid sodium salt (NaI·Na<sup>+</sup>)

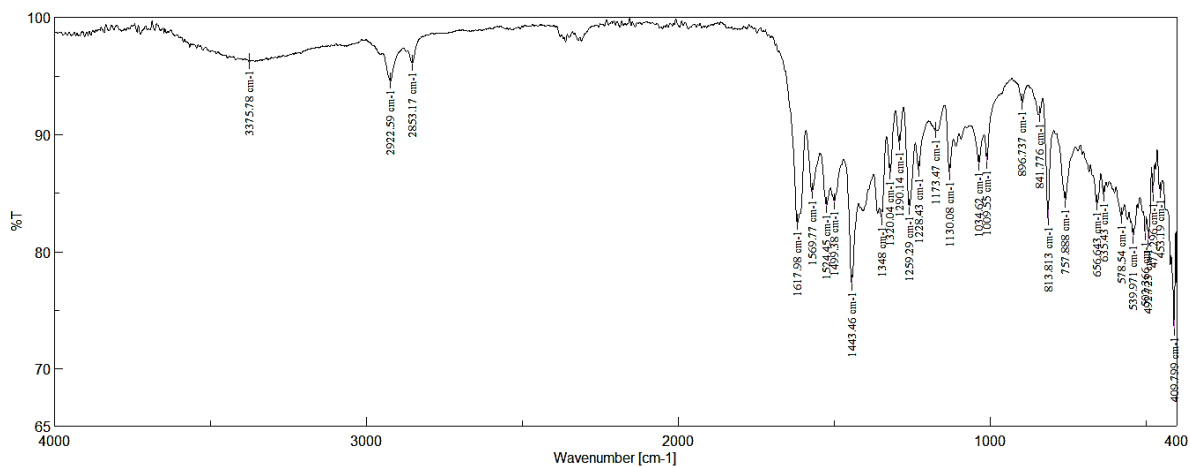

FT-IR spectrum of  $\text{La}(\text{nal})_2$

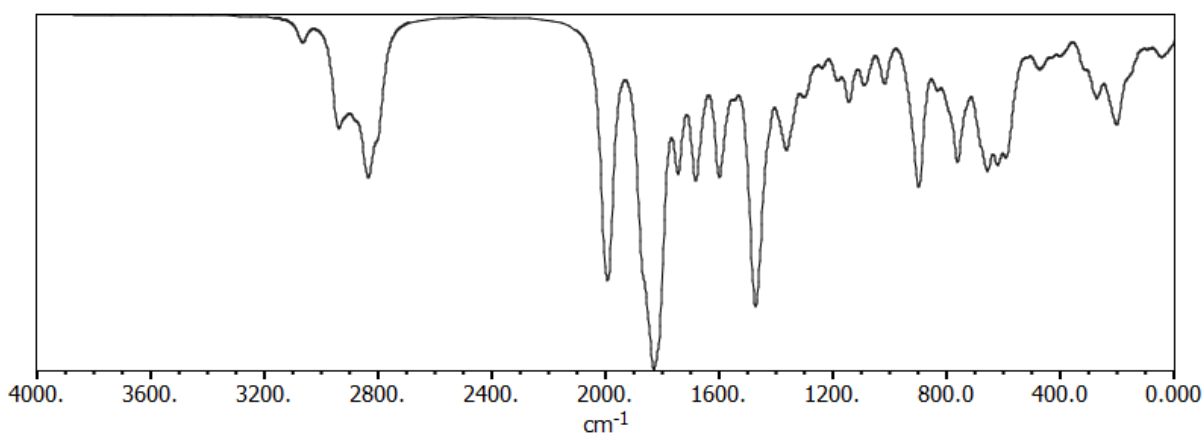

Predicted spectrum of  $\text{La}(\text{nal})_2$

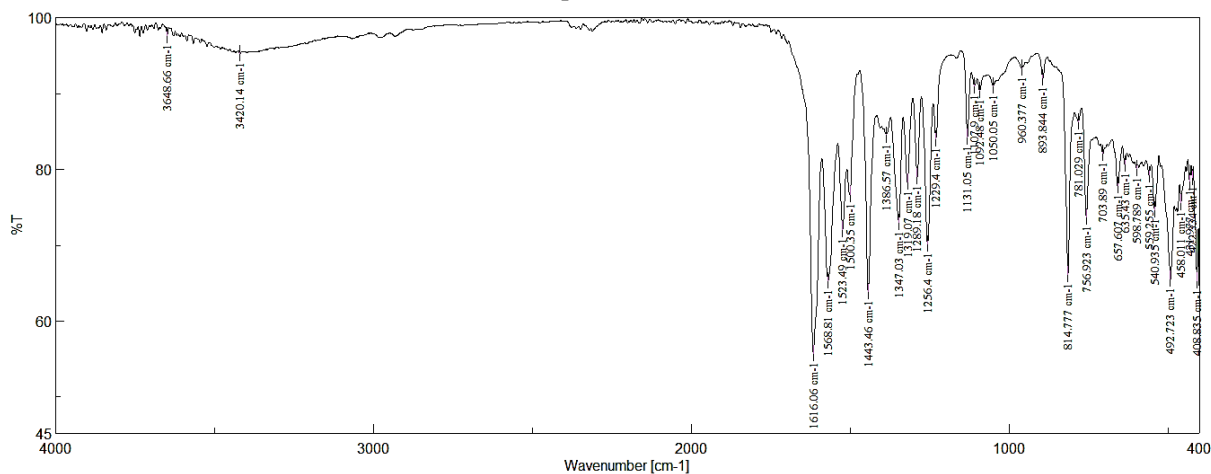

FT-IR spectrum of  $\text{Sm}(\text{nal})_2$

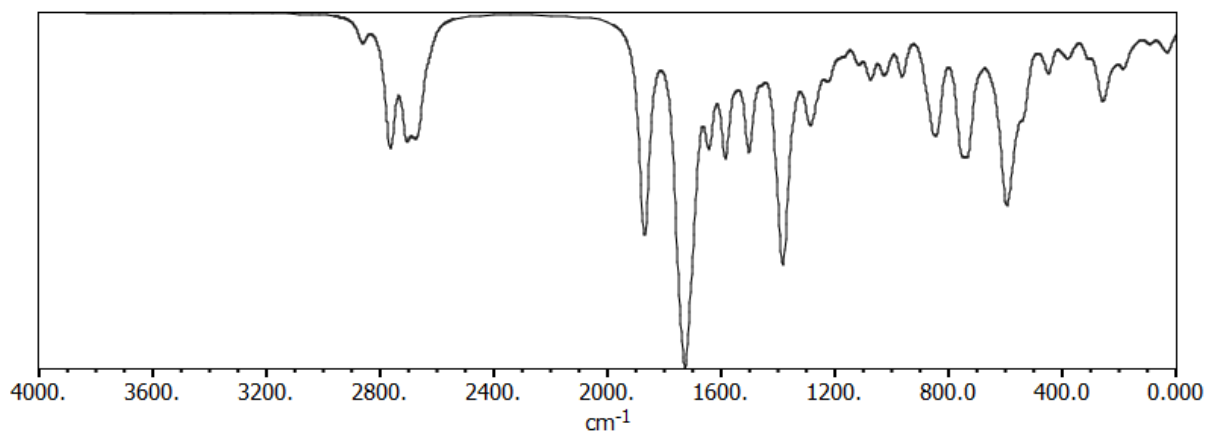

Predicted spectrum of  $\text{Sm}(\text{nal})_2$

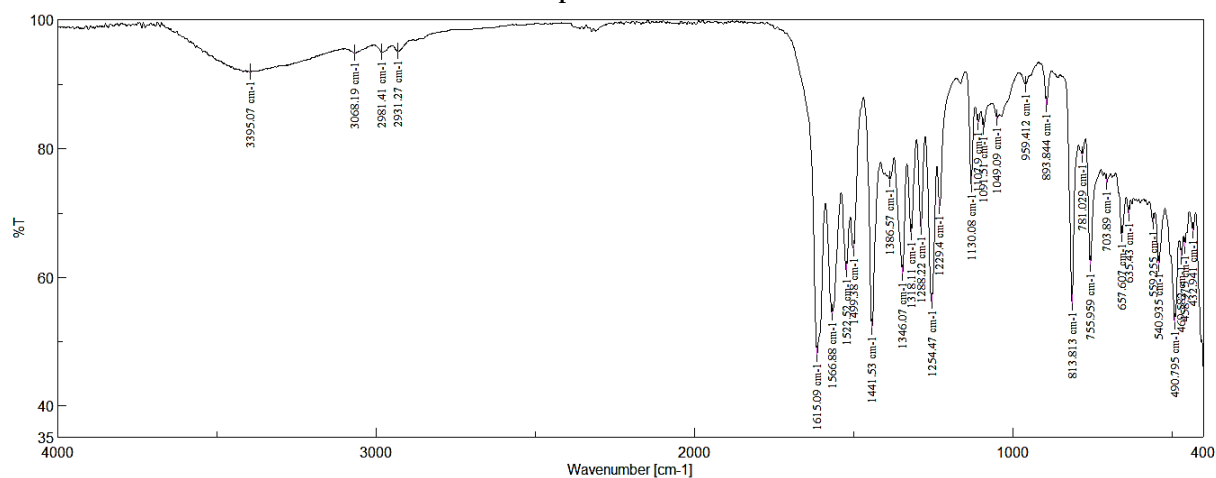

FT-IR spectrum of  $\text{Eu}(\text{nal})_2$

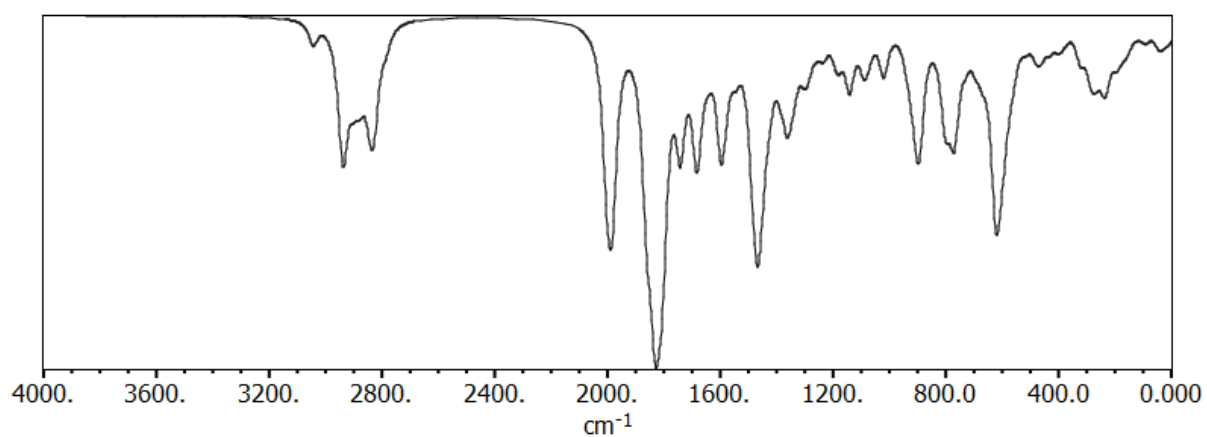

Predicted spectrum of  $\text{Eu}(\text{nal})_2$

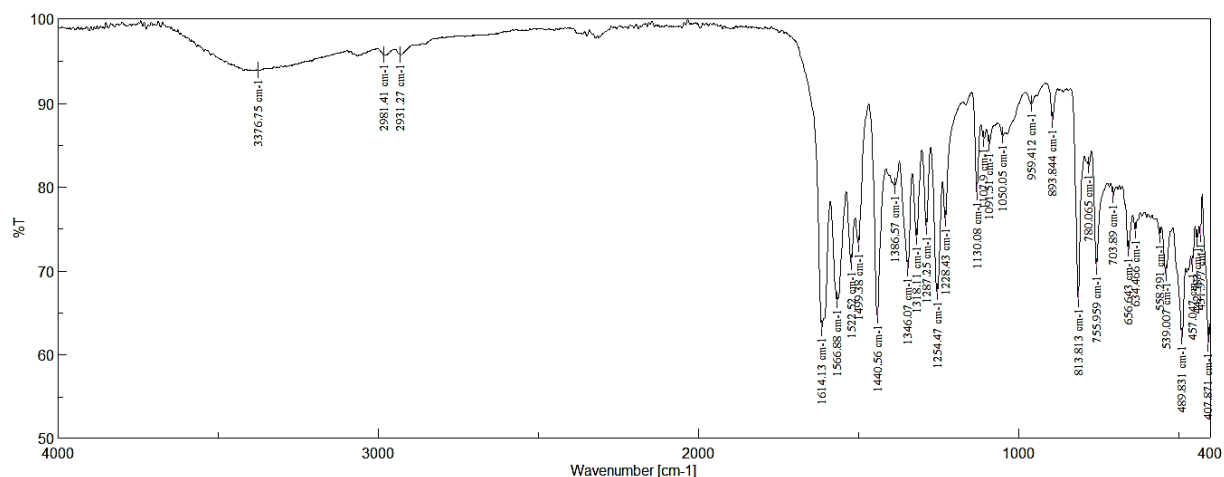

FT-IR spectrum of Gd(nal)<sub>2</sub>

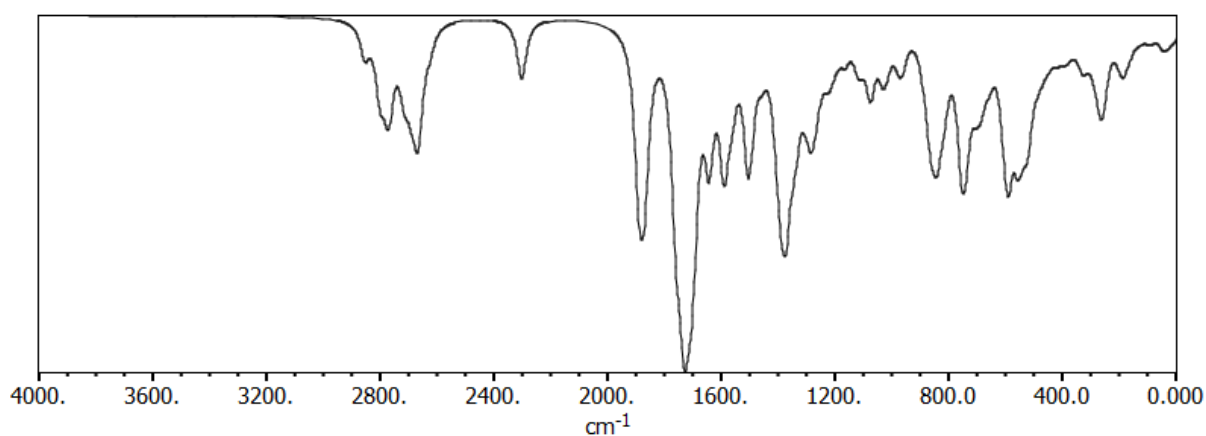

Predicted spectrum of Gd(nal)<sub>2</sub>

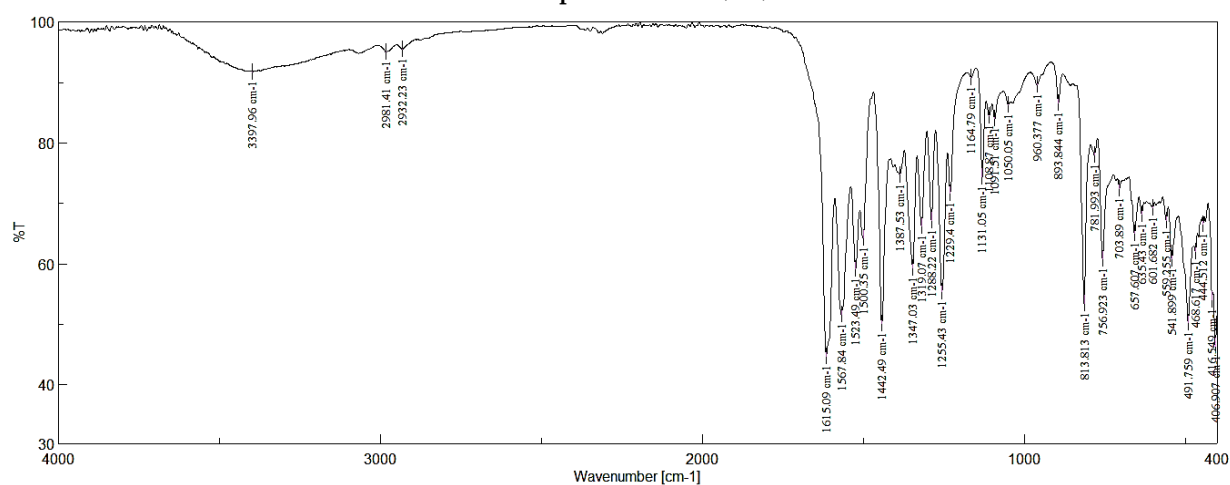

FT-IR spectrum of Tb(nal)<sub>2</sub>

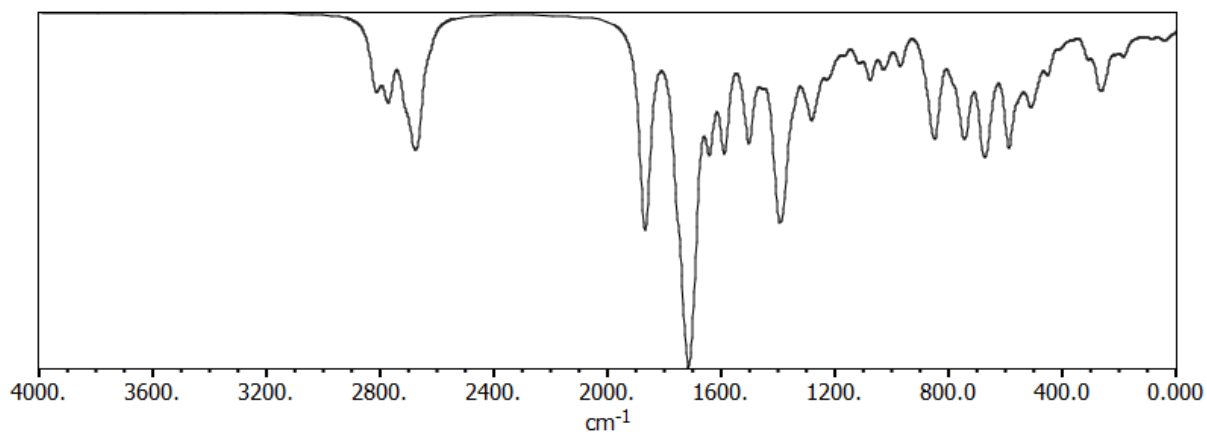

Predicted spectrum of  $\text{Tb}(\text{nal})_2$

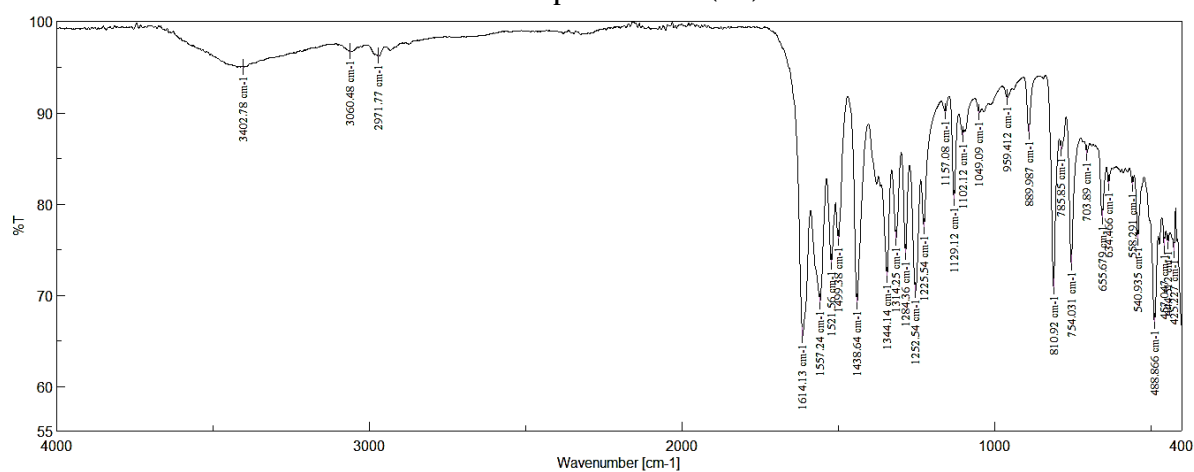

FT-IR spectrum of  $\text{La}(\text{nal})_3$

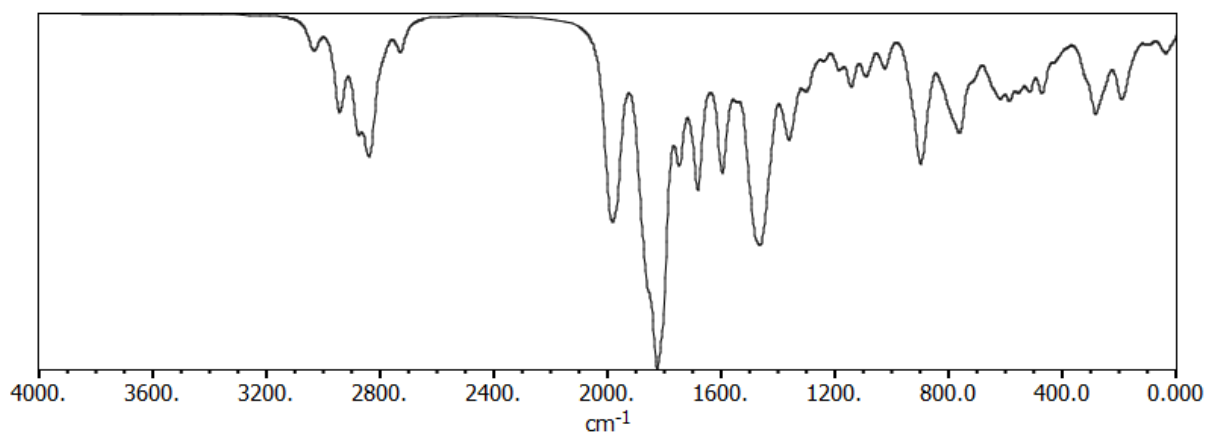

Predicted spectrum of  $\text{La}(\text{nal})_3$

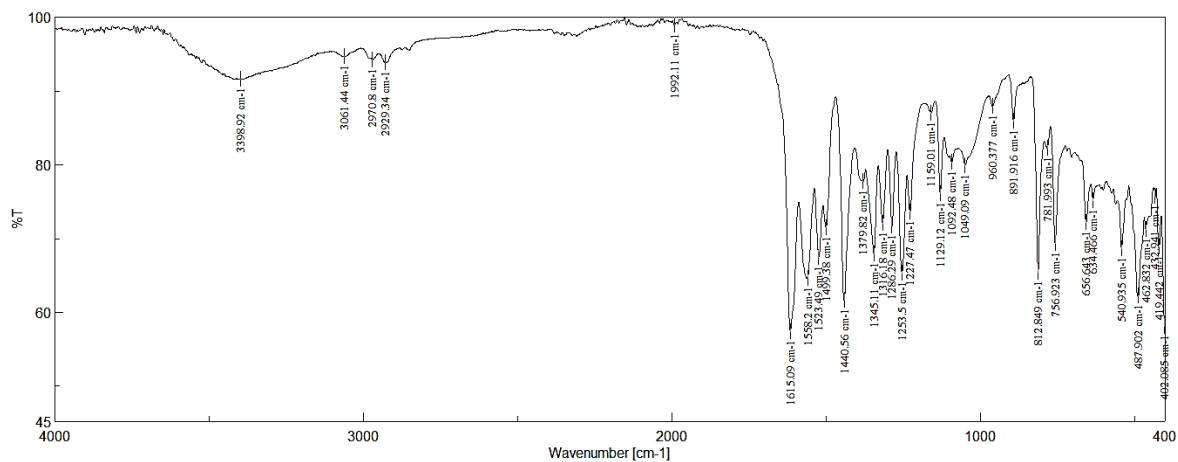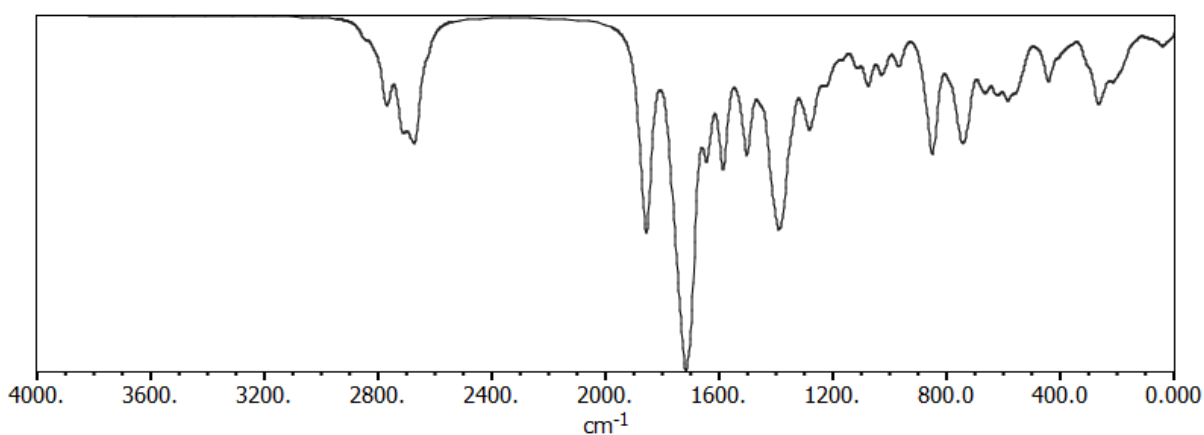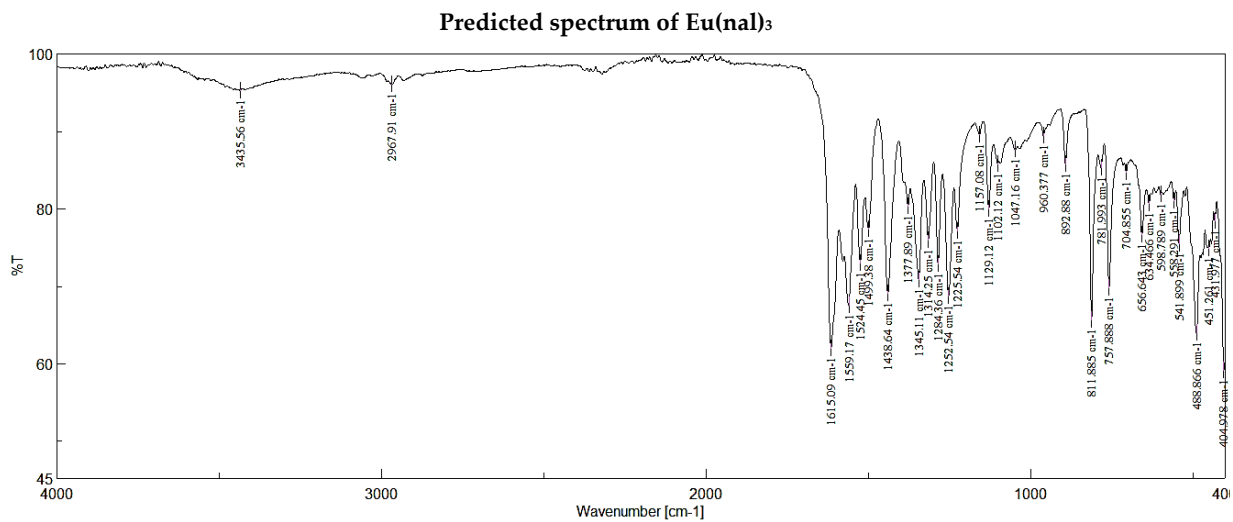



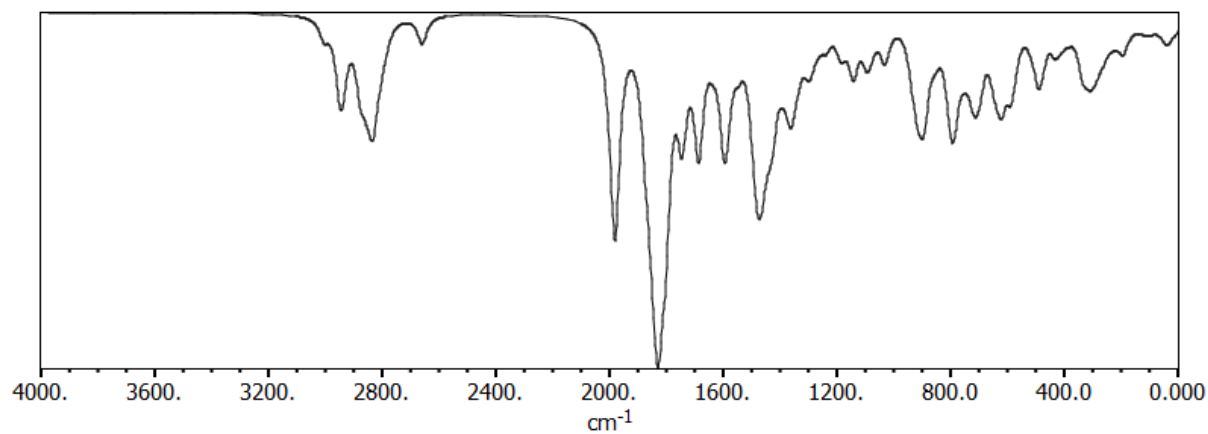

Predicted spectrum of  $Gd(nal)_3$

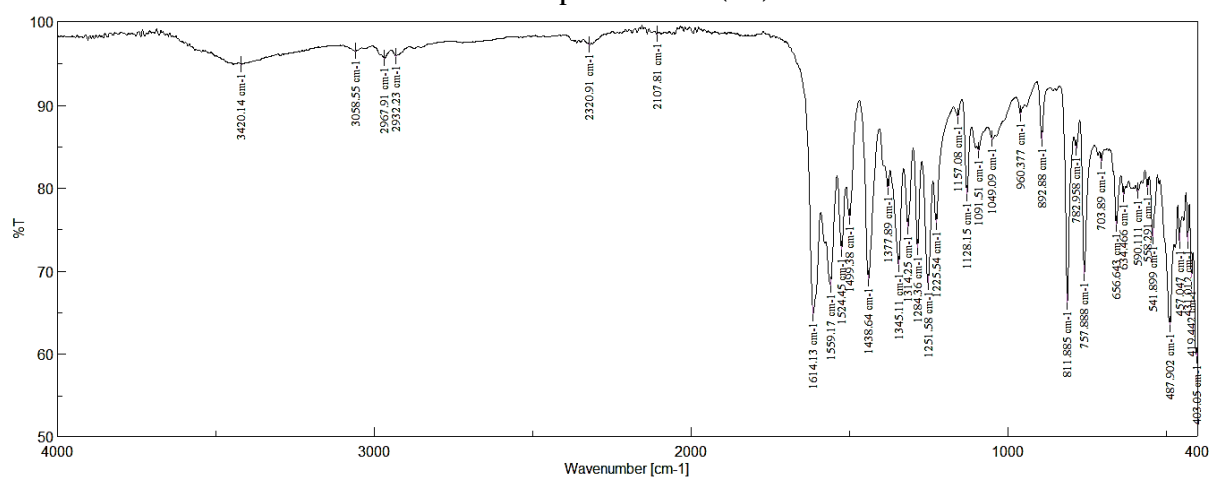

FT-IR spectrum of  $Tb(nal)_3$

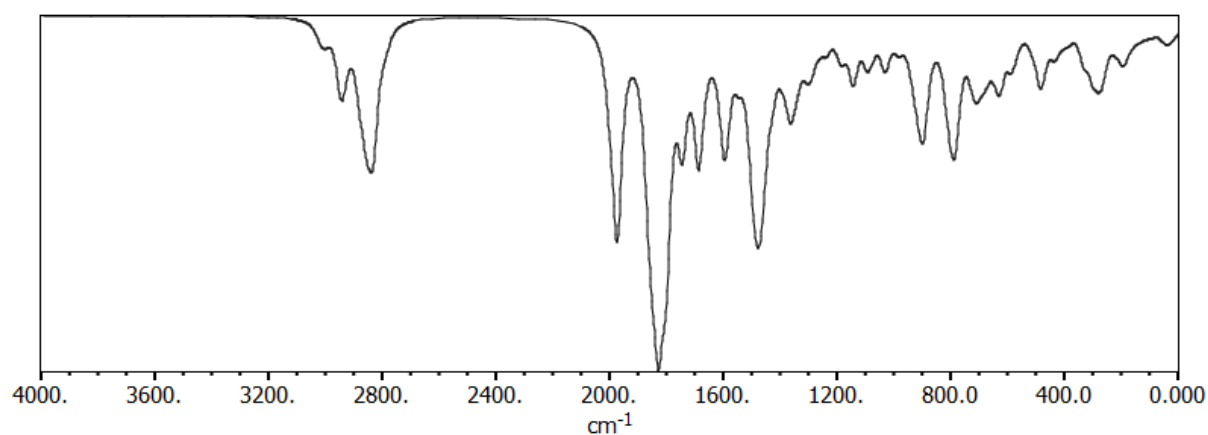

Predicted spectrum of  $Tb(nal)_3$

**Figure S1.** Experimental and predicted vibrational spectra of nalidixic acid and its  $M(nal)_2$  and  $M(nal)_3$  metal complexes.

A.

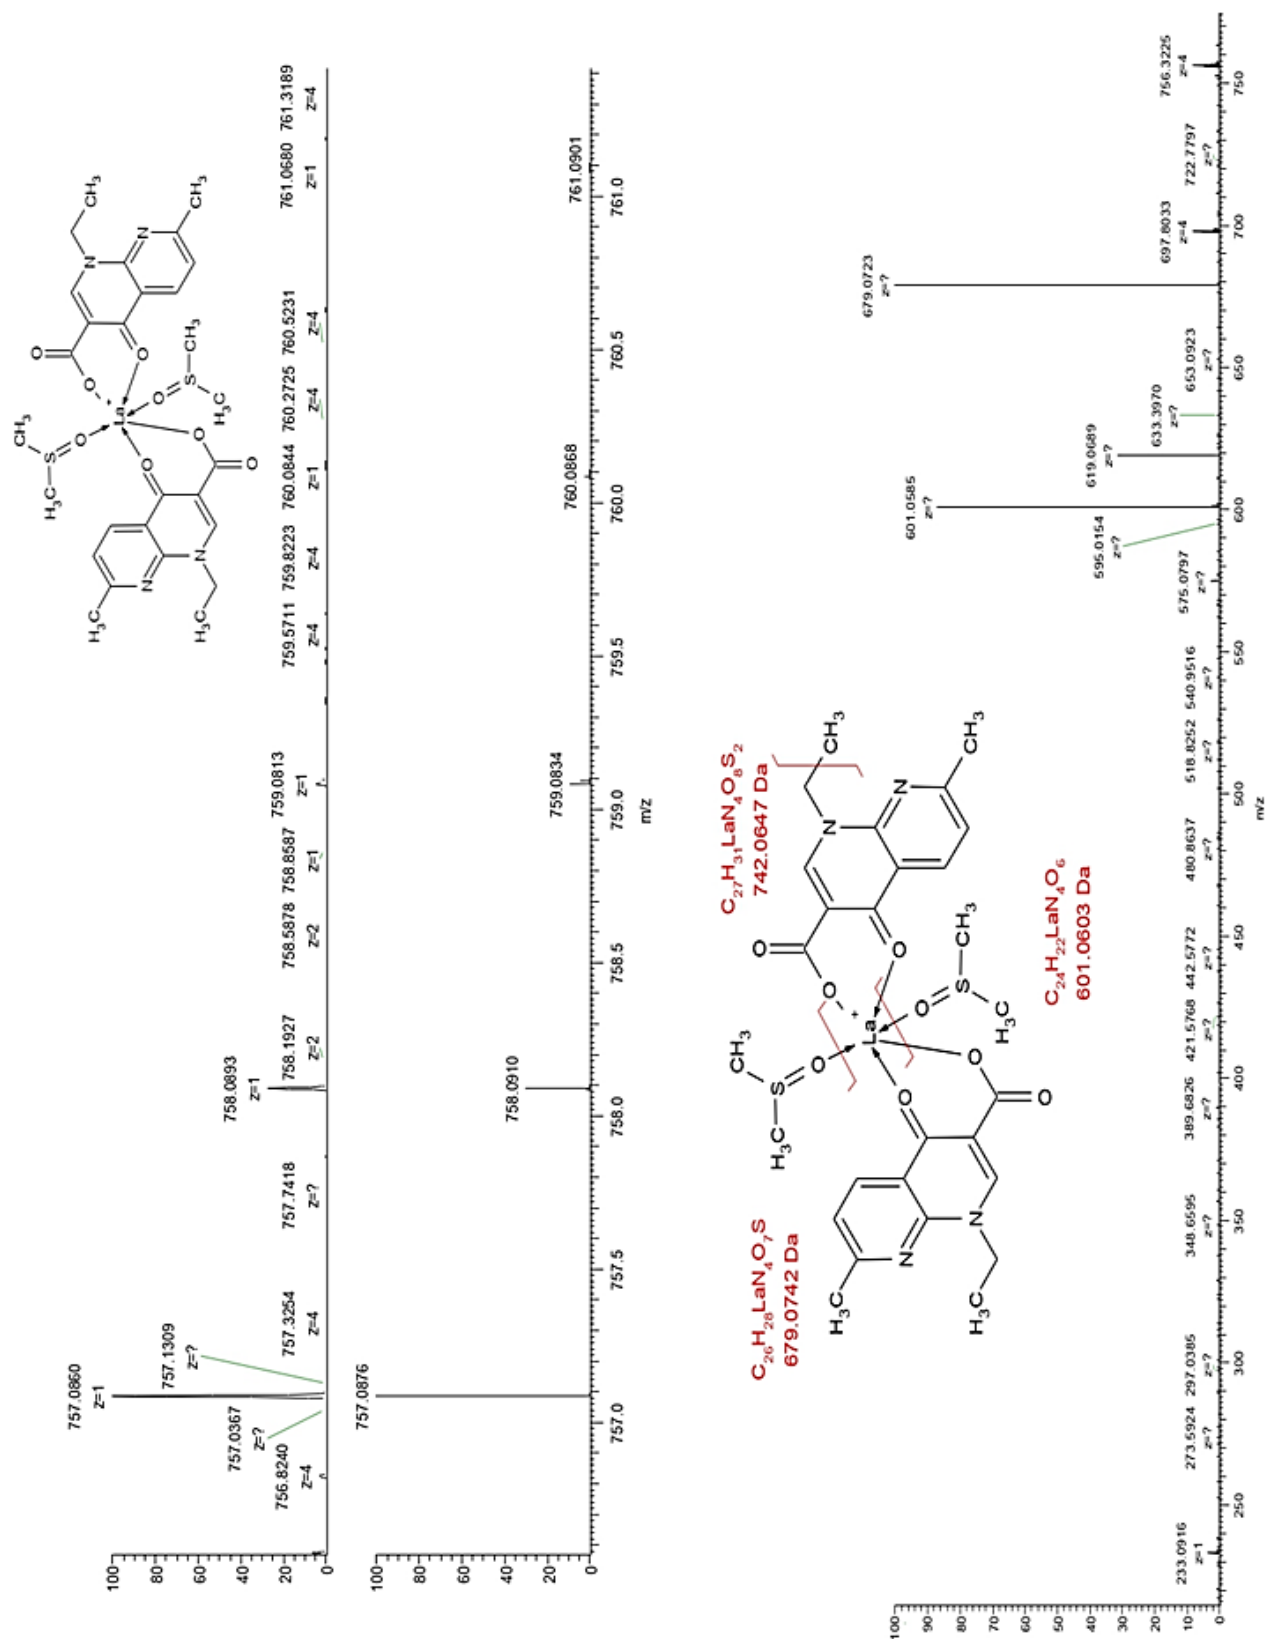

B.

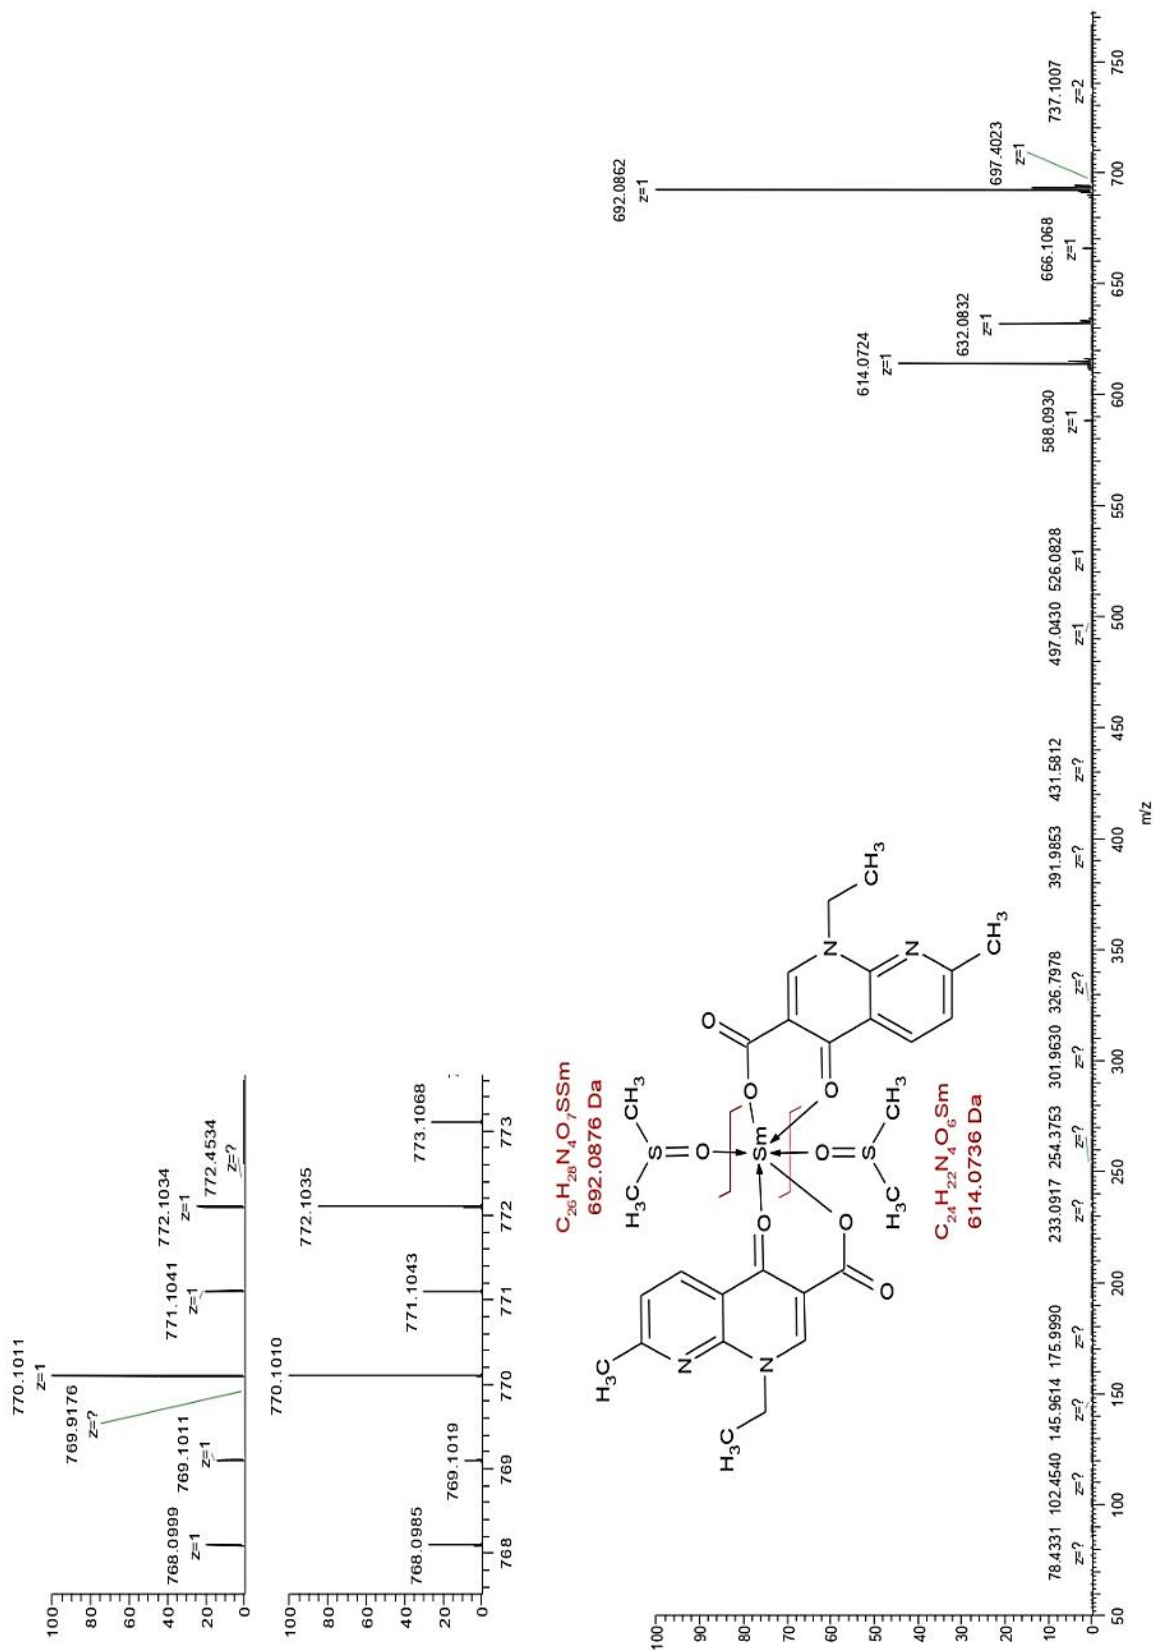

C.

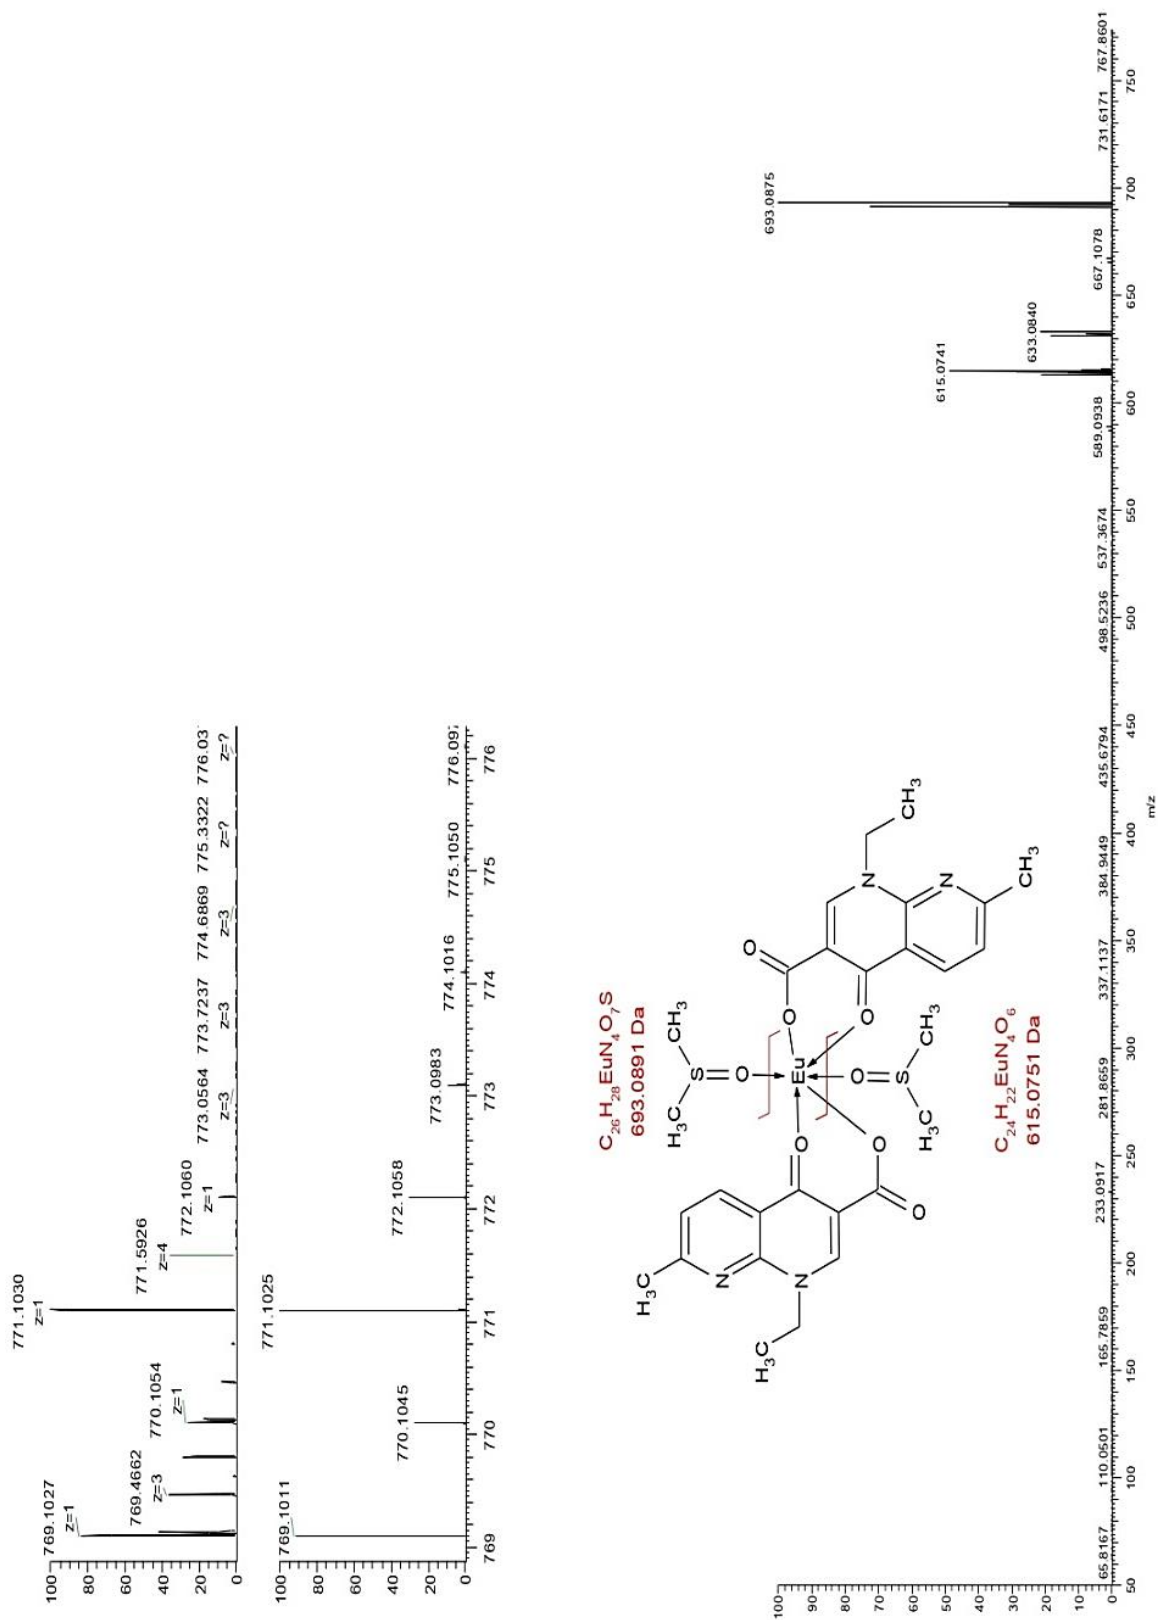

D.

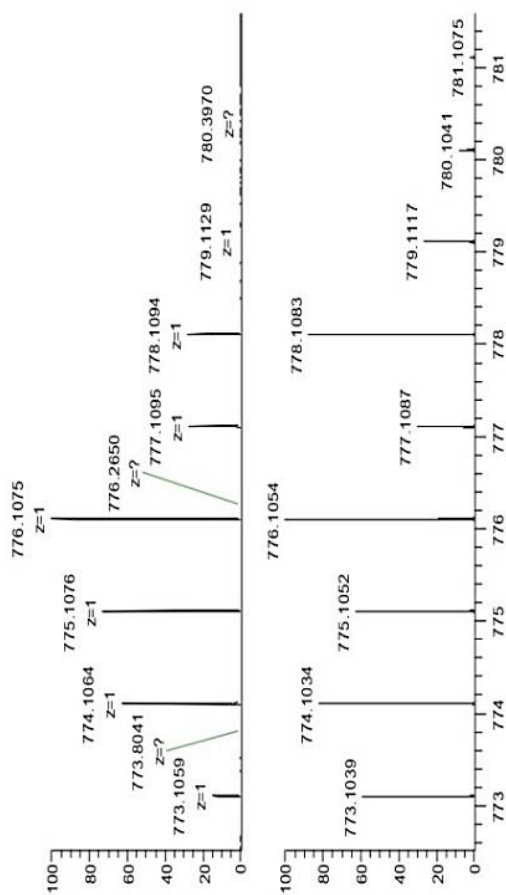

$C_{24}H_{22}GdN_4O_6$   
620.078 Da

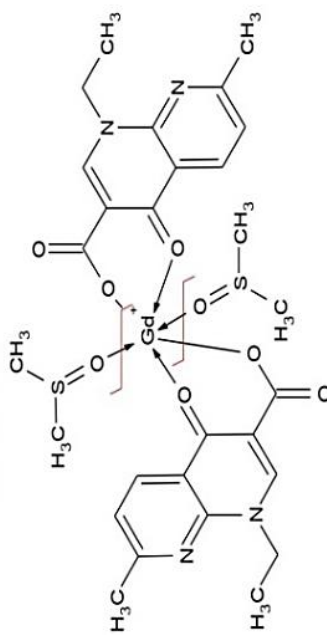

$C_{26}H_{28}GdN_4O_8S$   
698.092 Da

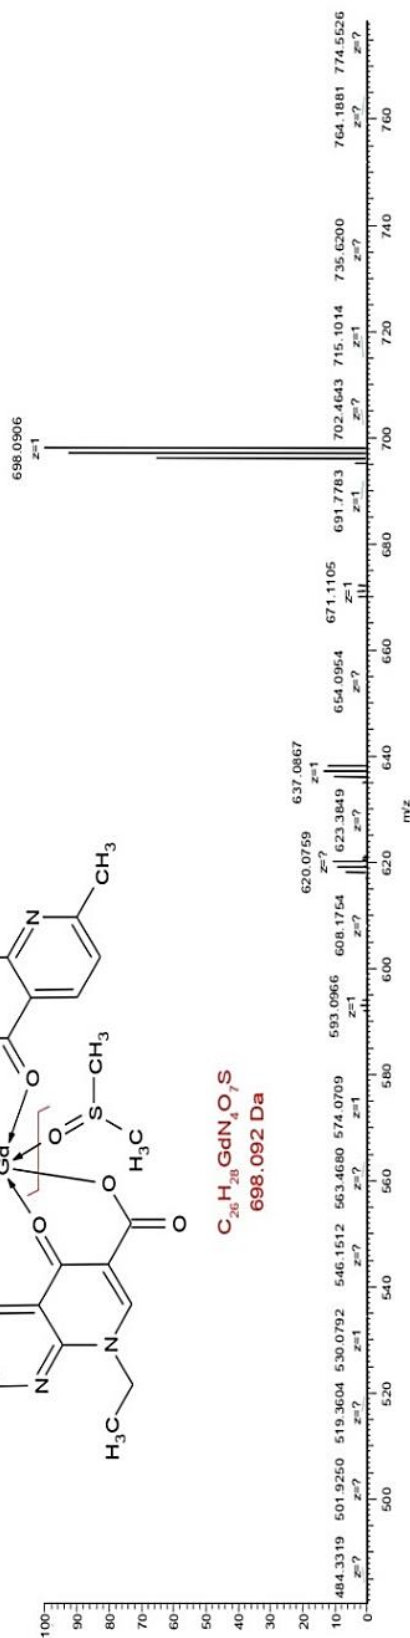

E.

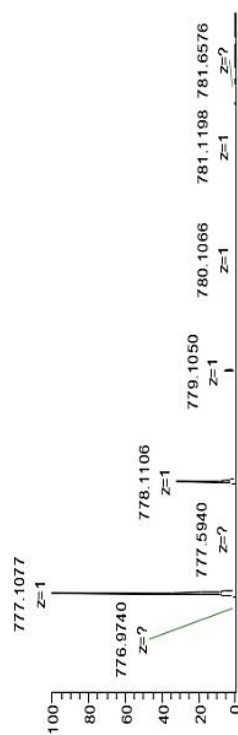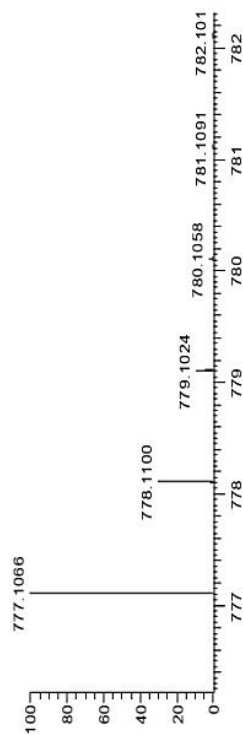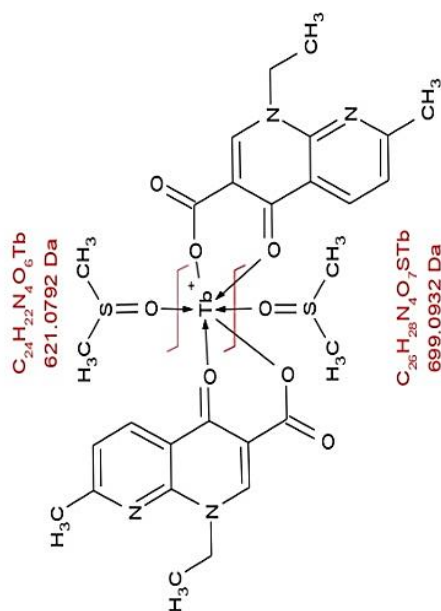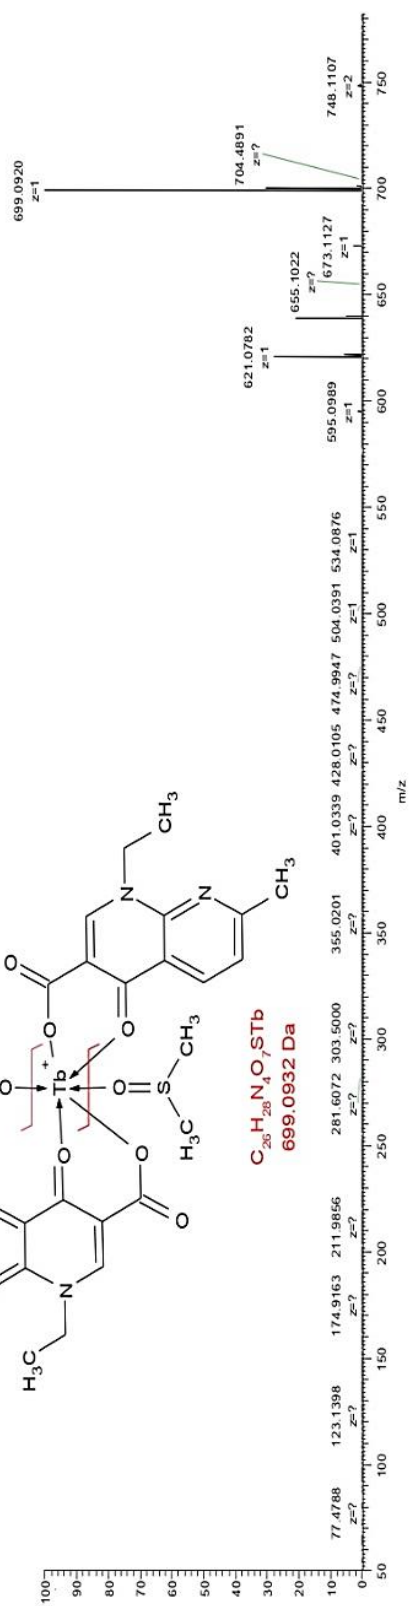

F.

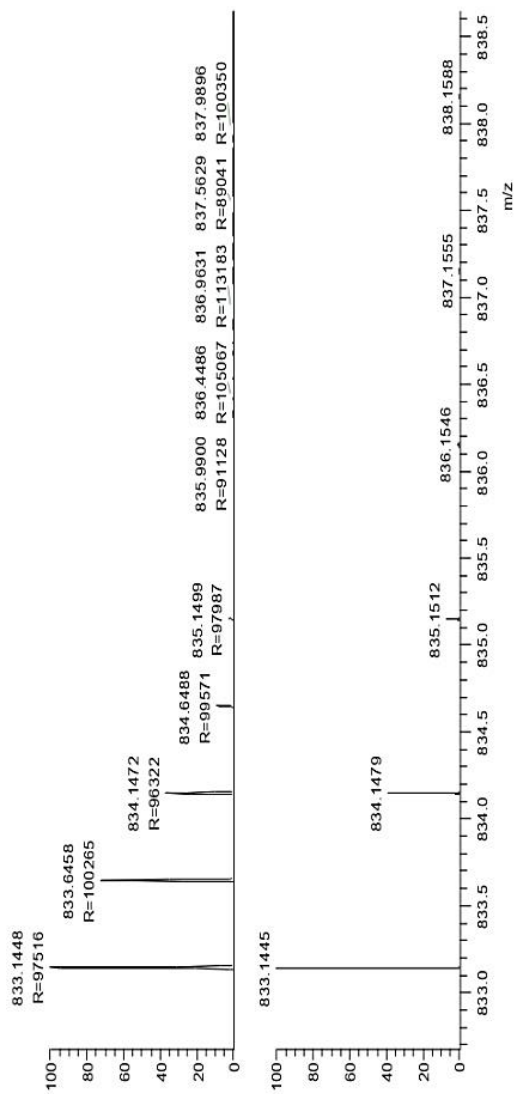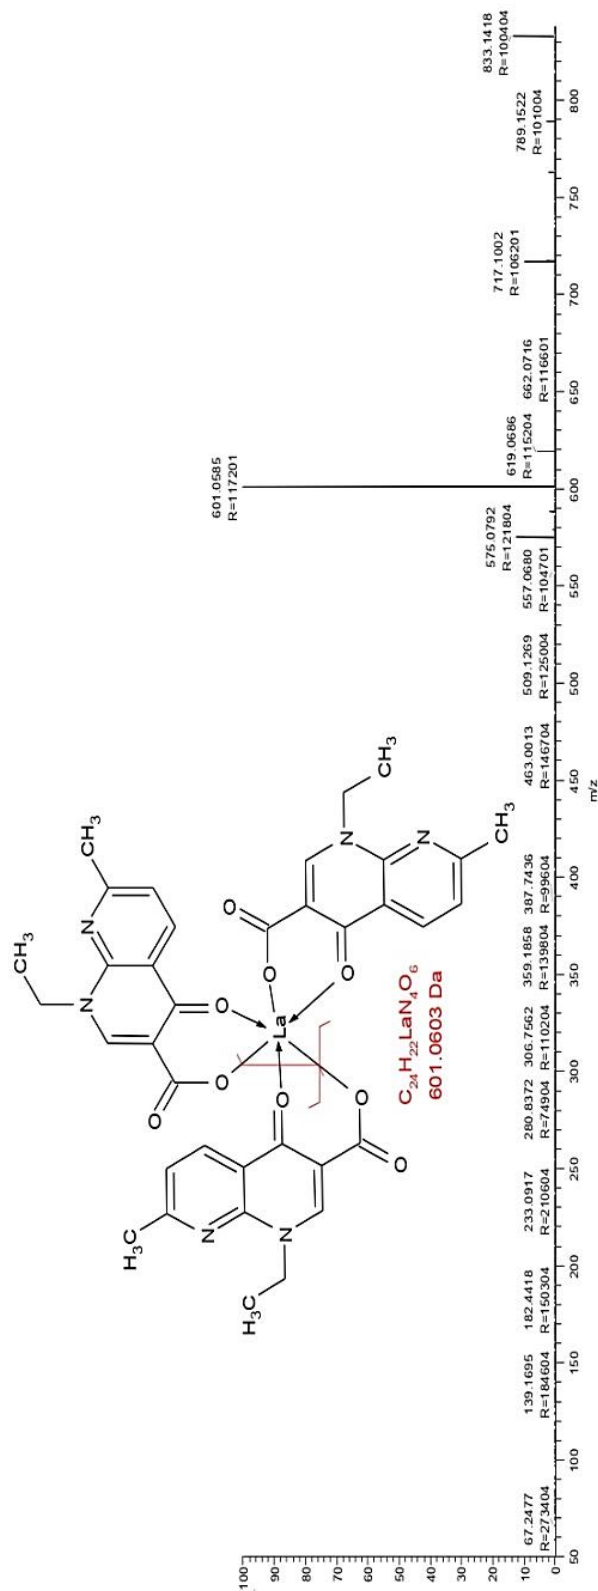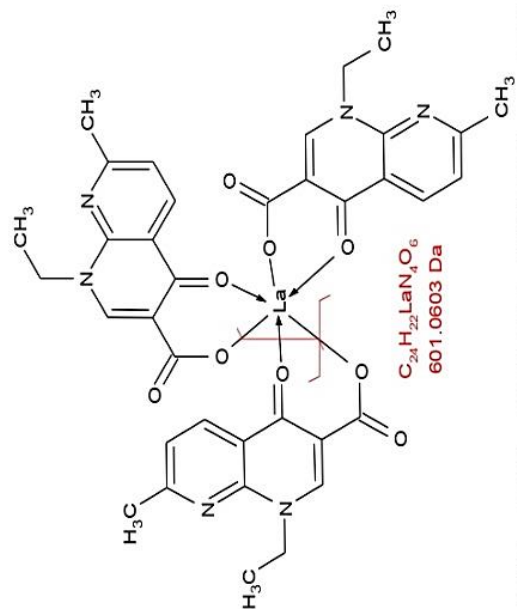

G.

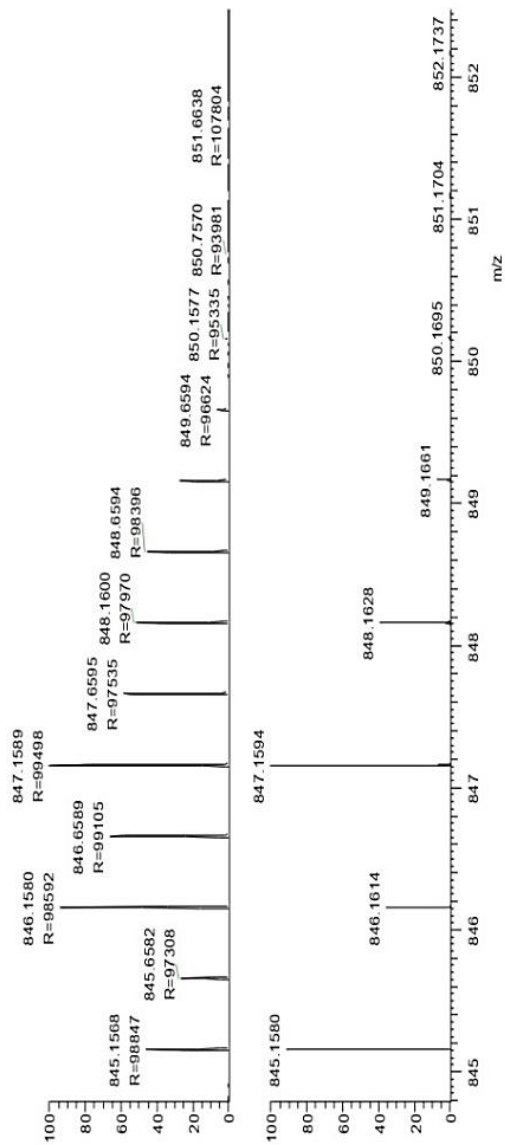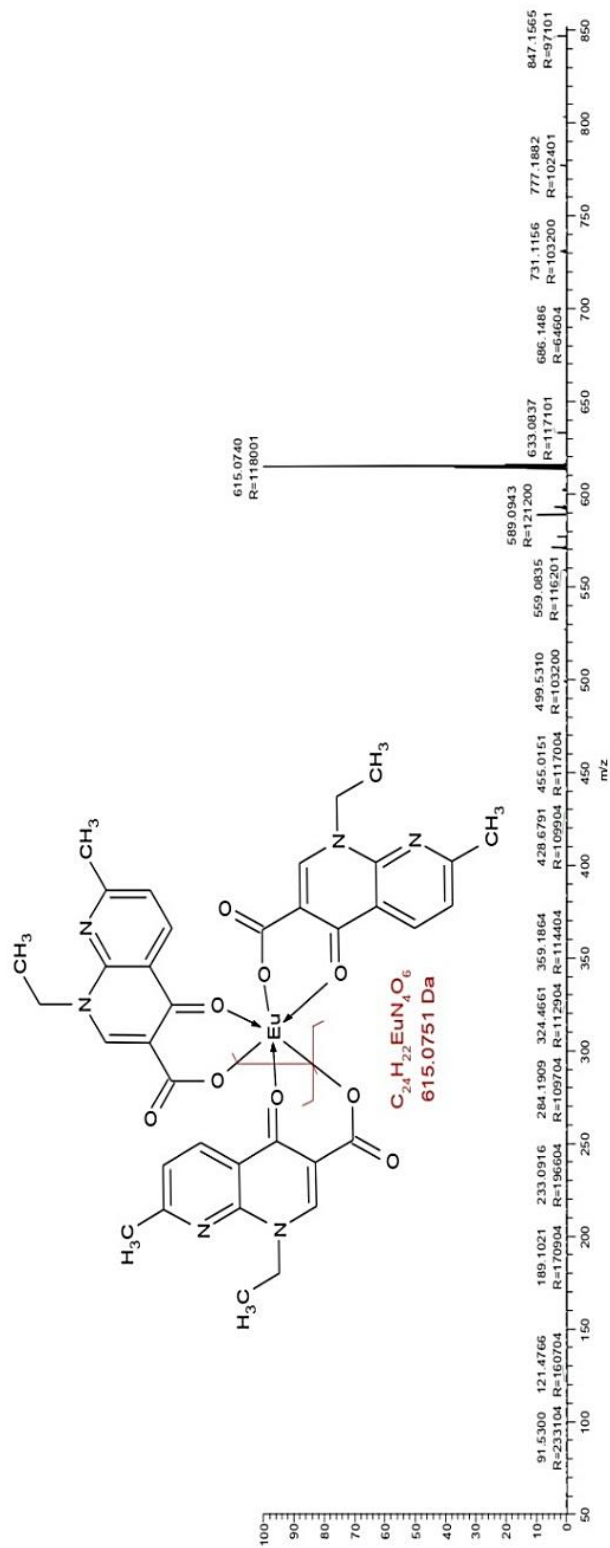



H.

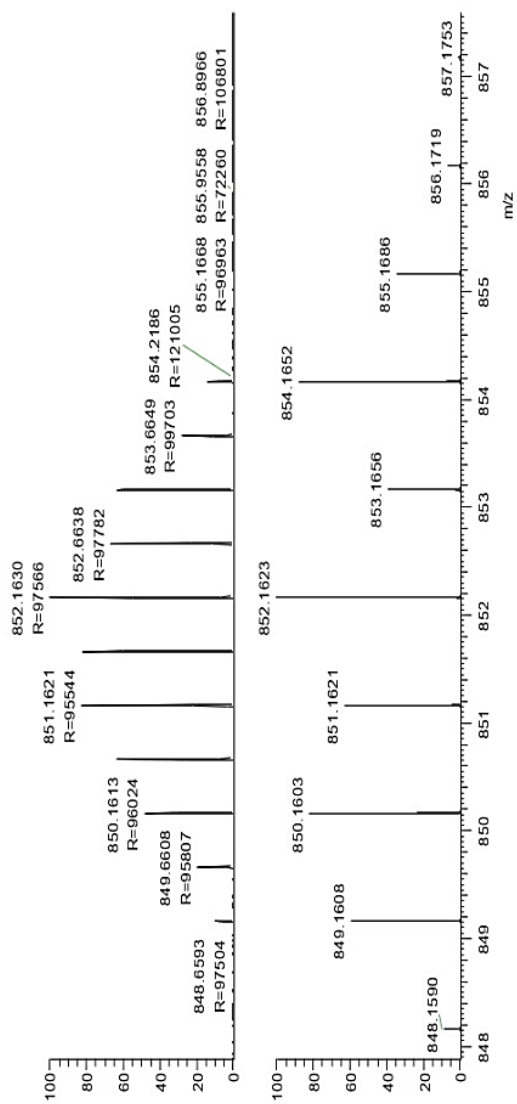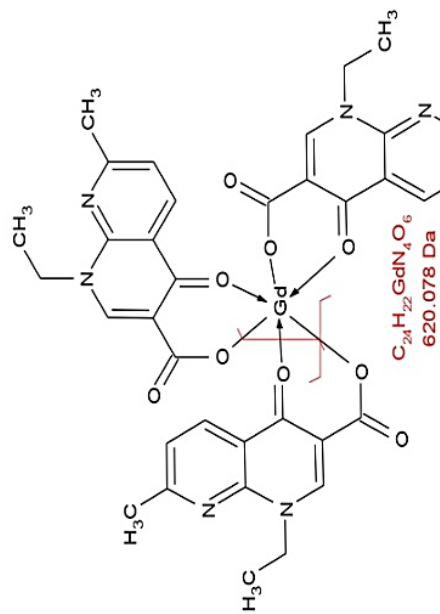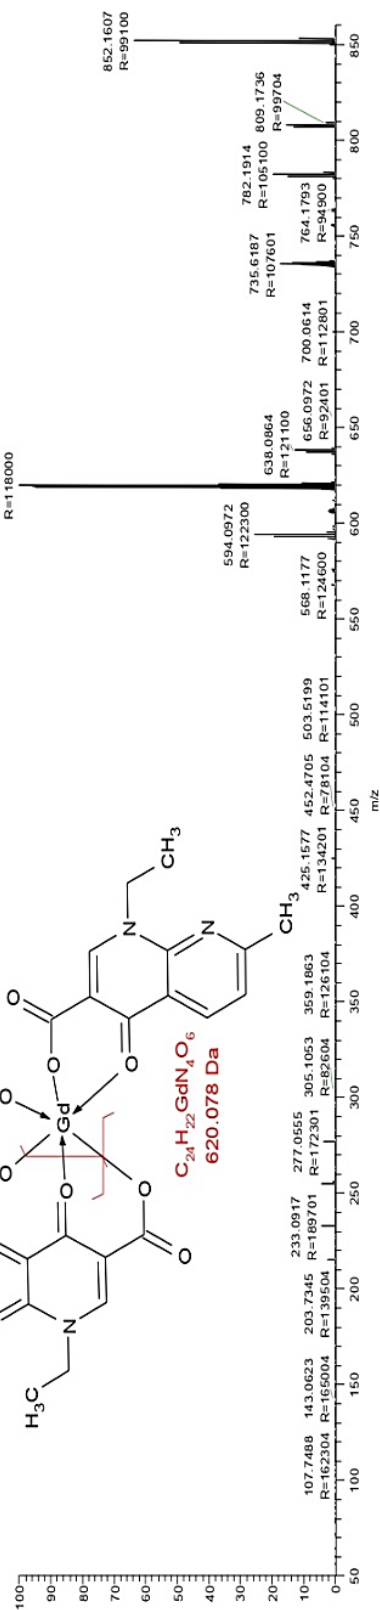

I.

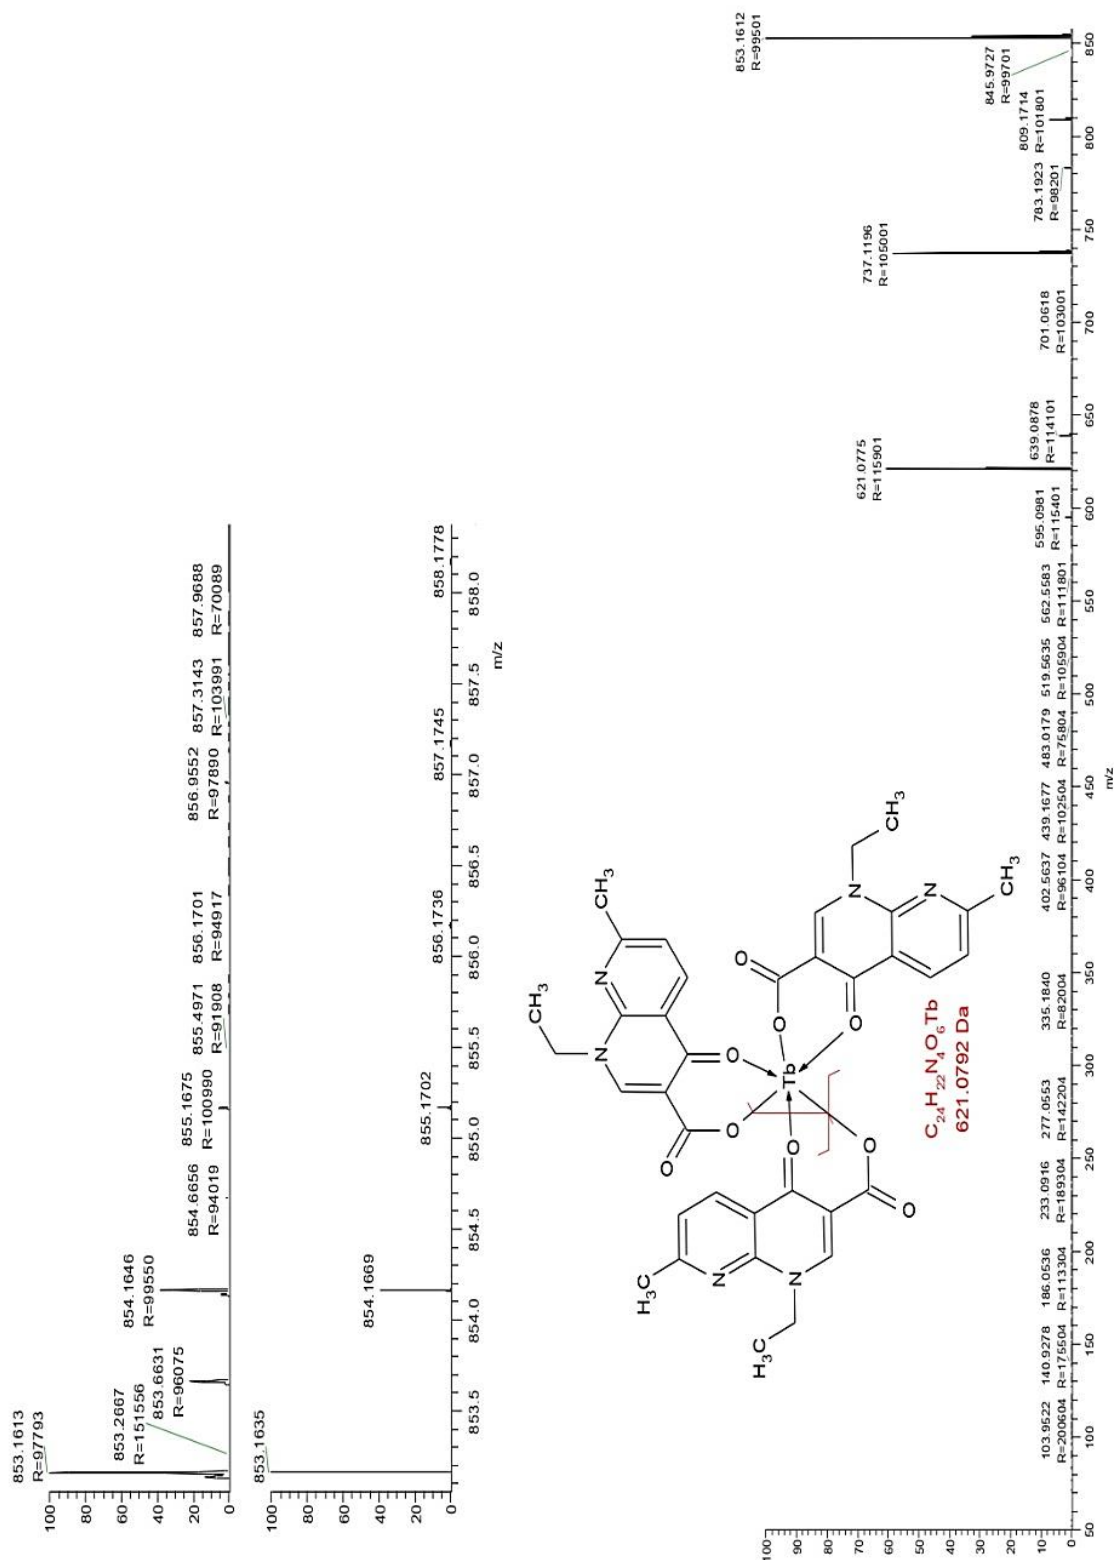

**Figure S2.** Mass spectra for the synthesized complexes: **A.** La(nal)<sub>2</sub>; **B.** Sm(nal)<sub>2</sub>; **C.** Eu(nal)<sub>2</sub>; **D.** Gd(nal)<sub>2</sub>; **E.** Tb(nal)<sub>2</sub>; **F.** La(nal)<sub>3</sub>; **G.** Eu(nal)<sub>3</sub>; **H.** Gd(nal)<sub>3</sub>; **I.** Tb(nal)<sub>3</sub>.

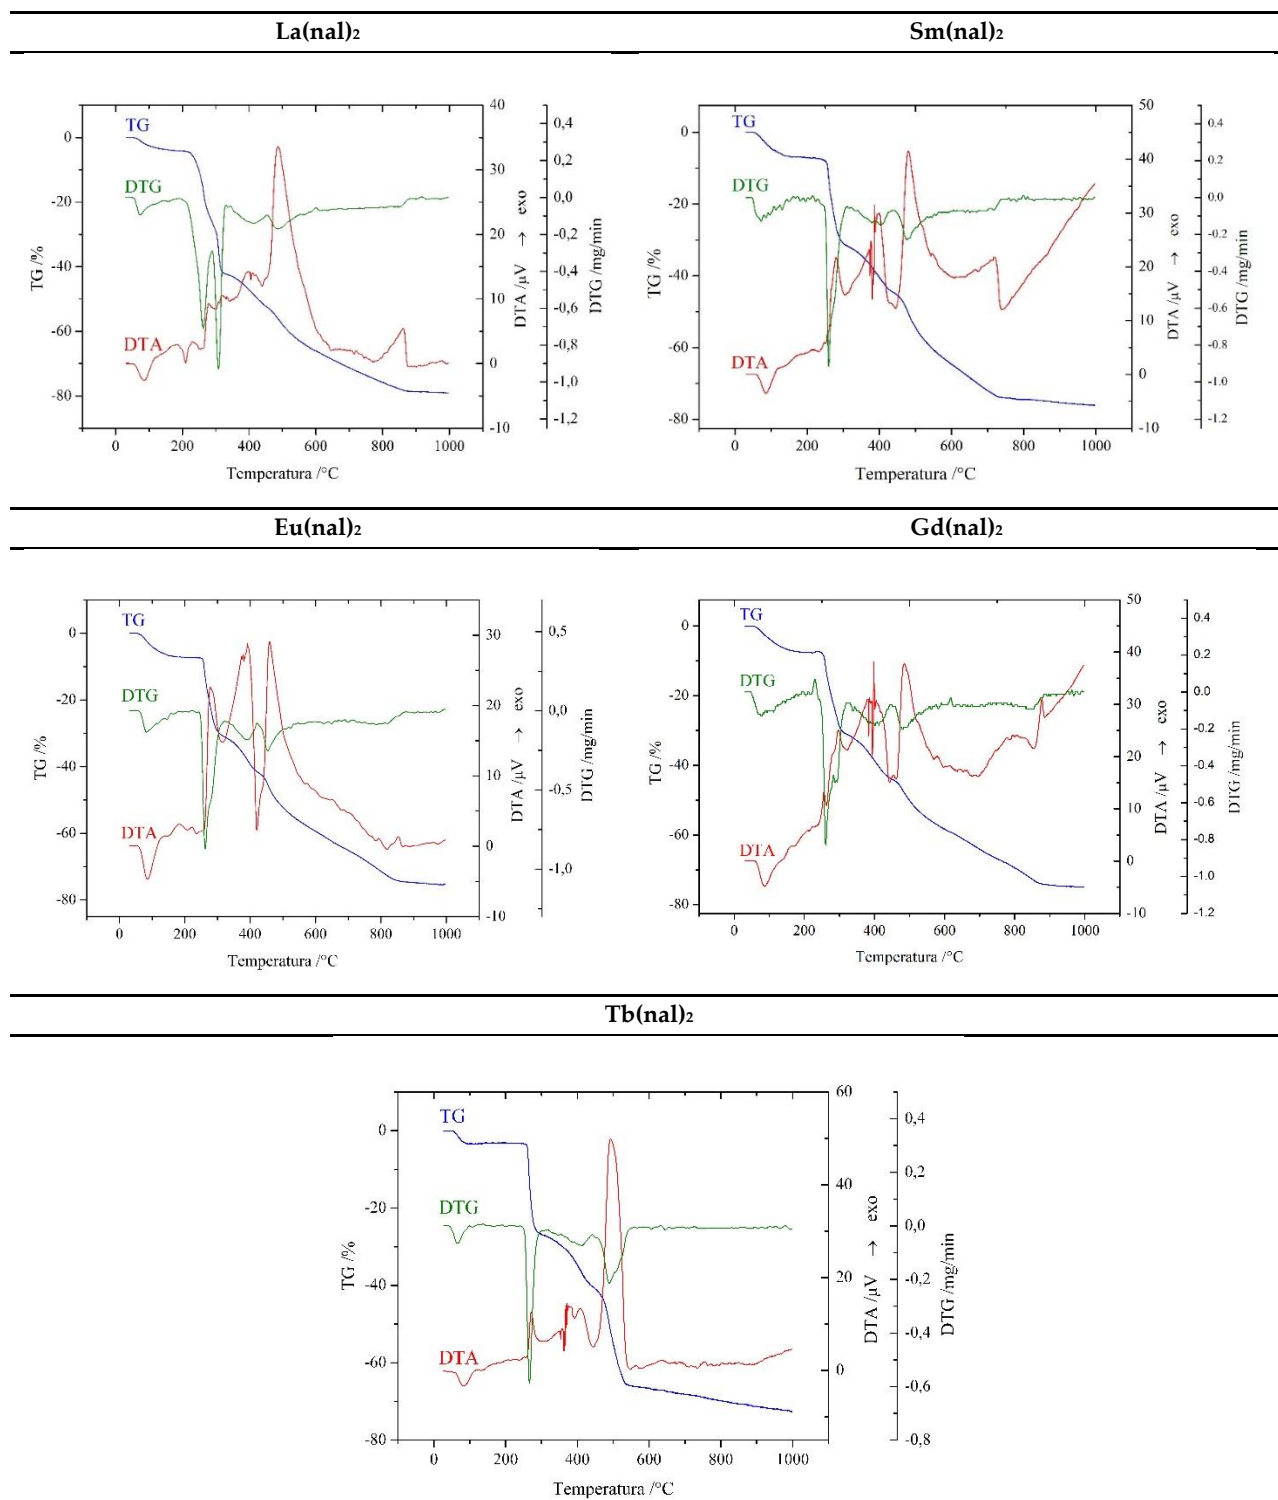

**Figure S3.** TG, DTG and DTA curves for the M(nal)<sub>2</sub> complexes, M= La<sup>3+</sup>, Sm<sup>3+</sup>, Eu<sup>3+</sup>, Gd<sup>3+</sup>, Tb<sup>3+</sup>.

**Table S4.** Thermal decomposition data (in air flow) for the M(nal)<sub>2</sub> complexes, M= La<sup>3+</sup>, Sm<sup>3+</sup>, Eu<sup>3+</sup>, Gd<sup>3+</sup>, Tb<sup>3+</sup>.

| Complex                                                           | Step                                             | Thermal effect | Temperature range / °C | $\Delta m_{\text{exp}}$ /% | $\Delta m_{\text{calc}}$ /% |
|-------------------------------------------------------------------|--------------------------------------------------|----------------|------------------------|----------------------------|-----------------------------|
| [La(nal) <sub>2</sub> (OH)(H <sub>2</sub> O)]·2H <sub>2</sub> O   | 1                                                | endothermic    | 55-150                 | 4.3                        | 4.7                         |
|                                                                   | 2                                                | exothermic     | 190-285                | 23.2                       | 22.9                        |
|                                                                   | 3                                                | exothermic     | 285-340                | 15.3                       | 15.0                        |
|                                                                   | 4                                                | exothermic     | 340-900                | 35.9                       | 36.0                        |
|                                                                   | <b>Residue (1/2 La<sub>2</sub>O<sub>3</sub>)</b> |                |                        | 21.3                       | 21.4                        |
| [Sm(nal) <sub>2</sub> (OH)(H <sub>2</sub> O)]·3H <sub>2</sub> O   | 1                                                | endothermic    | 50-220                 | 7.7                        | 7.3                         |
|                                                                   | 2                                                | exothermic     | 220-325                | 24.9                       | 25.2                        |
|                                                                   | 3                                                | exothermic     | 325-950                | 42.5                       | 42.7                        |
|                                                                   | <b>Residue (1/2 Sm<sub>2</sub>O<sub>3</sub>)</b> |                |                        | 24.9                       | 24.8                        |
| [Eu(nal) <sub>2</sub> (OH)(H <sub>2</sub> O)]·3H <sub>2</sub> O   | 1                                                | endothermic    | 55-215                 | 7.4                        | 7.7                         |
|                                                                   | 2                                                | exothermic     | 215-335                | 25.0                       | 24.8                        |
|                                                                   | 3                                                | exothermic     | 335-900                | 42.8                       | 42.5                        |
|                                                                   | <b>Residue (1/2 Eu<sub>2</sub>O<sub>3</sub>)</b> |                |                        | 24.8                       | 25.0                        |
| [Gd(nal) <sub>2</sub> (OH)(H <sub>2</sub> O)]·3H <sub>2</sub> O   | 1                                                | endothermic    | 50-210                 | 7.5                        | 7.6                         |
|                                                                   | 2                                                | exothermic     | 210-335                | 24.5                       | 24.7                        |
|                                                                   | 3                                                | exothermic     | 335-950                | 42.6                       | 42.1                        |
|                                                                   | <b>Residue (1/2 Gd<sub>2</sub>O<sub>3</sub>)</b> |                |                        | 25.4                       | 25.6                        |
| [Tb(nal) <sub>2</sub> (OH)(H <sub>2</sub> O)]·1.5H <sub>2</sub> O | 1                                                | endothermic    | 50-105                 | 3.6                        | 3.9                         |
|                                                                   | 2                                                | exothermic     | 240-340                | 25.3                       | 25.6                        |
|                                                                   | 3                                                | exothermic     | 340-950                | 43.6                       | 43.2                        |
|                                                                   | <b>Residue (1/4 Tb<sub>4</sub>O<sub>7</sub>)</b> |                |                        | 27.5                       | 27.3                        |

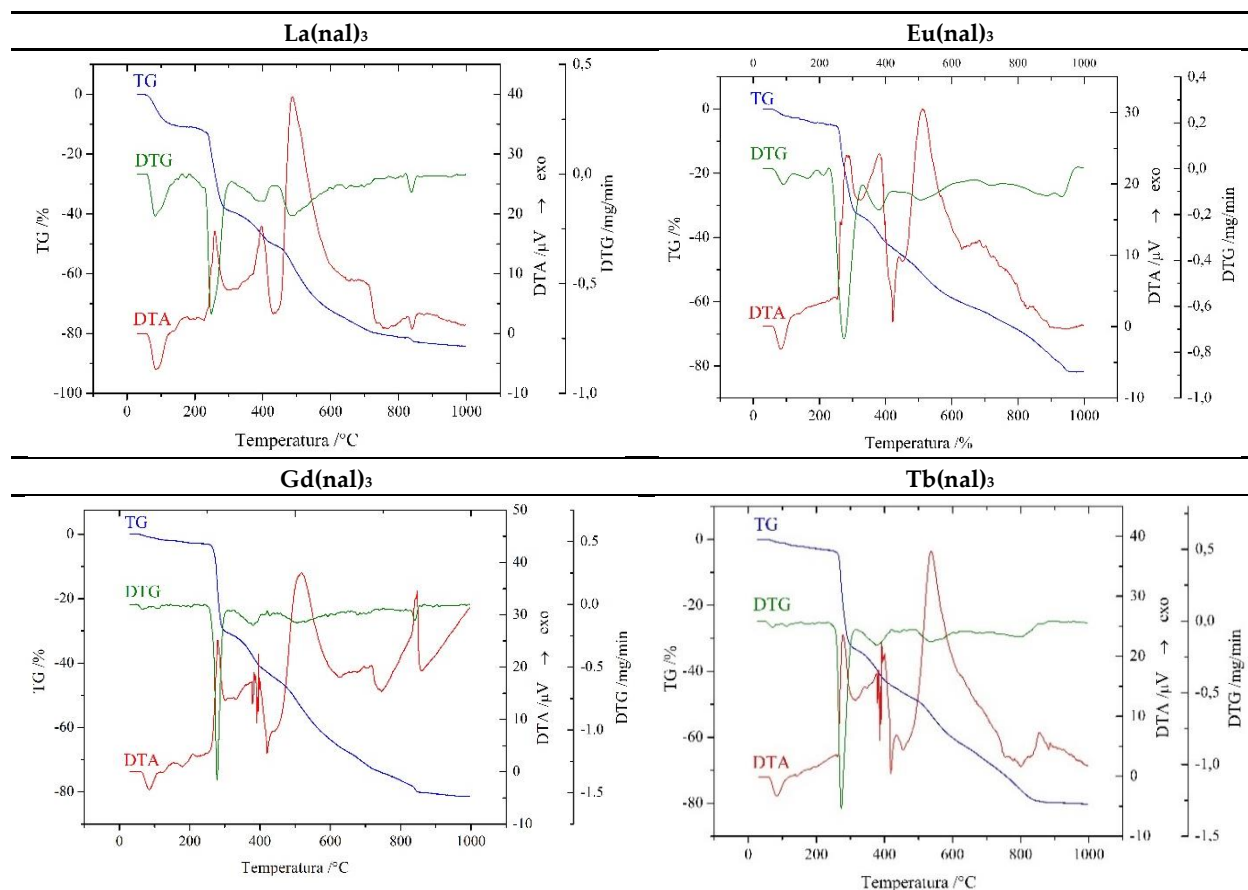

Figure S4. TG, DTG and DTA curves for the  $\text{M}(\text{nal})_3$  complexes,  $\text{M} = \text{La}^{3+}$ ,  $\text{Eu}^{3+}$ ,  $\text{Gd}^{3+}$ ,  $\text{Tb}^{3+}$ .

Table S5. Thermal decomposition data (in air flow) for the  $\text{M}(\text{nal})_3$  complexes,  $\text{M} = \text{La}^{3+}$ ,  $\text{Eu}^{3+}$ ,  $\text{Gd}^{3+}$ ,  $\text{Tb}^{3+}$

| Complex                                                                       | Step                                   | Thermal effect | Temperature range / $^{\circ}\text{C}$ | $\Delta m_{\text{exp}}$ /% | $\Delta m_{\text{calc}}$ /% |
|-------------------------------------------------------------------------------|----------------------------------------|----------------|----------------------------------------|----------------------------|-----------------------------|
| $[\text{La}(\text{nal})_3(\text{H}_2\text{O})_2] \cdot 6\text{H}_2\text{O}$   | 1                                      | endothermic    | 50-175                                 | 10.9                       | 11.1                        |
|                                                                               | 2                                      | exothermic     | 175-305                                | 28.3                       | 28.5                        |
|                                                                               | 3                                      | exothermic     | 305-950                                | 44.0                       | 43.7                        |
|                                                                               | Residue (1/2 $\text{La}_2\text{O}_3$ ) |                |                                        | 16.8                       | 16.7                        |
| $[\text{Eu}(\text{nal})_3(\text{H}_2\text{O})_2] \cdot 2.5\text{H}_2\text{O}$ | 1                                      | endothermic    | 50-225                                 | 4.7                        | 4.9                         |
|                                                                               | 2                                      | exothermic     | 225-330                                | 28.1                       | 28.2                        |
|                                                                               | 3                                      | exothermic     | 330-960                                | 48.0                       | 47.9                        |
|                                                                               | Residue (1/2 $\text{Eu}_2\text{O}_3$ ) |                |                                        | 19.2                       | 19.0                        |
| $[\text{Gd}(\text{nal})_3(\text{H}_2\text{O})_2] \cdot 1.5\text{H}_2\text{O}$ | 1                                      | endothermic    | 55-220                                 | 2.9                        | 2.9                         |
|                                                                               | 2                                      | exothermic     | 220-325                                | 28.6                       | 28.6                        |
|                                                                               | 3                                      | exothermic     | 325-980                                | 48.6                       | 48.7                        |
|                                                                               | Residue (1/2 $\text{Gd}_2\text{O}_3$ ) |                |                                        | 19.9                       | 19.8                        |
| $[\text{Tb}(\text{nal})_3(\text{H}_2\text{O})_2] \cdot 1.5\text{H}_2\text{O}$ | 1                                      | endothermic    | 55-235                                 | 3.0                        | 2.9                         |
|                                                                               | 2                                      | exothermic     | 235-335                                | 29.3                       | 29.5                        |
|                                                                               | 3                                      | exothermic     | 335-900                                | 47.7                       | 47.8                        |
|                                                                               | Residue (1/4 $\text{Tb}_4\text{O}_7$ ) |                |                                        | 20.0                       | 19.8                        |

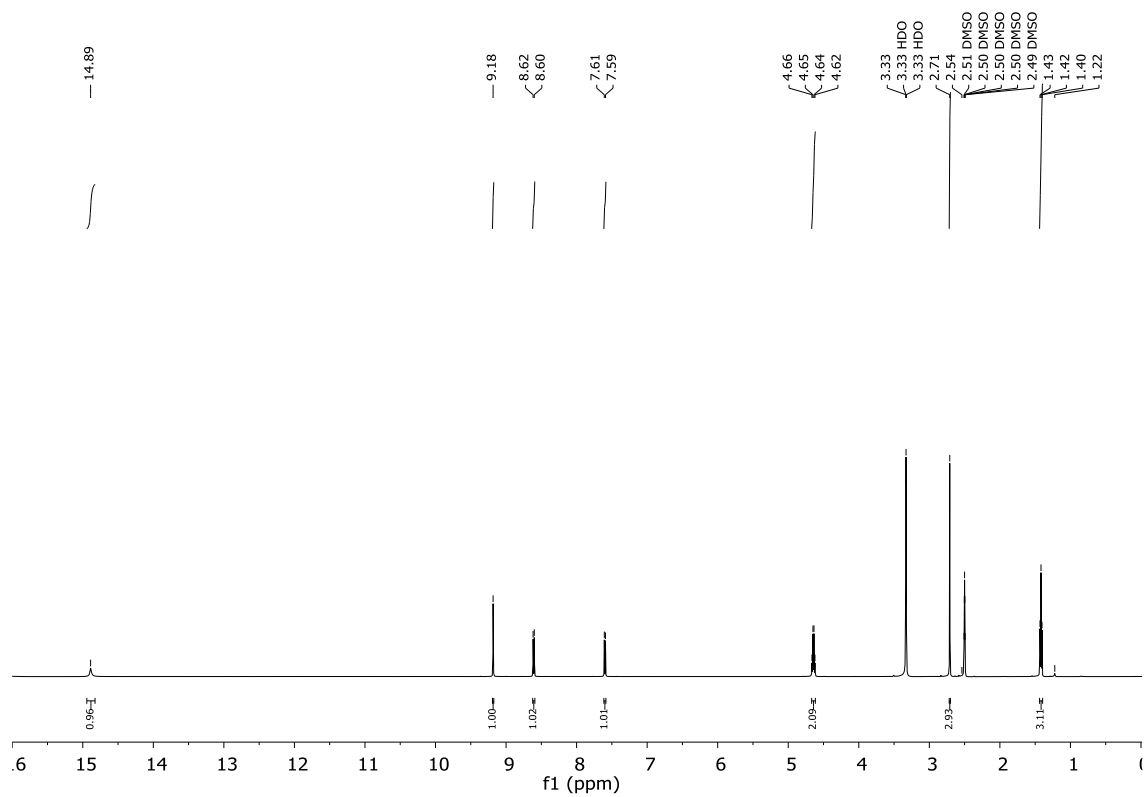

Figure S5. <sup>1</sup>H-NMR spectrum of nalidixic acid.

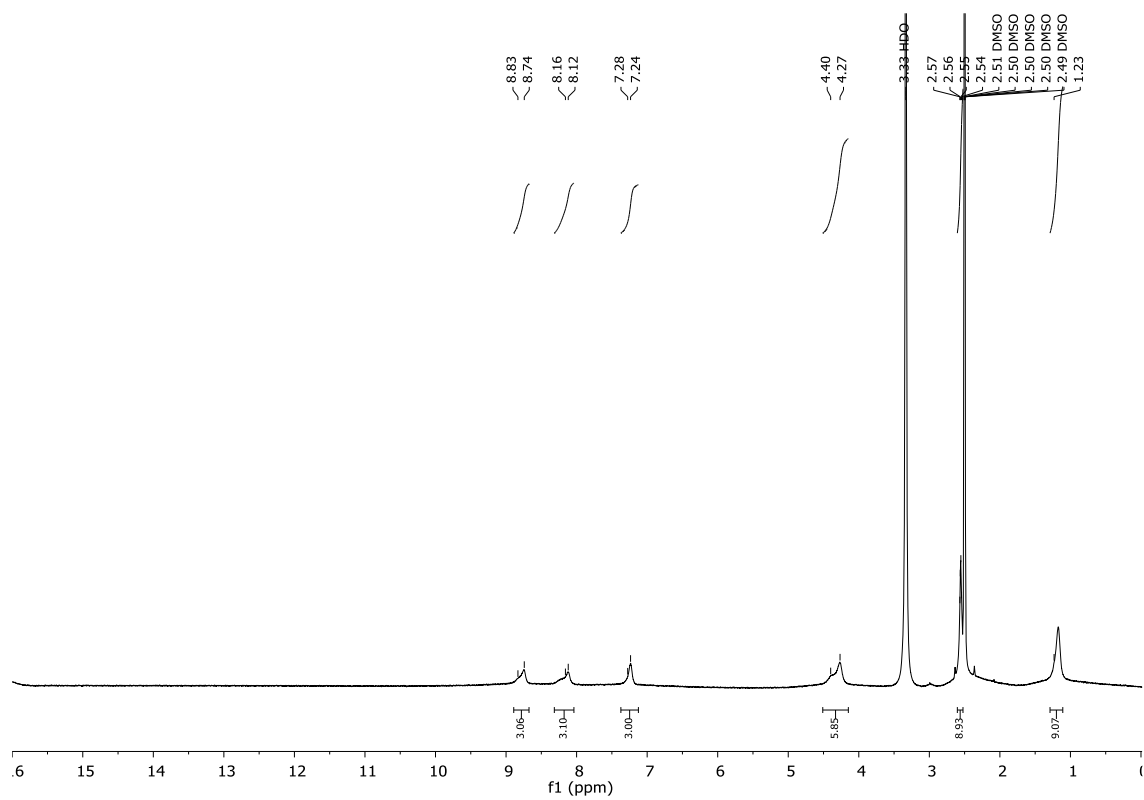

Figure S6. <sup>1</sup>H-NMR spectrum of La(nal)<sub>3</sub>.

**Table S6.** Geometric parameters: bond lengths, bond angles, dihedral angles, charge density, total energy of M(nal)<sub>2</sub> and M(nal)<sub>3</sub>.

|                                                                                                                                                   |                                                                                                                                                                                    |  |                                                                                                                                                                                              |  |
|---------------------------------------------------------------------------------------------------------------------------------------------------|------------------------------------------------------------------------------------------------------------------------------------------------------------------------------------|--|----------------------------------------------------------------------------------------------------------------------------------------------------------------------------------------------|--|
| 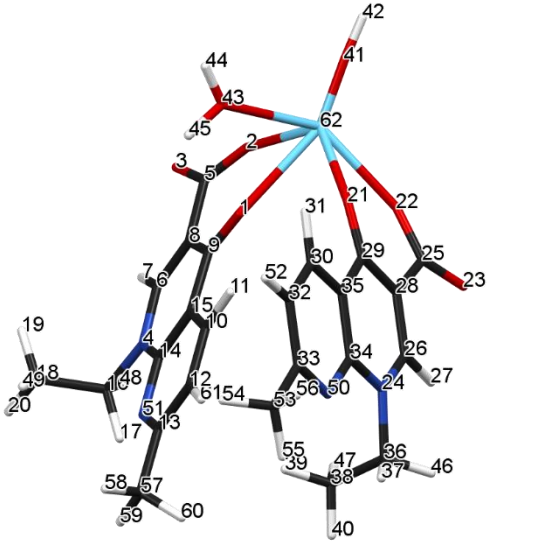 <p style="text-align: center;"><b>La(nal)<sub>2</sub></b></p>   | <b>Bond length (Å)</b><br>La-O1 2.565<br>La-O2 2.412<br>La-O21 2.564<br>La-O22 2.411<br>La-O41 1.493<br>La-O43 2.625                                                               |  | <b>Mulliken atomic charge</b><br>La62 0.679<br>O1 -0.342<br>O2 -0.458<br>O21 -0.354<br>O22 -0.452<br>O41 0.112<br>O43 -0.307<br>N4 -0.304<br>N24 -0.301<br>N50 -0.225<br>N51 -0.227          |  |
| <p><b>Total energy (a.u.): -1778.62</b></p>                                                                                                       | <b>Bond angle (°)</b><br>O1-La-O2 62.35<br>O21-La-O22 62.73<br>O41-La-O43 92.38<br>O41-La-O22 117.29<br>O2-La-O43 86.62<br>O1-La-O21 66.04<br>La-O22-C25 152.10<br>La-O2-C5 153.33 |  | <b>Torsion angle</b><br>O41-La-O22-C25 126.31<br>O43-La-O2-C5 -70.32<br>O43-La-O21-C29 128.66<br>O41-La-O1-C9 125.93<br>La-O22-C25-O23 176.10<br>La-O2-C5-O3 176.66<br>C8-C14-C28-C34 141.95 |  |
|  <p style="text-align: center;"><b>Sm(nal)<sub>2</sub></b></p> | <b>Bond length (Å)</b><br>Sm-O1 2.303<br>Sm-O2 2.299<br>Sm-O21 2.301<br>Sm-O22 2.296<br>Sm-O41 2.320<br>Sm-O43 2.320                                                               |  | <b>Mulliken atomic charge</b><br>Sm62 0.871<br>O1 -0.455<br>O2 -0.442<br>O21 -0.458<br>O22 -0.441<br>O41 -0.610<br>O43 -0.245<br>N4 -0.231<br>N24 -0.232<br>N50 -0.226<br>N51 -0.223         |  |

|                                                                                                                      |                                                                                                                                                                                                                               |  |                                                                                                                                                                                                                                         |  |
|----------------------------------------------------------------------------------------------------------------------|-------------------------------------------------------------------------------------------------------------------------------------------------------------------------------------------------------------------------------|--|-----------------------------------------------------------------------------------------------------------------------------------------------------------------------------------------------------------------------------------------|--|
| <p><b>Total energy (a.u.): -2405.35</b></p>                                                                          | <p><b>Bond angle</b><br/>(°)</p> <p>O1-Sm-O2 84.12</p> <p>O21-Sm-O22 84.42</p> <p>O41-Sm-O43 84.21</p> <p>O41-Sm-O22 95.80</p> <p>O2-Sm-O43 94.11</p> <p>O1-Sm-O21 92.67</p> <p>Sm-O22-C25 120.84</p> <p>Sm-O2-C5 121.80</p>  |  | <p><b>Torsion angle</b></p> <p>O41-Sm-O22-C25 -146.83</p> <p>O43-Sm-O2-C5 -151.54</p> <p>O43-Sm-O21-C29 -130.98</p> <p>O41-Sm-O1-C9 -127.69</p> <p>Sm-O22-C25-O23 156.65</p> <p>Sm-O2-C5-O3 158.94</p> <p>C8-C14-C28-C34 106.51</p>     |  |
| 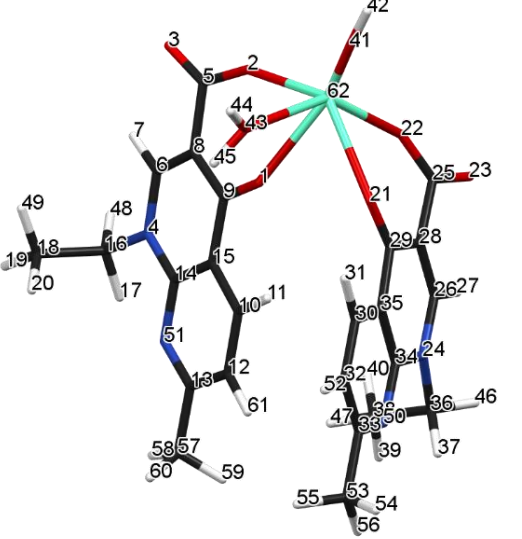 <p><b>Eu(nal)<sub>2</sub></b></p> | <p><b>Bond length</b><br/>(Å)</p> <p>Eu-O1 2.432</p> <p>Eu-O2 2.313</p> <p>Eu-O21 2.431</p> <p>Eu-O22 2.310</p> <p>Eu-O41 1.503</p> <p>Eu-O43 2.484</p>                                                                       |  | <p><b>Mulliken atomic charge</b></p> <p>Eu62 0.973</p> <p>O1 -0.334</p> <p>O2 -0.452</p> <p>O21 -0.351</p> <p>O22 -0.447</p> <p>O41 -0.236</p> <p>O43 -0.297</p> <p>N4 -0.302</p> <p>N24 -0.299</p> <p>N50 -0.226</p> <p>N51 -0.226</p> |  |
| <p><b>Total energy (a.u.): -2457.44</b></p>                                                                          | <p><b>Bond angle</b><br/>(°)</p> <p>O1-Eu-O2 64.48</p> <p>O21-Eu-O22 65.11</p> <p>O41-Eu-O43 90.62</p> <p>O41-Eu-O22 116.03</p> <p>O2-Eu-O43 87.53</p> <p>O1-Eu-O21 67.02</p> <p>Eu-O22-C25 151.51</p> <p>Eu-O2-C5 152.87</p> |  | <p><b>Torsion angle</b></p> <p>O41-Eu-O22-C25 123.70</p> <p>O43-Eu-O2-C5 -73.01</p> <p>O43-Eu-O21-C29 131.90</p> <p>O41-Eu-O1-C9 122.66</p> <p>Eu-O22-C25-O23 176.70</p> <p>Eu-O2-C5-O3 177.79</p> <p>C8-C14-C28-C34 146.86</p>         |  |



|                                                                                                                                                  |                                                                                                                                                                                         |  |                                                                                                                                                                                                  |  |
|--------------------------------------------------------------------------------------------------------------------------------------------------|-----------------------------------------------------------------------------------------------------------------------------------------------------------------------------------------|--|--------------------------------------------------------------------------------------------------------------------------------------------------------------------------------------------------|--|
| 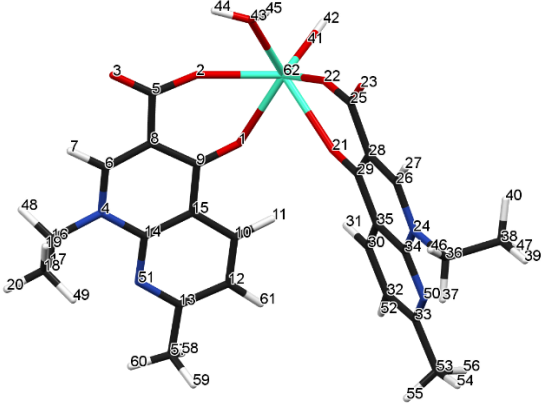 <p style="text-align: center;"><b>Gd(nal)<sub>2</sub></b></p>  | <b>Bond length<br/>(Å)</b><br>Gd-O1 2.389<br>Gd-O2 2.309<br>Gd-O21 2.388<br>Gd-O22 2.310<br>Gd-O41 1.511<br>Gd-O43 2.443                                                                |  | <b>Mulliken atomic charge</b><br>Gd62 1.016<br>O1 -0.373<br>O2 -0.462<br>O21 -0.374<br>O22 -0.463<br>O41 -0.150<br>O43 -0.317<br>N4 -0.299<br>N24 -0.300<br>N50 -0.226<br>N51 -0.226             |  |
| <p><b>Total energy (a.u.): -2512.80</b></p>                                                                                                      | <b>Bond angle<br/>(°)</b><br>O1-Gd-O2 63.51<br>O21-Gd-O22 63.51<br>O41-Gd-O43 110.04<br>O41-Gd-O22 118.52<br>O2-Gd-O43 64.29<br>O1-Gd-O21 72.96<br>Gd-O22-C25 154.71<br>Gd-O2-C5 154.76 |  | <b>Torsion angle</b><br>O41-Gd-O22-C25 -105.40<br>O43-Gd-O2-C5 -157.74<br>O43-Gd-O21-C29 -15.28<br>O41-Gd-O1-C9 -121.31<br>Gd-O22-C25-O23 -175.93<br>Gd-O2-C5-O3 176.26<br>C8-C14-C28-C34 178.80 |  |
|  <p style="text-align: center;"><b>Tb(nal)<sub>2</sub></b></p> | <b>Bond length<br/>(Å)</b><br>Tb-O1 2.365<br>Tb-O2 2.294<br>Tb-O21 2.375<br>Tb-O22 2.290<br>Tb-O41 1.509<br>Tb-O43 2.425                                                                |  | <b>Mulliken atomic charge</b><br>Tb62 1.001<br>O1 -0.367<br>O2 -0.469<br>O21 -0.370<br>O22 -0.467<br>O41 -0.159<br>O43 -0.311<br>N4 -0.300<br>N24 -0.301<br>N50 -0.225<br>N51 -0.226             |  |
| <p><b>Total energy (a.u.): -2570.98</b></p>                                                                                                      | <b>Bond angle<br/>(°)</b><br>O1-Tb-O2 64.46<br>O21-Tb-O22 64.75<br>O41-Tb-O43 111.05<br>O41-Tb-O22 124.58<br>O2-Tb-O43 66.13<br>O1-Tb-O21 68.52<br>Tb-O22-C25 153.20<br>Tb-O2-C5 153.60 |  | <b>Torsion angle</b><br>O41-Tb-O22-C25 -98.79<br>O43-Tb-O2-C5 -131.52<br>O43-Tb-O21-C29 8.75<br>O41-Tb-O1-C9 -110.54<br>Tb-O22-C25-O23 -176.44<br>Tb-O2-C5-O3 173.14<br>C8-C14-C28-C34 -158.87   |  |

|                                                                                                                                                   |                                                                                                                                                                   |                                                                                           |                                                                                                                                                                                                                                                             |                                                                                                                                                   |
|---------------------------------------------------------------------------------------------------------------------------------------------------|-------------------------------------------------------------------------------------------------------------------------------------------------------------------|-------------------------------------------------------------------------------------------|-------------------------------------------------------------------------------------------------------------------------------------------------------------------------------------------------------------------------------------------------------------|---------------------------------------------------------------------------------------------------------------------------------------------------|
| 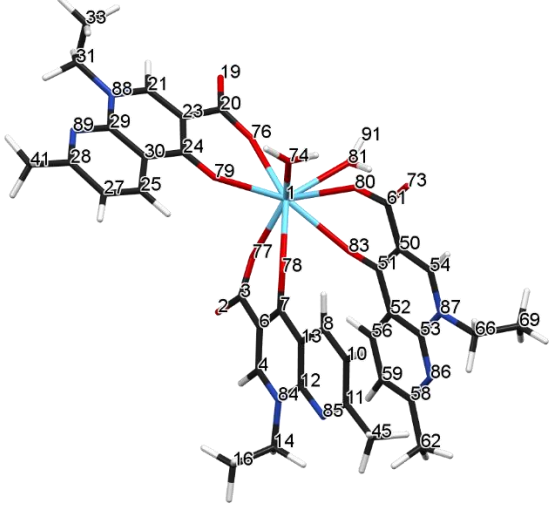 <p style="text-align: center;"><b>La(nal)<sub>3</sub></b></p>   | <b>Bond length (Å)</b><br>La1-O74<br>La1-O81<br>La1-O80<br>La1-O83<br>La1-O77<br>La1-O78<br>La1-O76<br>La1-O79                                                    | 2.615<br>2.524<br>2.487<br>2.563<br>2.374<br>2.557<br>2.338<br>2.548                      | <b>Mulliken atomic charge</b><br>La1<br>O74<br>O81<br>O80<br>O83<br>O77<br>O78<br>O76<br>O79<br>N84<br>N85<br>N86<br>N87<br>N88<br>N89                                                                                                                      | 1.183<br>-0.304<br>-0.308<br>-0.504<br>-0.362<br>-0.467<br>-0.376<br>-0.470<br>-0.379<br>-0.299<br>-0.228<br>-0.227<br>-0.300<br>-0.298<br>-0.224 |
| <p><b>Total energy (a.u.): -2577.37</b></p>                                                                                                       | <b>Bond angle (°)</b><br>O74-La-O81<br>O81-La-O80<br>O80-La-O83<br>O83-La-O78<br>O78-La-O77<br>O77-La-O79<br>O79-La-O76<br>O76-La-O74<br>La-O80-C61<br>La-O79-C24 | 101.13<br>60.36<br>59.77<br>63.06<br>62.95<br>91.23<br>62.79<br>89.32<br>148.86<br>140.94 | <b>Torsion angle</b><br>O74-La-O80-C61<br>O74-La-O83-C51<br>O74-La-O78-C7<br>O74-La-O77-C3<br>O74-La-O79-C24<br>O74-La-O76-C20<br>O74-La-O81-H91<br>La-O76-C20-O19<br>La-O80-C61-O73<br>La-O77-C3-O2<br>N87-C51-C6-C12<br>N88-C24-N87-C51<br>N88-C24-N84-C7 | 111.35<br>12.16<br>-179.90<br>-50.01<br>113.87<br>-59.61<br>-90.16<br>175.68<br>-148.64<br>174.01<br>2.06<br>-90.47<br>-174.19                    |
|  <p style="text-align: center;"><b>Eu(nal)<sub>3</sub></b></p> | <b>Bond length (Å)</b><br>Eu1-O74<br>Eu1-O81<br>Eu1-O80<br>Eu1-O83<br>Eu1-O77<br>Eu1-O78<br>Eu1-O76<br>Eu1-O79                                                    | 2.475<br>2.474<br>2.321<br>2.415<br>2.285<br>2.419<br>2.357<br>2.418                      | <b>Mulliken atomic charge</b><br>Eu1<br>O74<br>O81<br>O80<br>O83<br>O77<br>O78<br>O76<br>O79<br>N84<br>N85<br>N86<br>N87<br>N88<br>N89                                                                                                                      | 1.069<br>-0.287<br>-0.283<br>-0.441<br>-0.347<br>-0.442<br>-0.361<br>-0.438<br>-0.354<br>-0.298<br>-0.225<br>-0.226<br>-0.300<br>-0.301<br>-0.226 |



|                                                                                                                                                 |                        |        |                               |         |
|-------------------------------------------------------------------------------------------------------------------------------------------------|------------------------|--------|-------------------------------|---------|
| 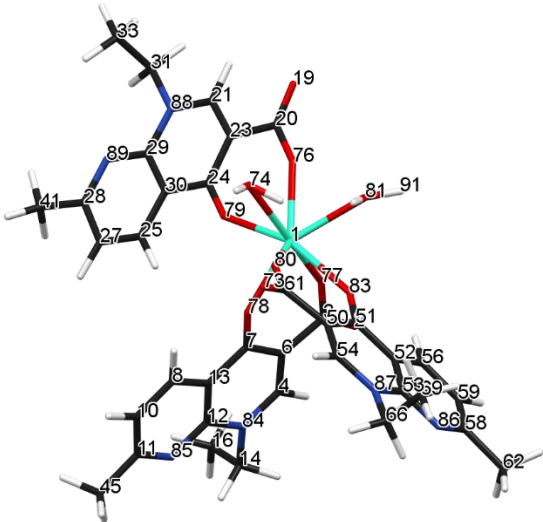 <p style="text-align: center;"><b>Tb(nal)<sub>3</sub></b></p> | <b>Bond length (Å)</b> |        | <b>Mulliken atomic charge</b> |         |
|                                                                                                                                                 | Tb1-O74                | 2.425  | Tb1                           | 1.116   |
|                                                                                                                                                 | Tb1-O81                | 2.421  | O74                           | -0.350  |
|                                                                                                                                                 | Tb1-O80                | 2.296  | O81                           | -0.261  |
|                                                                                                                                                 | Tb1-O83                | 2.368  | O80                           | -0.493  |
|                                                                                                                                                 | Tb1-O77                | 2.279  | O83                           | -0.377  |
|                                                                                                                                                 | Tb1-O78                | 2.366  | O77                           | -0.464  |
|                                                                                                                                                 | Tb1-O76                | 2.300  | O78                           | -0.385  |
|                                                                                                                                                 | Tb1-O79                | 2.364  | O76                           | -0.453  |
|                                                                                                                                                 |                        |        | O79                           | -0.383  |
|                                                                                                                                                 |                        |        | N84                           | -0.301  |
|                                                                                                                                                 |                        |        | N85                           | -0.226  |
|                                                                                                                                                 |                        |        | N86                           | -0.224  |
|                                                                                                                                                 |                        |        | N87                           | -0.300  |
|                                                                                                                                                 |                        |        | N88                           | -0.299  |
|                                                                                                                                                 |                        |        | N89                           | -0.225  |
| <p><b>Total energy (a.u.): -3369.41</b></p>                                                                                                     | <b>Bond angle (°)</b>  |        | <b>Torsion angle</b>          |         |
|                                                                                                                                                 | O74-Tb-O81             | 89.90  | O74-Tb-O80-C61                | -147.22 |
|                                                                                                                                                 | O81-Tb-O80             | 99.70  | O74-Tb-O83-C51                | 53.72   |
|                                                                                                                                                 | O80-Tb-O83             | 64.04  | O74-Tb-O78-C7                 | 164.65  |
|                                                                                                                                                 | O83-Tb-O78             | 86.84  | O74-Tb-O77-C3                 | -108.00 |
|                                                                                                                                                 | O78-Tb-O77             | 65.24  | O74-Tb-O79-C24                | 80.06   |
|                                                                                                                                                 | O77-Tb-O79             | 88.89  | O74-Tb-O76-C20                | -92.29  |
|                                                                                                                                                 | O79-Tb-O76             | 64.71  | O74-Tb-O81-H91                | 158.09  |
|                                                                                                                                                 | O76-Tb-O74             | 66.91  | Tb-O76-C20-O19                | 178.23  |
|                                                                                                                                                 | Tb-O80-C61             | 153.53 | Tb-O80-C61-O73                | 171.76  |
|                                                                                                                                                 | Tb-O79-C24             | 144.10 | Tb-O77-C3-O2                  | -168.07 |
|                                                                                                                                                 |                        |        | N87-C51-C6-C12                | 36.88   |
|                                                                                                                                                 |                        |        | N88-C24-N87-C51               | -47.12  |
|                                                                                                                                                 |                        |        | N88-C24-N84-C7                | -176.51 |

**Table S7.** IR selected data (experimental vs. predicted) for the optimized structures of Eu(nal)<sub>2</sub> and Eu(nal)<sub>3</sub>.

| Assignment                            | Eu(nal) <sub>2</sub>             |                                                                         | Eu(nal) <sub>3</sub>    |                                                                         |
|---------------------------------------|----------------------------------|-------------------------------------------------------------------------|-------------------------|-------------------------------------------------------------------------|
|                                       | Experimental                     | Predicted                                                               | Experimental            | Predicted                                                               |
| v(O-H);<br>COOH, H <sub>2</sub> O     | 3395 wb                          | 2871 w<br>2739 w                                                        | 3399 wb                 | 2850 w<br>2815 w<br>2724 m                                              |
| v (CH <sub>3</sub> -CH <sub>2</sub> ) | 2981 w<br>2931 w                 | 2780 m<br>2779 m                                                        | 2971 w<br>2921 w        | 2780 m<br>2775 m                                                        |
| v as (COO <sup>-</sup> )              | 1615 s                           | 1888 s<br>1871 s                                                        | 1615 s                  | 1882 s<br>1862 s                                                        |
| Pyridonic v(C=O)                      | 1567 s                           | 1757 s                                                                  | 1558 s                  | 1768 s<br>1742 s                                                        |
| Pyridonic v (C-N)                     | 1523 s                           | 1590 m                                                                  | 1523 s                  | 1588 m                                                                  |
| v s (COO <sup>-</sup> )               | 1442 s                           | 1388 s<br>1365 w                                                        | 1441 s                  | 1381 s<br>1372 s                                                        |
| δ (COO <sup>-</sup> )                 | 781 w<br>756 m<br>703 w          | 850 w<br>758 w                                                          | 782 w<br>757 m<br>703 w | 759 w<br>745 w<br>721 w                                                 |
| Ring deformation                      | 657 m<br>635 w<br>541 m<br>469 m | Numerous peaks of weak intensity in the 800-400 cm <sup>-1</sup> range. | 657 m<br>635 w<br>541 m | Numerous peaks of weak intensity in the 800-400 cm <sup>-1</sup> range. |
| v (M-O)                               | 559 m<br>491 s                   | 633 m<br>596 w<br>562 w<br>276 w                                        | 463 m<br>433 m          | 627 w<br>450 w<br>276 w                                                 |

w = weak, m = medium, s = sharp, b = broad

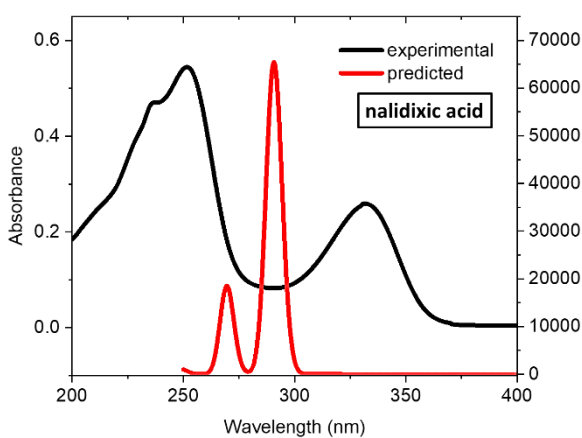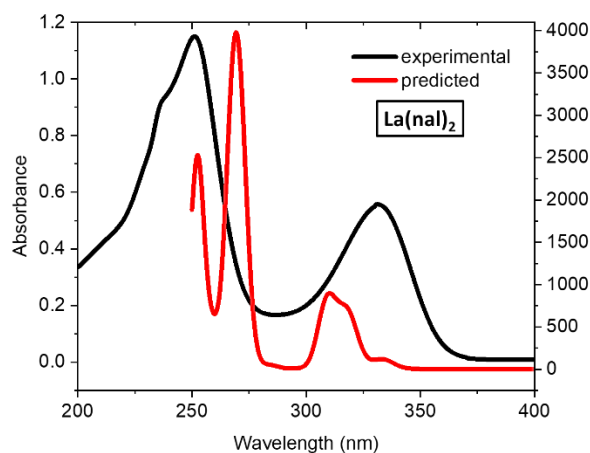

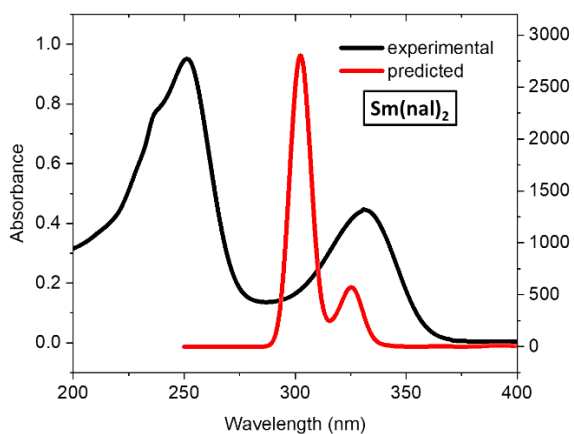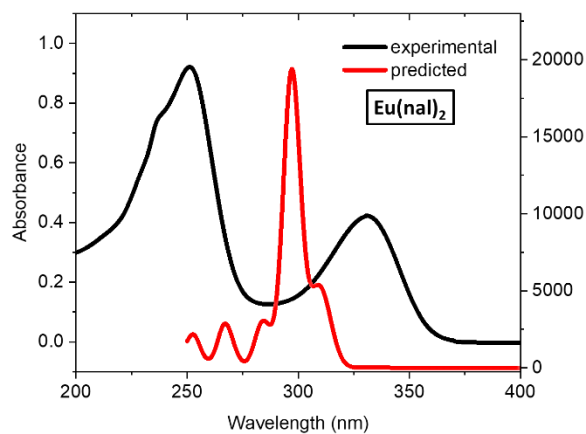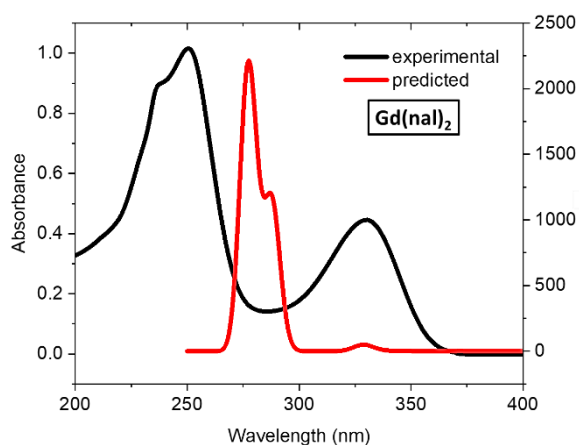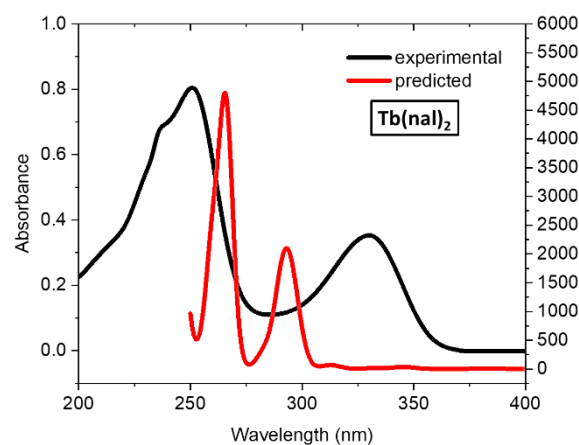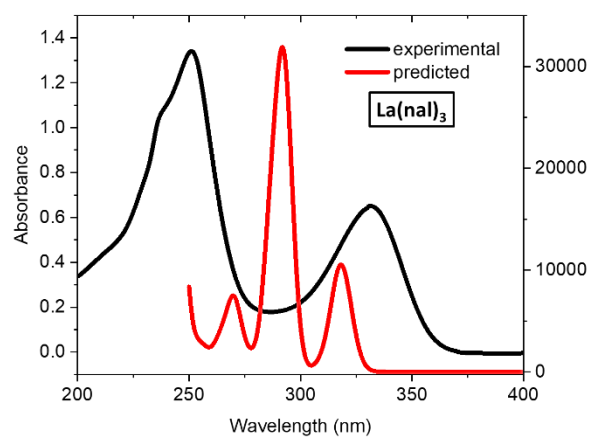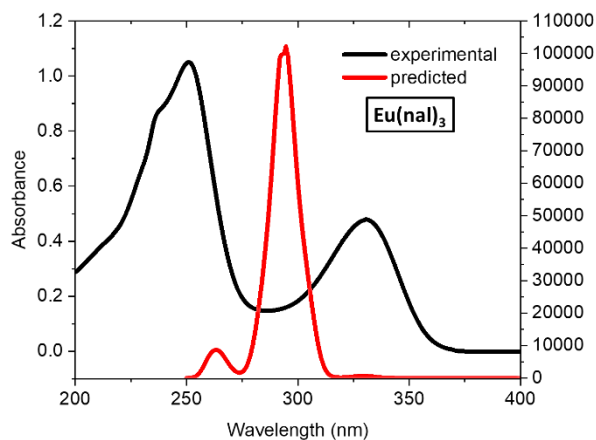

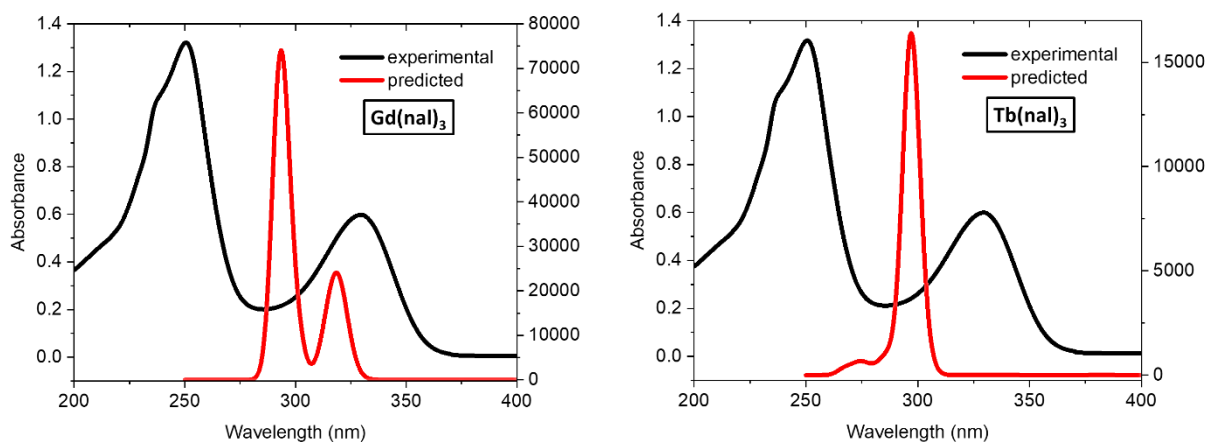

**Figure S7.** Experimental and predicted electronic spectra of nalidixic acid and its metal complexes.

**Table S8.** UV-Vis spectral data for nalidixic acid and complexes (experimental vs. predicted).

| Compound             | Band I (nm)           |                                     | Band II (nm) |                       |
|----------------------|-----------------------|-------------------------------------|--------------|-----------------------|
|                      | Experimental          | Predicted                           | Experimental | Predicted             |
| Nalidixic acid       | 253 (shoulder at 238) | 270                                 | 335          | 291                   |
| La(nal) <sub>2</sub> | 252 (shoulder at 236) | 270<br>253                          | 332          | 311 (shoulder at 318) |
| Sm(nal) <sub>2</sub> | 253 (shoulder at 238) | 302                                 | 334          | 326                   |
| Eu(nal) <sub>2</sub> | 253 (shoulder at 237) | 297 (shoulder at 284)<br>268<br>253 | 333          | 310                   |
| Gd(nal) <sub>2</sub> | 251 (shoulder at 236) | 292                                 | 333          | 303<br>351            |
| Tb(nal) <sub>2</sub> | 251 (shoulder at 236) | 265                                 | 332          | 294                   |
| La(nal) <sub>3</sub> | 251 (shoulder at 237) | 292<br>270                          | 333          | 319                   |
| Eu(nal) <sub>3</sub> | 252 (shoulder at 237) | 295<br>264                          | 334          | 328                   |
| Gd(nal) <sub>3</sub> | 252 (shoulder at 237) | 294                                 | 331          | 320                   |
| Tb(nal) <sub>3</sub> | 252 (shoulder at 236) | 273                                 | 333          | 297                   |

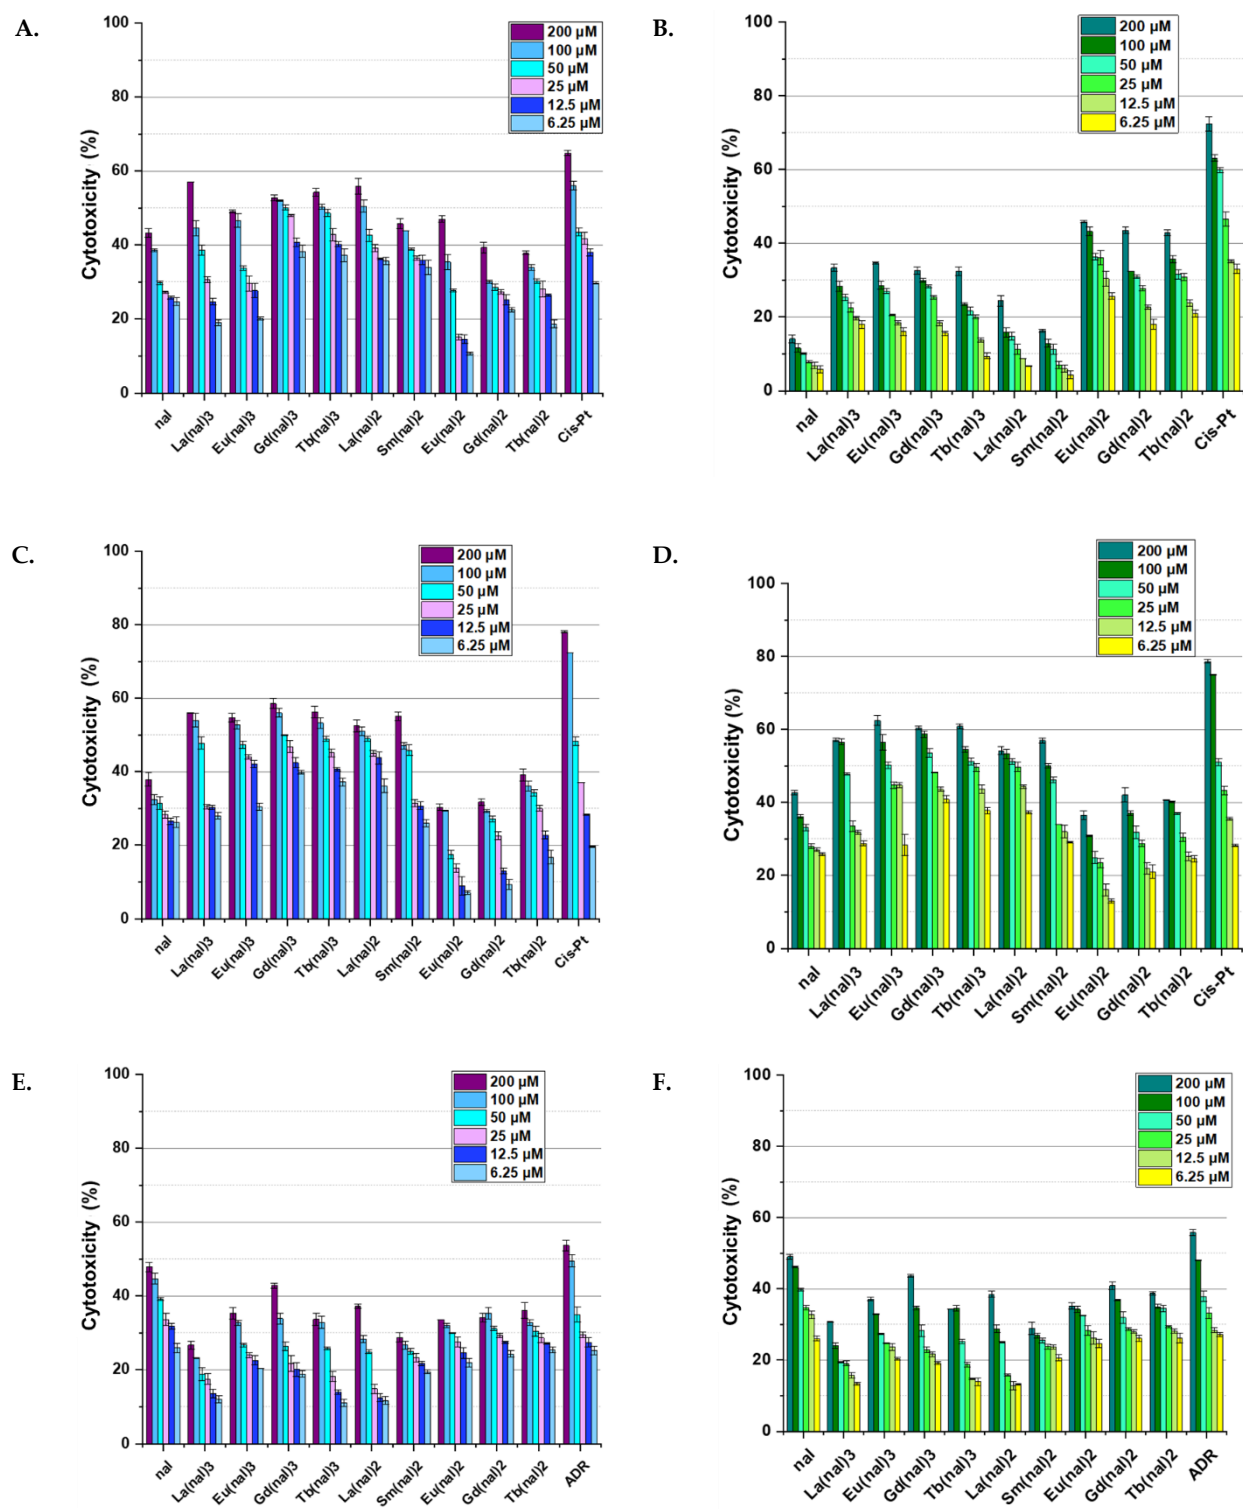

**Figure S8.** Cytotoxicity of  $M(\text{nal})_2$  ( $M = \text{La}^{3+}, \text{Sm}^{3+}, \text{Eu}^{3+}, \text{Gd}^{3+}, \text{Tb}^{3+}$ ) and  $M(\text{nal})_3$  ( $M = \text{La}^{3+}, \text{Eu}^{3+}, \text{Gd}^{3+}, \text{Tb}^{3+}$ ) complexes tested on the following cell lines: **A.** HUVEC – 24h, **B.** HUVEC- 48h, **C.** LoVo – 24h, **D.** LoVo-48h, **E.** MDA-MB 231- 24h and **F.** MDA-MB 231- 48h.



LoVo

$\text{La}(\text{nal})_2$

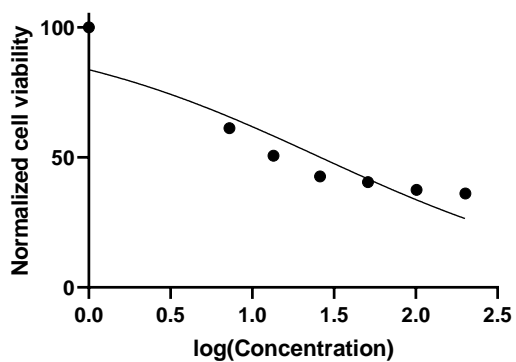

$\text{Sm}(\text{nal})_2$

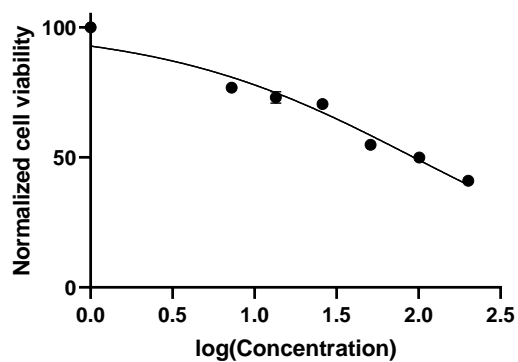

$\text{La}(\text{nal})_3$

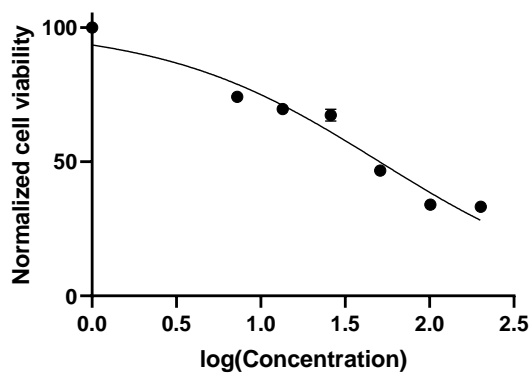

$\text{Eu}(\text{nal})_3$

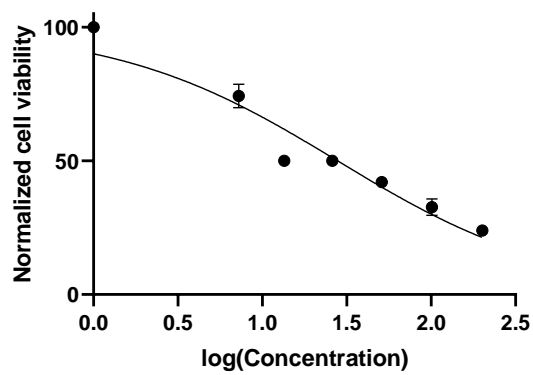

$\text{Gd}(\text{nal})_3$

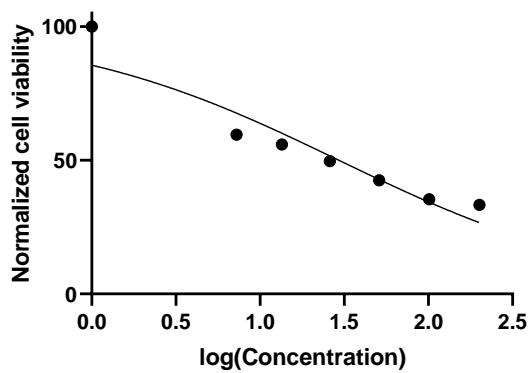

$\text{Tb}(\text{nal})_3$

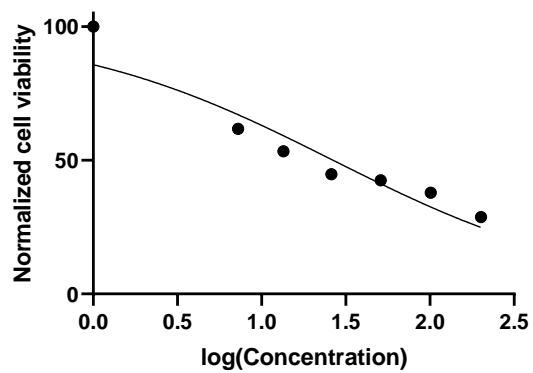

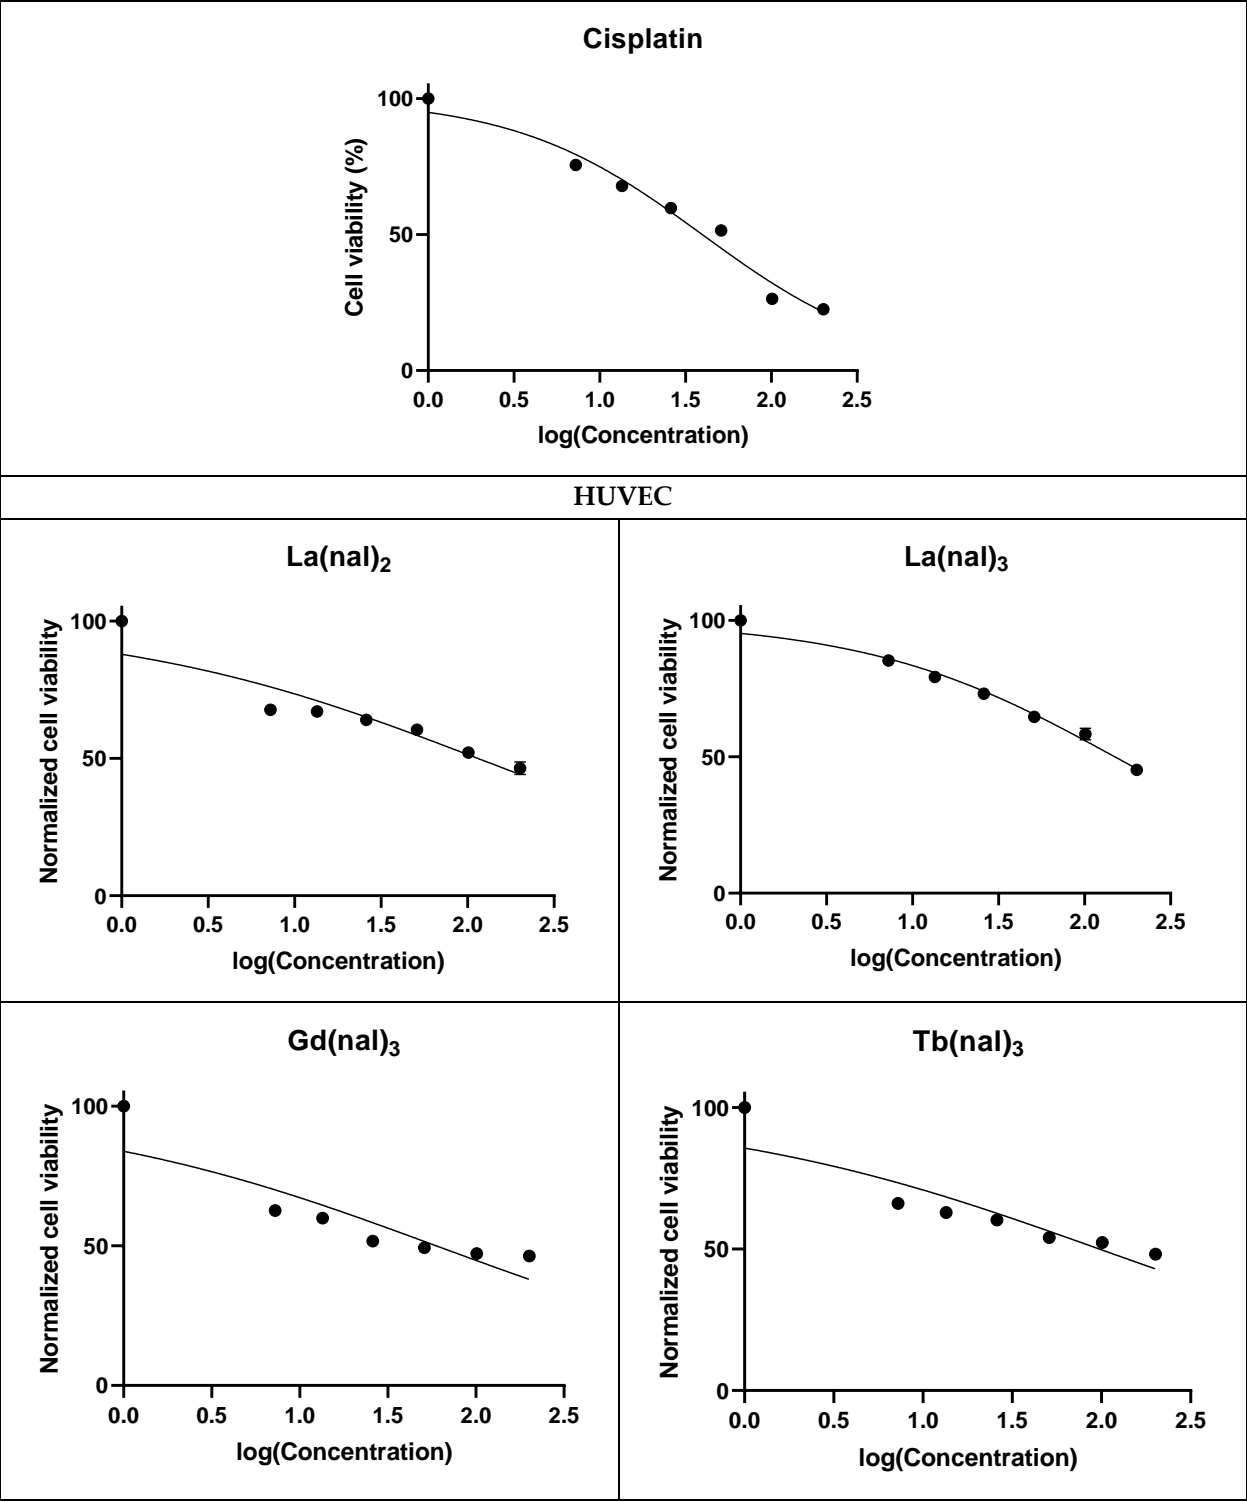

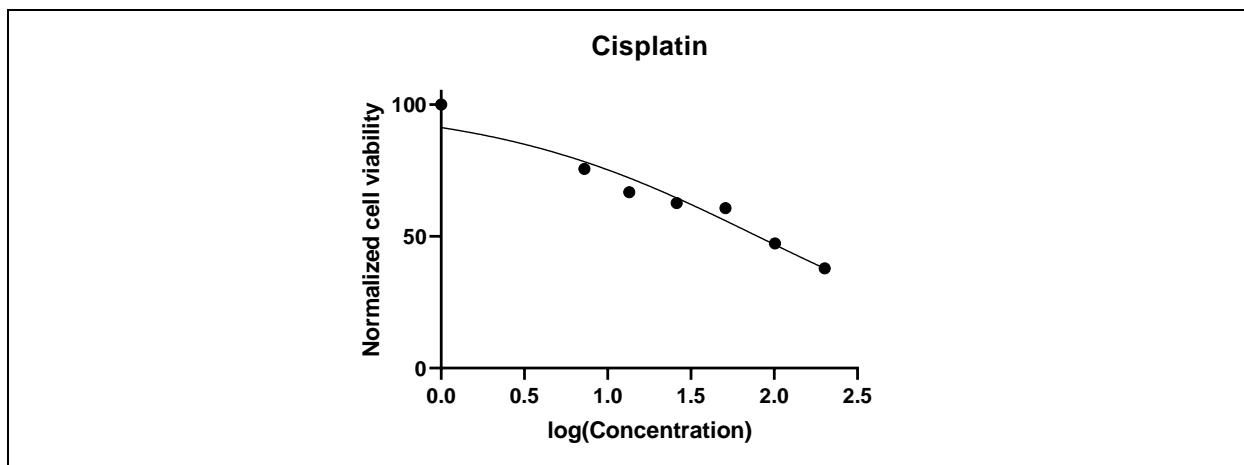

**Figure S9.** Graphical representations of normalized cell viability *vs.* log(Concentration). Concentrations were expressed in  $\mu\text{M}$  and transformed to the corresponding logarithmic values. Data were normalized against the smallest value of cell viability in this data set, corresponding to cisplatin. Results were plotted in GraphPad Prism 8.0.1 using the built-in equation Nonlinear regression (curve fit) – log(inhibitor) *vs.* normalized response variable slope.

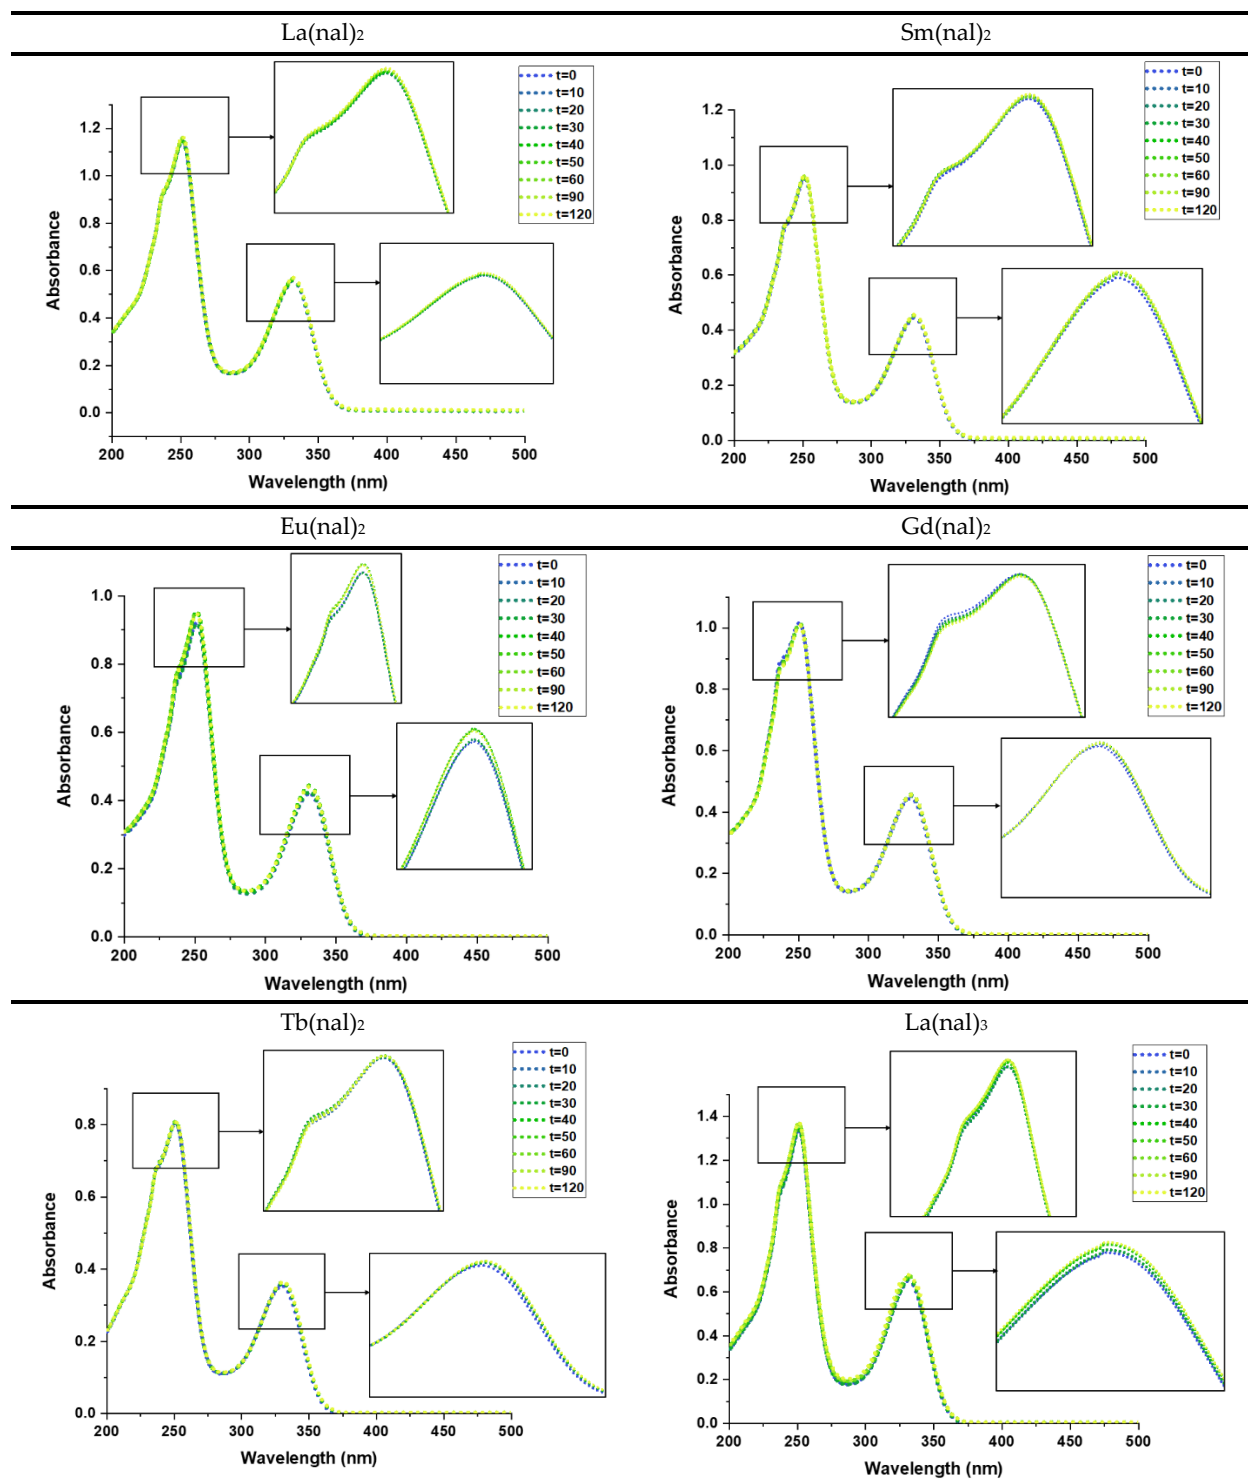

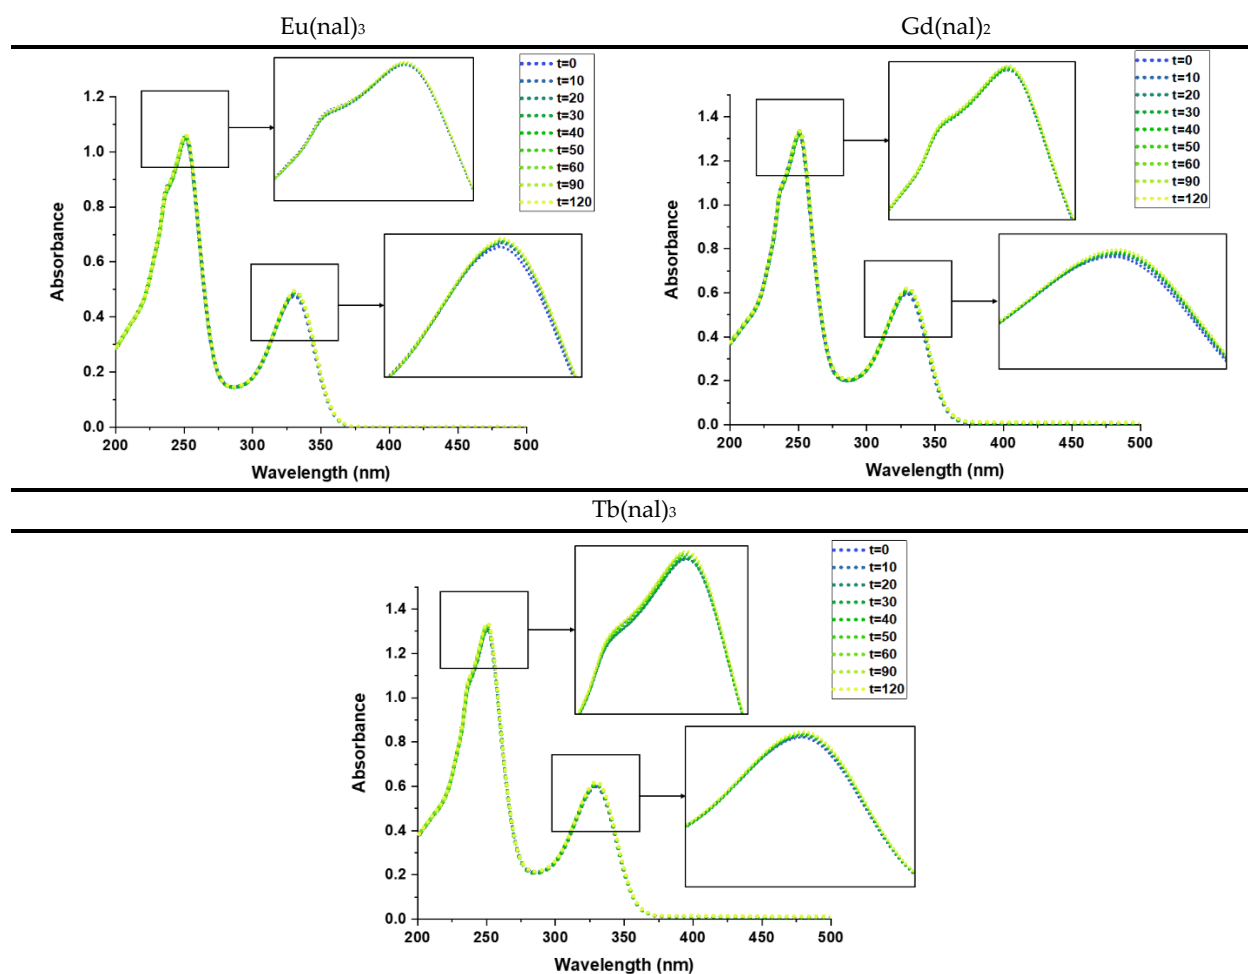

**Figure S10.** Stability assay: UV-vis spectra of the complexes in DMSO-TrisHCl buffer mixture (5 mM Tris-HCl/ 50 mM NaCl, pH 7.4).

**Table S9.** Absorbances of tested compounds in UV-Vis, in DMSO-TrisHCl buffer, [compound]= 20 $\mu$ M.

| <b>t (min)</b>  | <b><math>\lambda</math> (nm)</b> | <b>0</b> | <b>10</b> | <b>20</b> | <b>30</b> | <b>60</b> | <b>90</b> | <b>120</b> |
|-----------------|----------------------------------|----------|-----------|-----------|-----------|-----------|-----------|------------|
| <b>La(nal)2</b> | <b>251</b>                       | 1.150    | 1.147     | 1.147     | 1.149     | 1.152     | 1.155     | 1.158      |
|                 | <b>331</b>                       | 0.557    | 0.557     | 0.558     | 0.560     | 0.561     | 0.565     | 0.566      |
| <b>Sm(nal)2</b> | <b>251.5</b>                     | 0.951    | 0.957     | 0.959     | 0.958     | 0.959     | 1.100     | 0.956      |
|                 | <b>331</b>                       | 0.446    | 0.453     | 0.455     | 0.455     | 0.456     | 0.482     | 0.452      |
| <b>Eu(nal)2</b> | <b>251</b>                       | 0.921    | 0.920     | 0.920     | 0.919     | 0.954     | 0.954     | 0.952      |
|                 | <b>330.5</b>                     | 0.423    | 0.425     | 0.426     | 0.427     | 0.444     | 0.445     | 0.443      |
| <b>Gd(nal)2</b> | <b>251.5</b>                     | 1.015    | 1.013     | 1.014     | 1.013     | 1.013     | 1.015     | 1.012      |
|                 | <b>330.5</b>                     | 0.446    | 0.452     | 0.454     | 0.456     | 0.457     | 0.459     | 0.458      |
| <b>Tb(nal)2</b> | <b>251</b>                       | 0.804    | 0.804     | 0.805     | 0.807     | 0.807     | 0.809     | 0.809      |
|                 | <b>330.5</b>                     | 0.354    | 0.360     | 0.362     | 0.362     | 0.364     | 0.366     | 0.366      |
| <b>La(nal)3</b> | <b>251</b>                       | 1.341    | 1.338     | 1.336     | 1.339     | 1.358     | 1.363     | 1.369      |
|                 | <b>331.5</b>                     | 0.651    | 0.657     | 0.657     | 0.659     | 0.671     | 0.673     | 0.676      |
| <b>Eu(nal)3</b> | <b>251</b>                       | 1.050    | 1.049     | 1.052     | 1.053     | 1.055     | 1.055     | 1.057      |
|                 | <b>331</b>                       | 0.479    | 0.479     | 0.479     | 0.479     | 0.479     | 0.479     | 0.479      |
| <b>Gd(nal)3</b> | <b>250.5</b>                     | 1.321    | 1.318     | 1.320     | 1.323     | 1.325     | 1.331     | 1.335      |
|                 | <b>330.5</b>                     | 0.5974   | 0.605     | 0.609     | 0.612     | 0.614     | 0.622     | 0.623      |
| <b>Tb(nal)3</b> | <b>250.5</b>                     | 1.317    | 1.314     | 1.313     | 1.318     | 1.321     | 1.327     | 1.331      |
|                 | <b>330.5</b>                     | 0.598    | 0.605     | 0.605     | 0.609     | 0.610     | 0.614     | 0.617      |

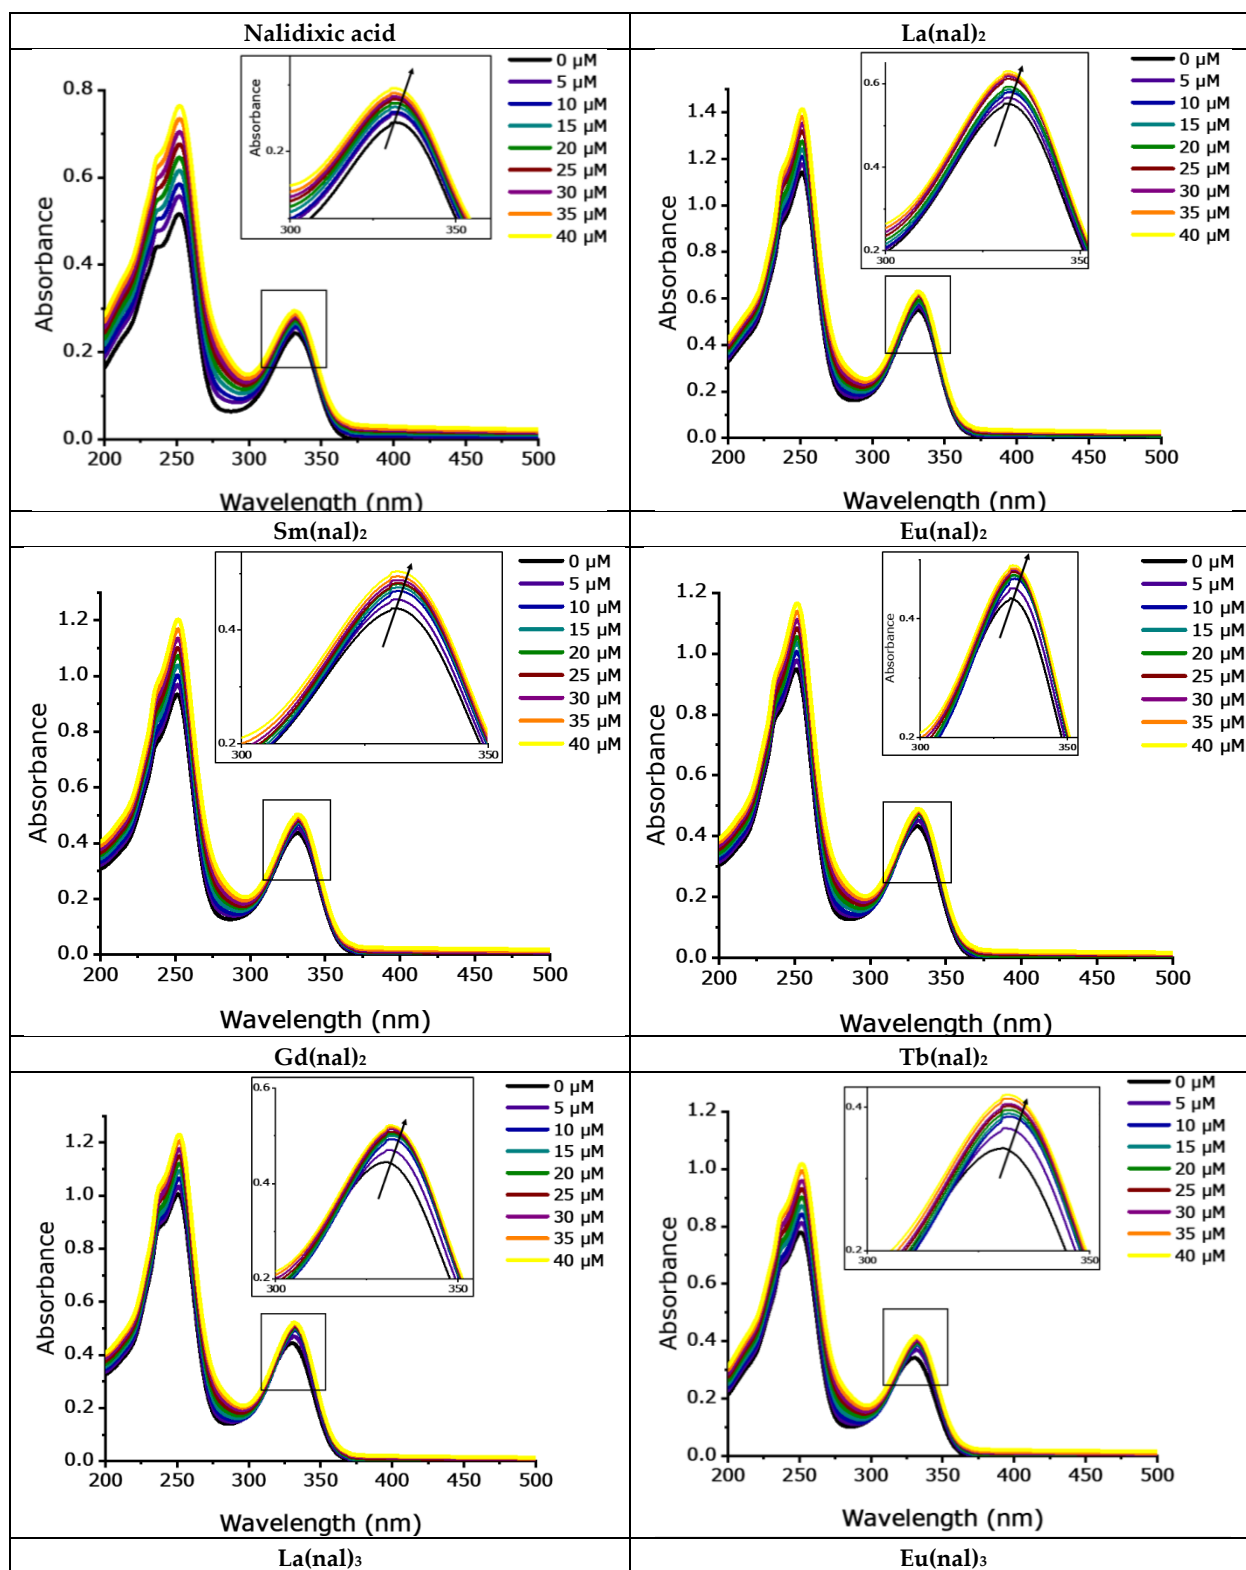

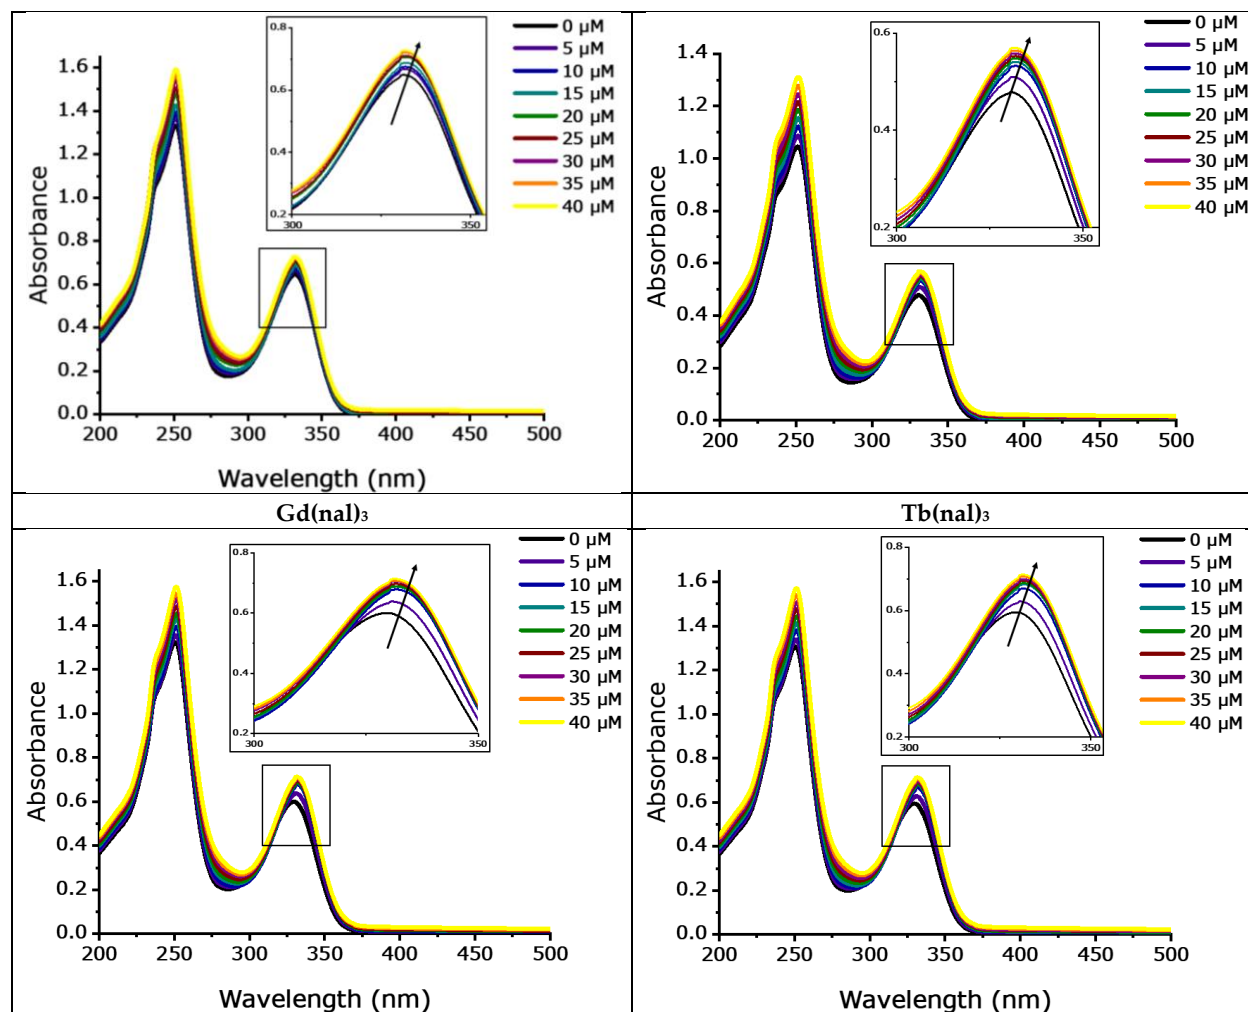

**Figure S11.** Absorption spectra of the tested compounds in the absence and presence of increasing amounts of DNA. [compound] = 20  $\mu\text{M}$ ; [DNA] = 0, 5, 10, 15, 20, 25, 30, 35, 40  $\mu\text{M}$ . The arrows show the absorption changes upon increasing the DNA concentration.



## Nalidixic acid

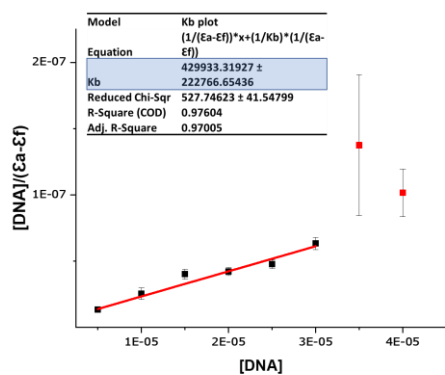

## La(nal)<sub>2</sub>

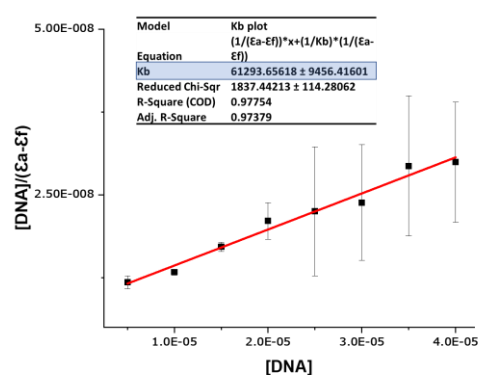

## Sm(nal)<sub>2</sub>

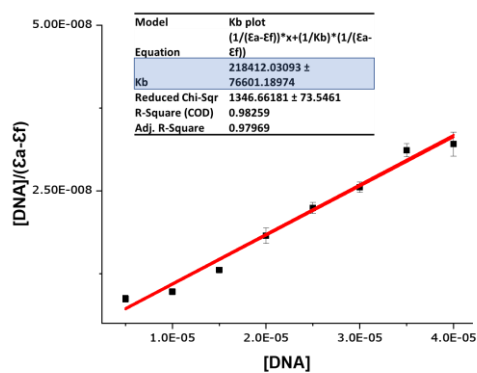

## Eu(nal)<sub>2</sub>

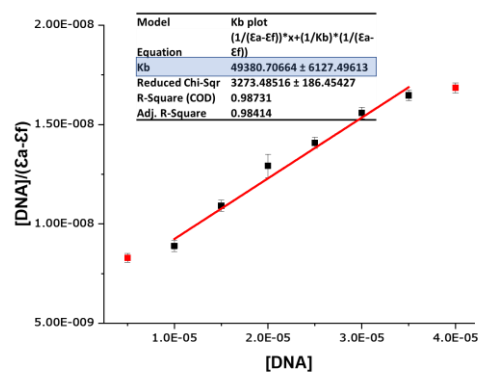

## Gd(nal)<sub>2</sub>

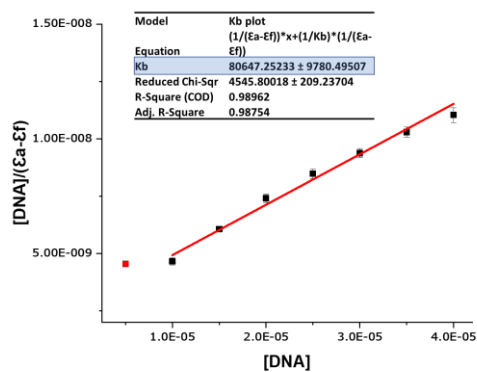

## Tb(nal)<sub>2</sub>

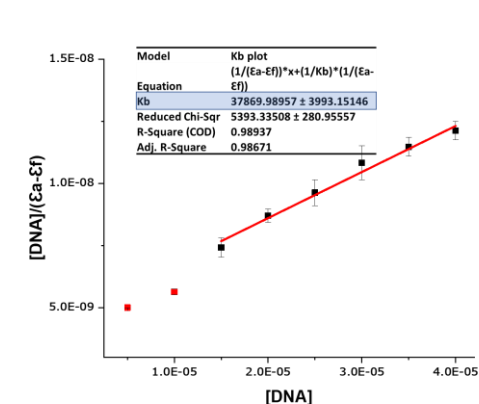

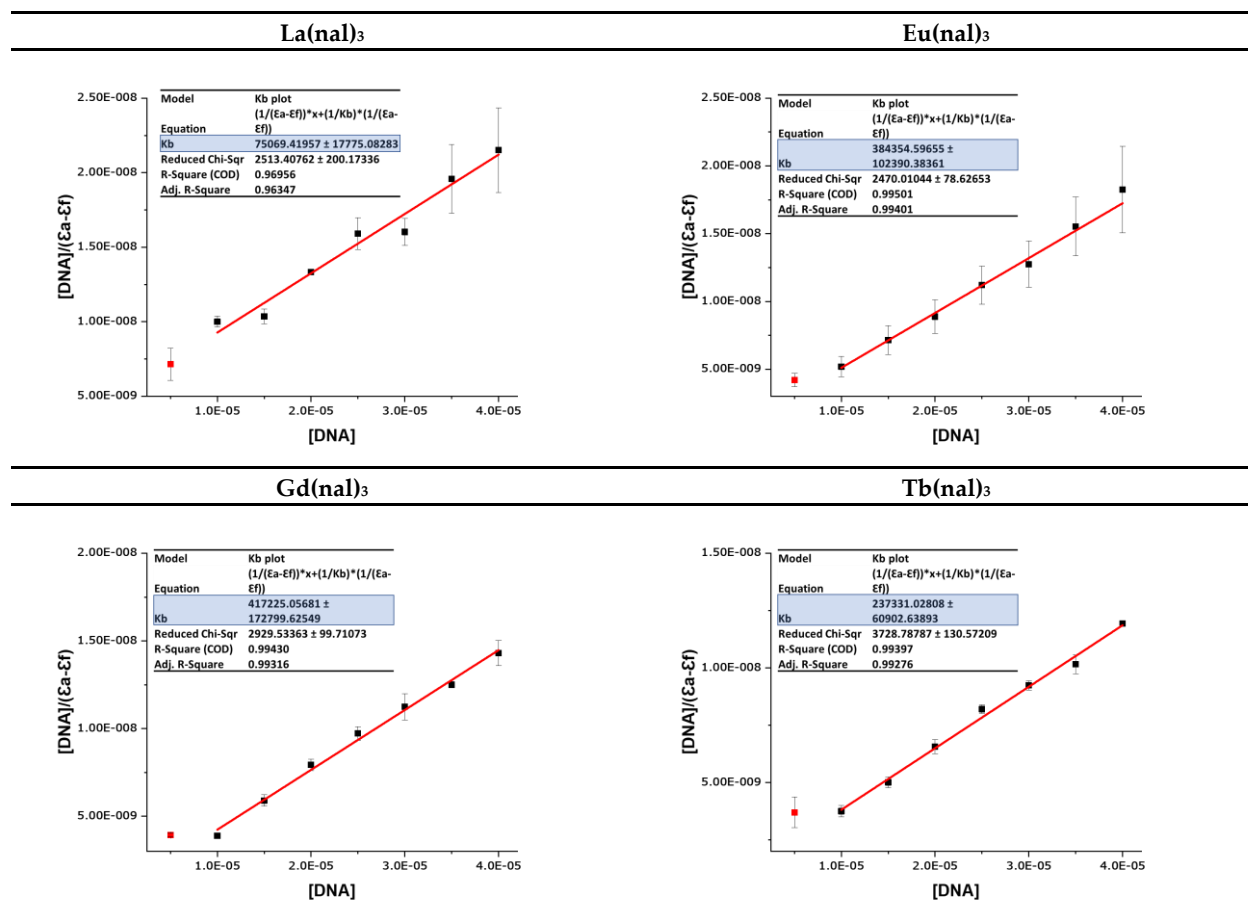

**Figure S12.** Graphical representations of the DNA-binding constants ( $K_b$ ) for systems containing [compound] = 20  $\mu$ M; [DNA] = 5, 10, 15, 20, 25, 30, 35, 40  $\mu$ M.  $K_b$  values were calculated using Equation 2 in OriginPro® 2018. Outliers are represented on the graphs as red data points.

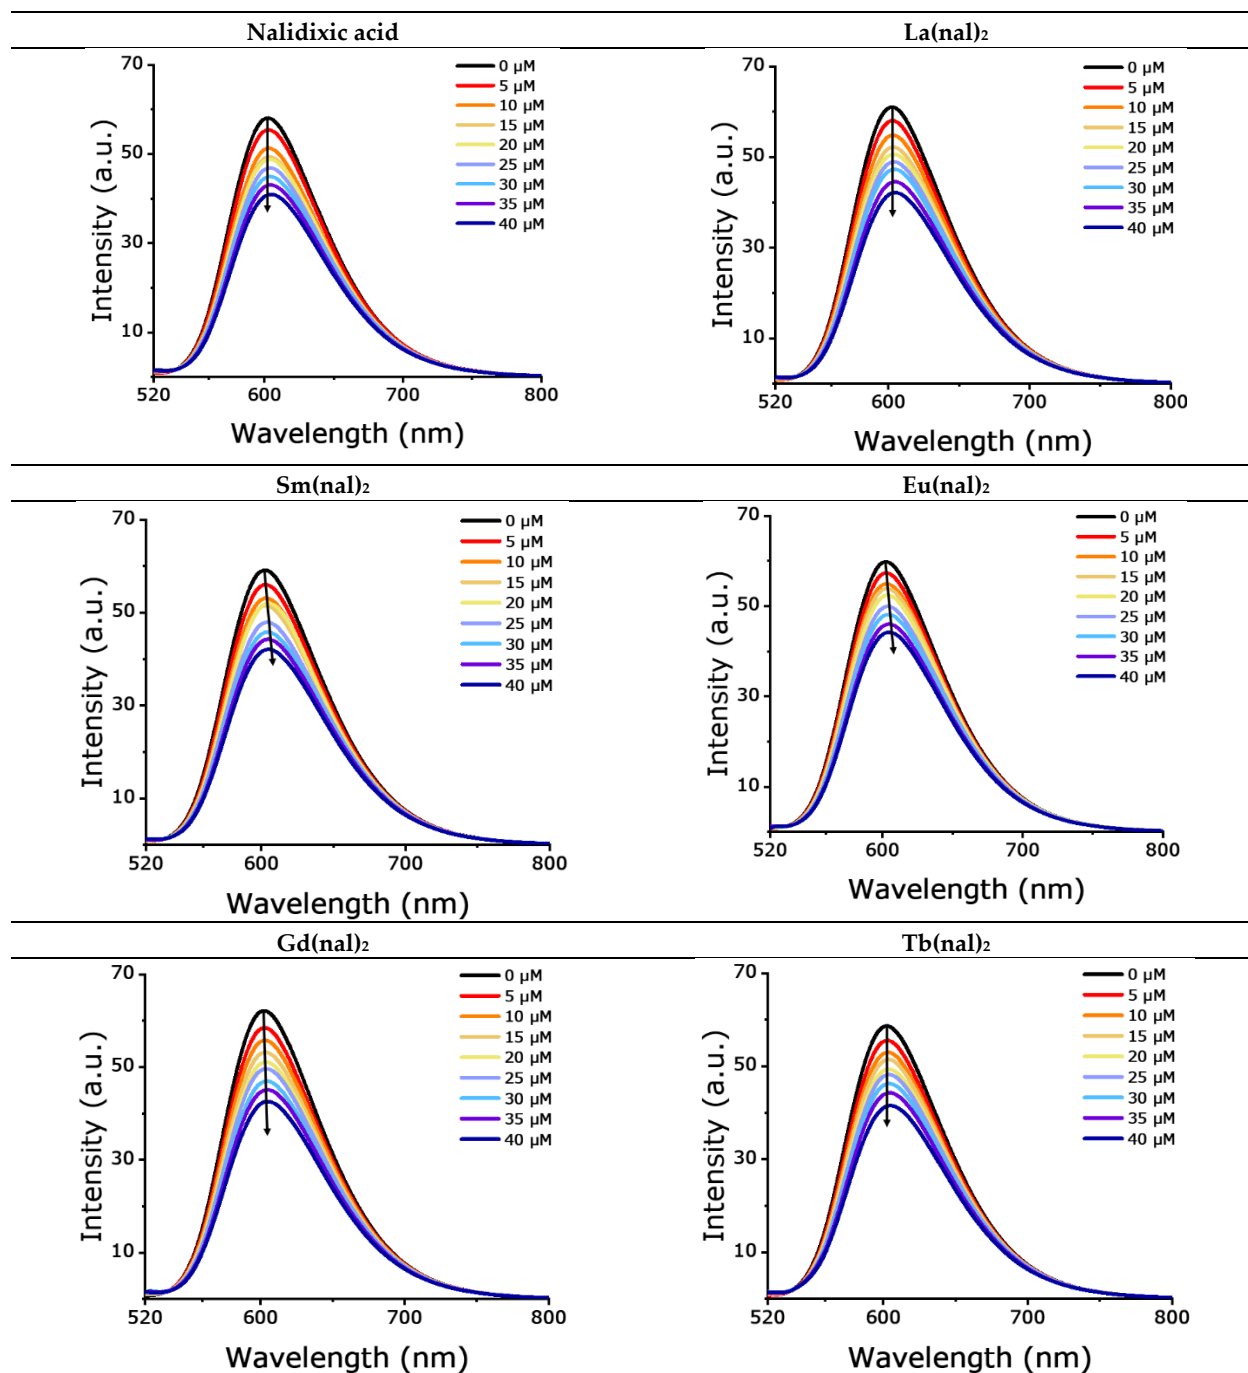

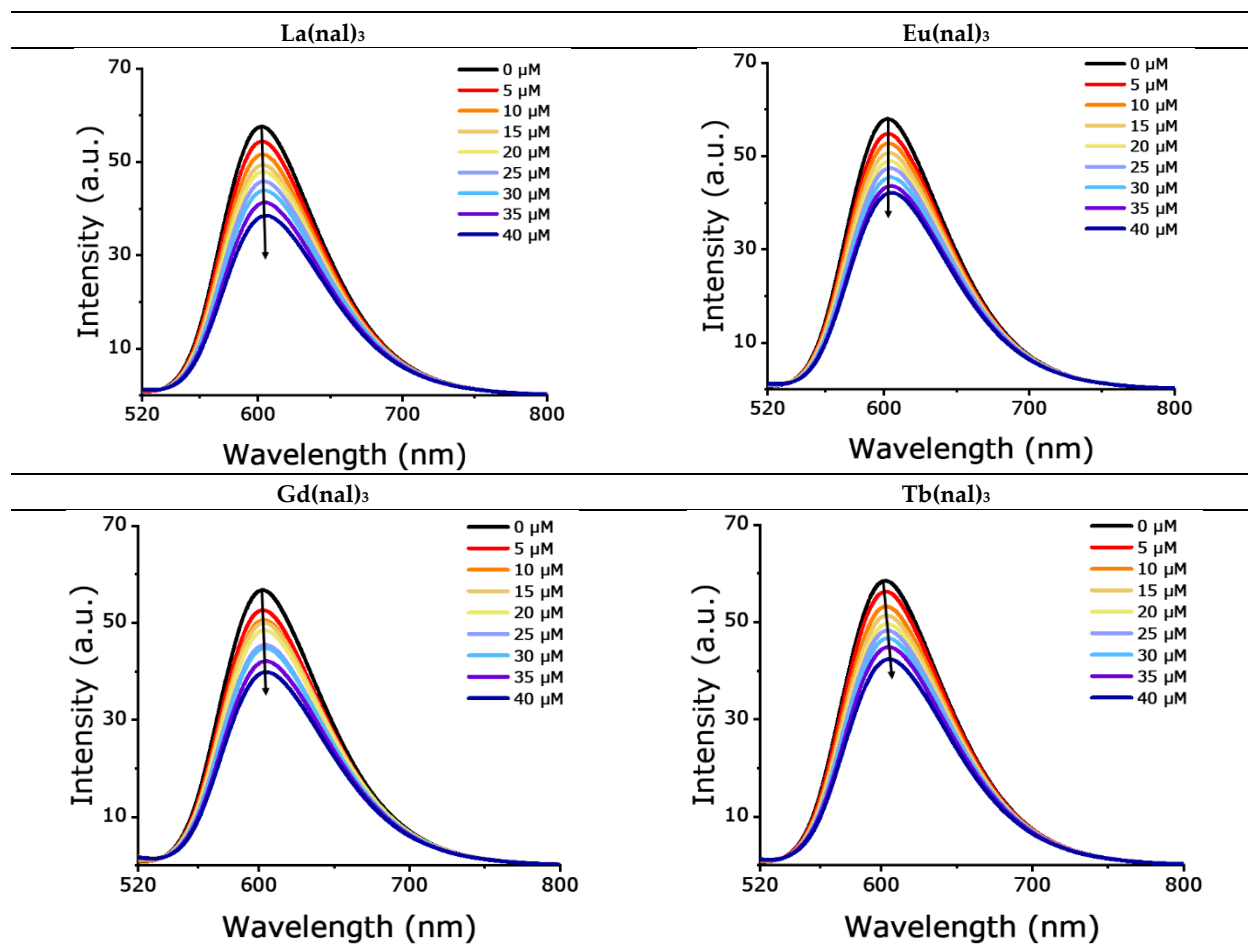

**Figure S13.** Fluorescence spectra of the EB - DNA system in the absence and presence of increasing amounts of the tested compounds.  $\lambda_{\text{ex}} = 500 \text{ nm}$ ,  $[\text{EB}] = 2 \mu\text{M}$ ,  $[\text{DNA}] = 10 \mu\text{M}$ ,  $[\text{compound}] = 0, 5, 10, 15, 20, 25, 30, 35, 40 \mu\text{M}$ . Arrows indicate the changes in fluorescence intensities upon increasing the concentrations of the tested compounds.

Nalidixic acid

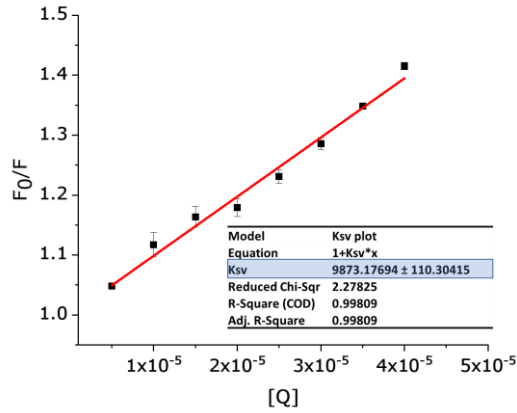La(nal)<sub>2</sub>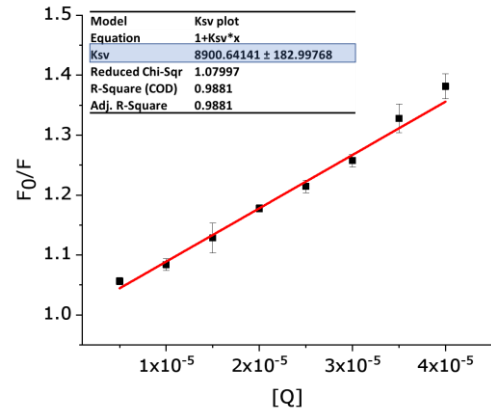Sm(nal)<sub>2</sub>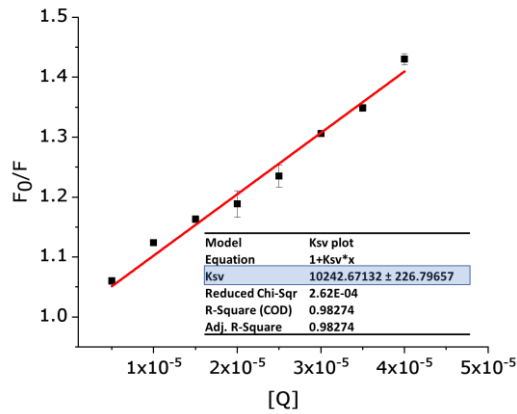Eu(nal)<sub>2</sub>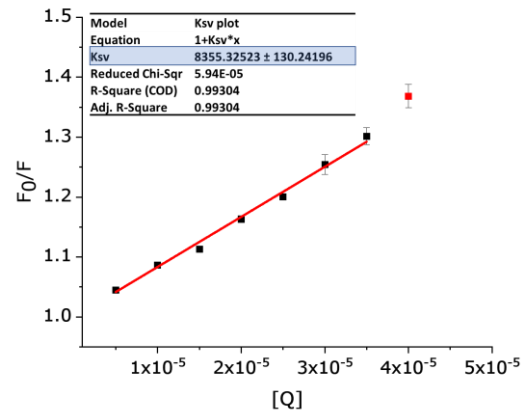Gd(nal)<sub>2</sub>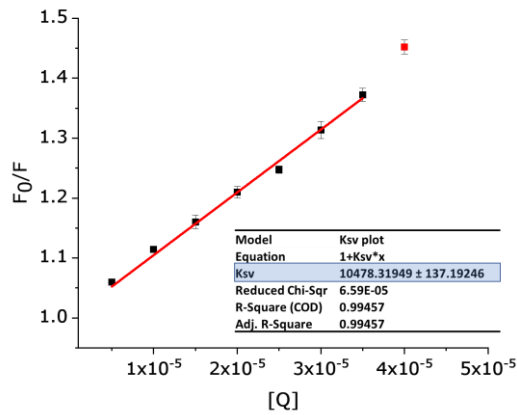Tb(nal)<sub>2</sub>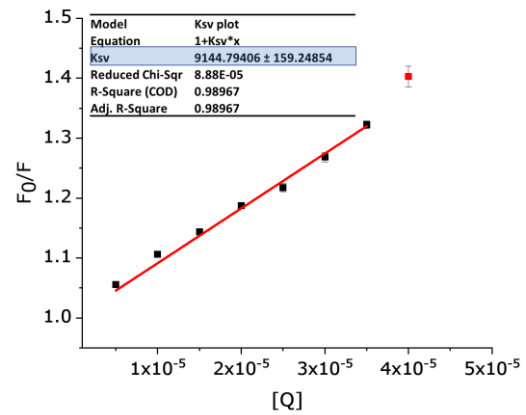

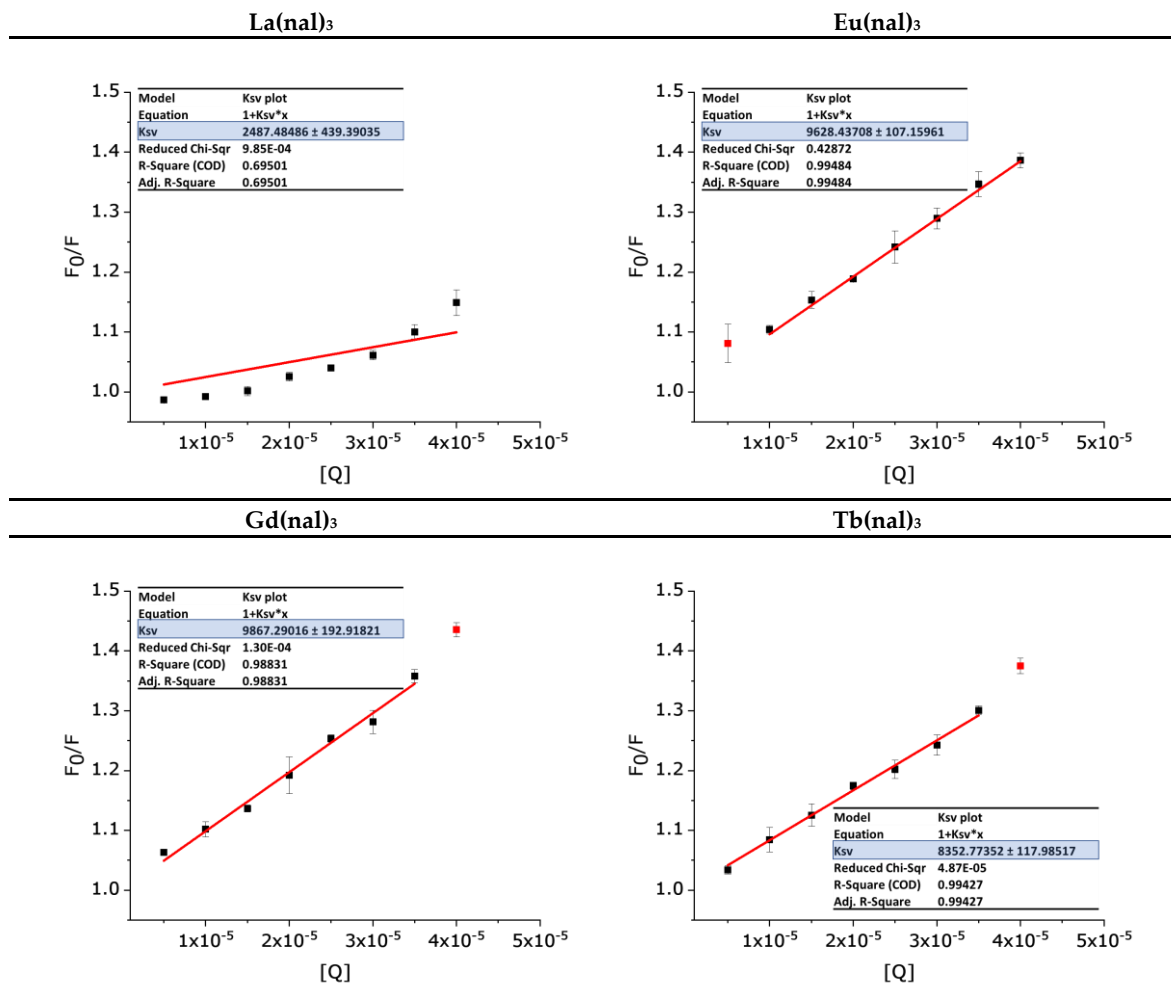

**Figure S14.** Graphical representations of the  $K_{SV}$  constants for systems containing [EB] = 2  $\mu$ M, [DNA] = 10  $\mu$ M, [compound] = 5, 10, 15, 20, 25, 30, 35, 40  $\mu$ M.  $K_{SV}$  values were calculated using Equation 3 in OriginPro® 2018. Outliers are represented on the graphs as red data points.

### Nalidixic acid

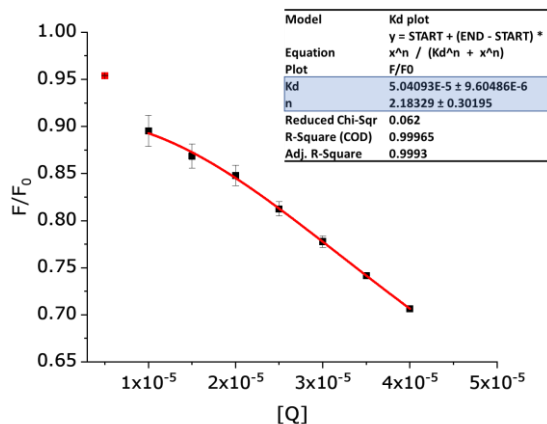

### La(nal)<sub>2</sub>

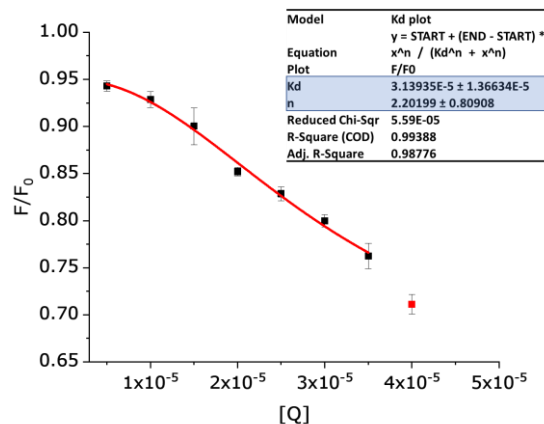

### Sm(nal)<sub>2</sub>

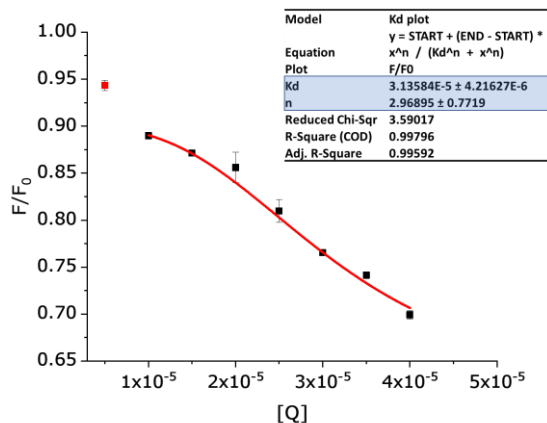

### Eu(nal)<sub>2</sub>

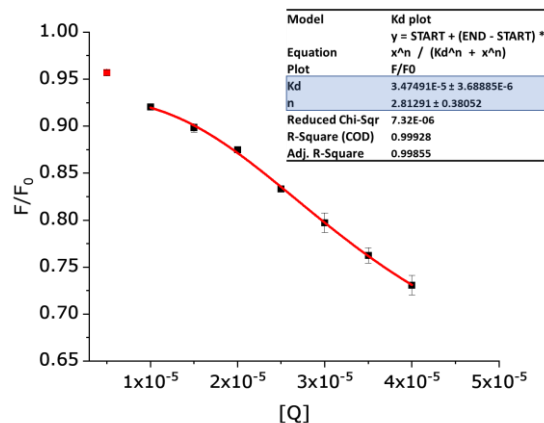

### Gd(nal)<sub>2</sub>

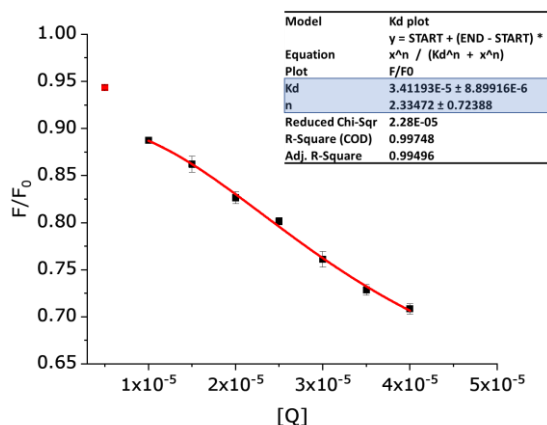

### Tb(nal)<sub>2</sub>

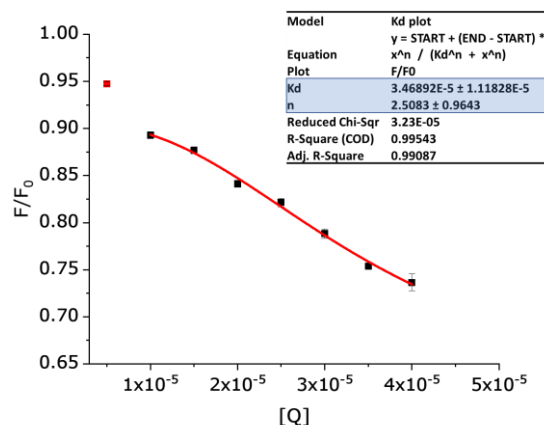

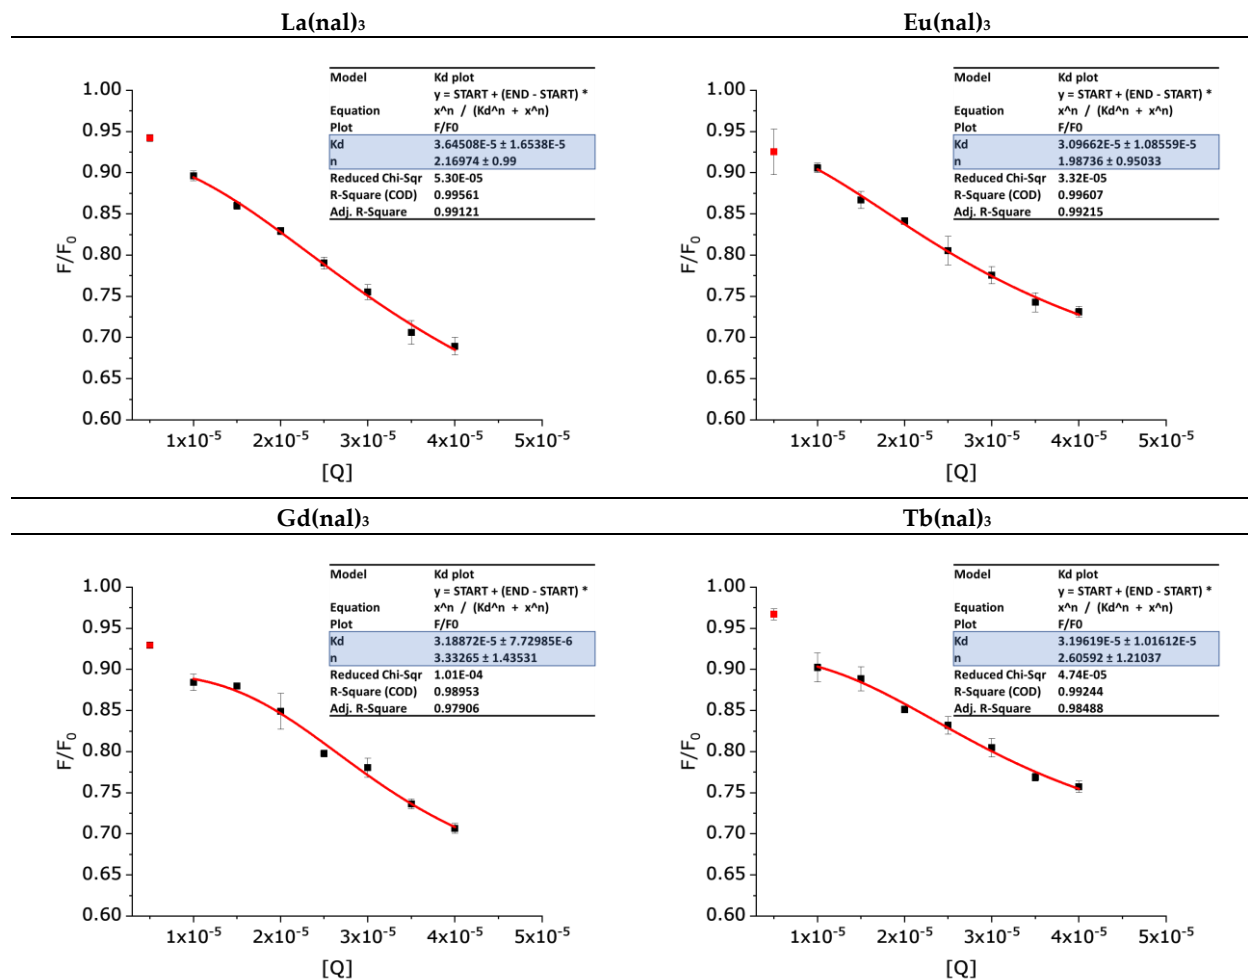

**Figure S15.** Graphical representation of the  $K_{50}$  constants for systems containing [EB] = 2  $\mu\text{M}$ , [DNA] = 10  $\mu\text{M}$ , [compound] = 5, 10, 15, 20, 25, 30, 35, 40  $\mu\text{M}$ .  $K_{50}$  values were calculated using Equation 3 in OriginPro® 2018. Outliers are represented on the graphs as red data points.



Nalidixic acid

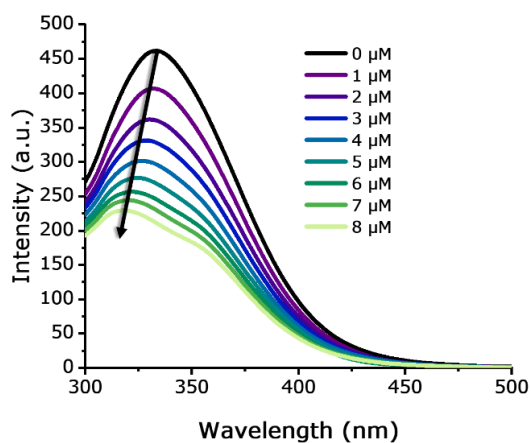 $\text{La}(\text{nal})_2$ 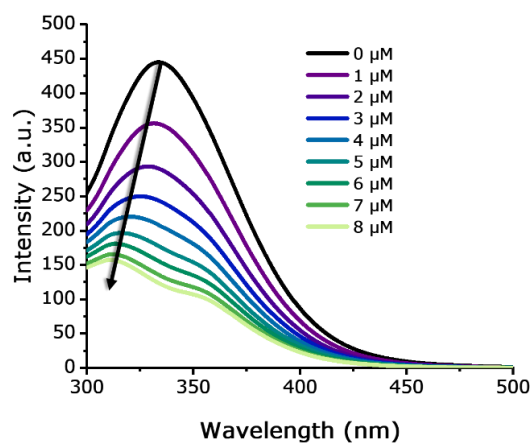 $\text{Sm}(\text{nal})_2$ 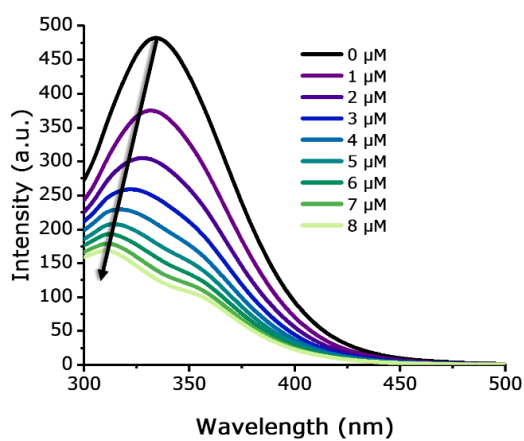 $\text{Eu}(\text{nal})_2$ 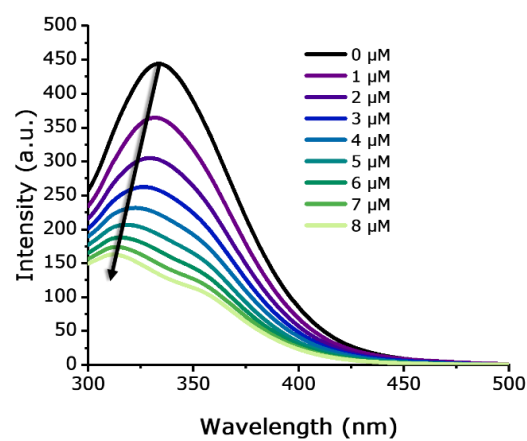 $\text{Gd}(\text{nal})_2$ 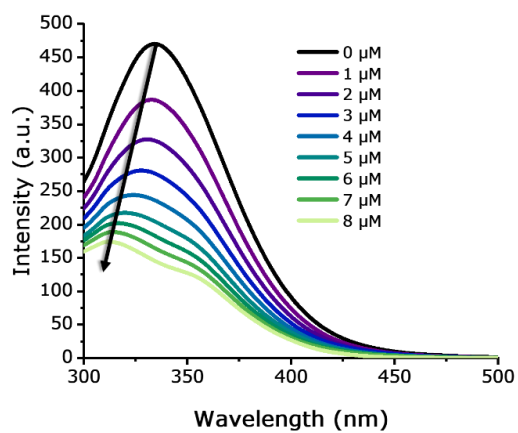 $\text{Tb}(\text{nal})_2$ 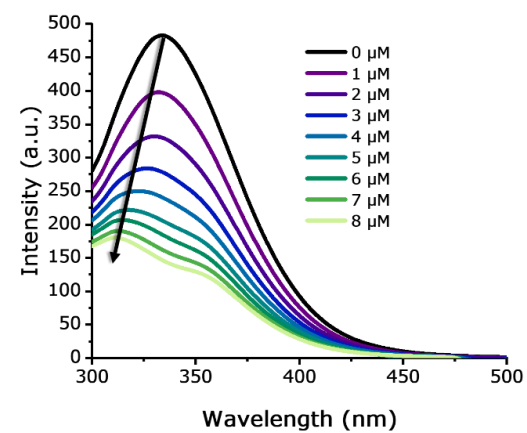

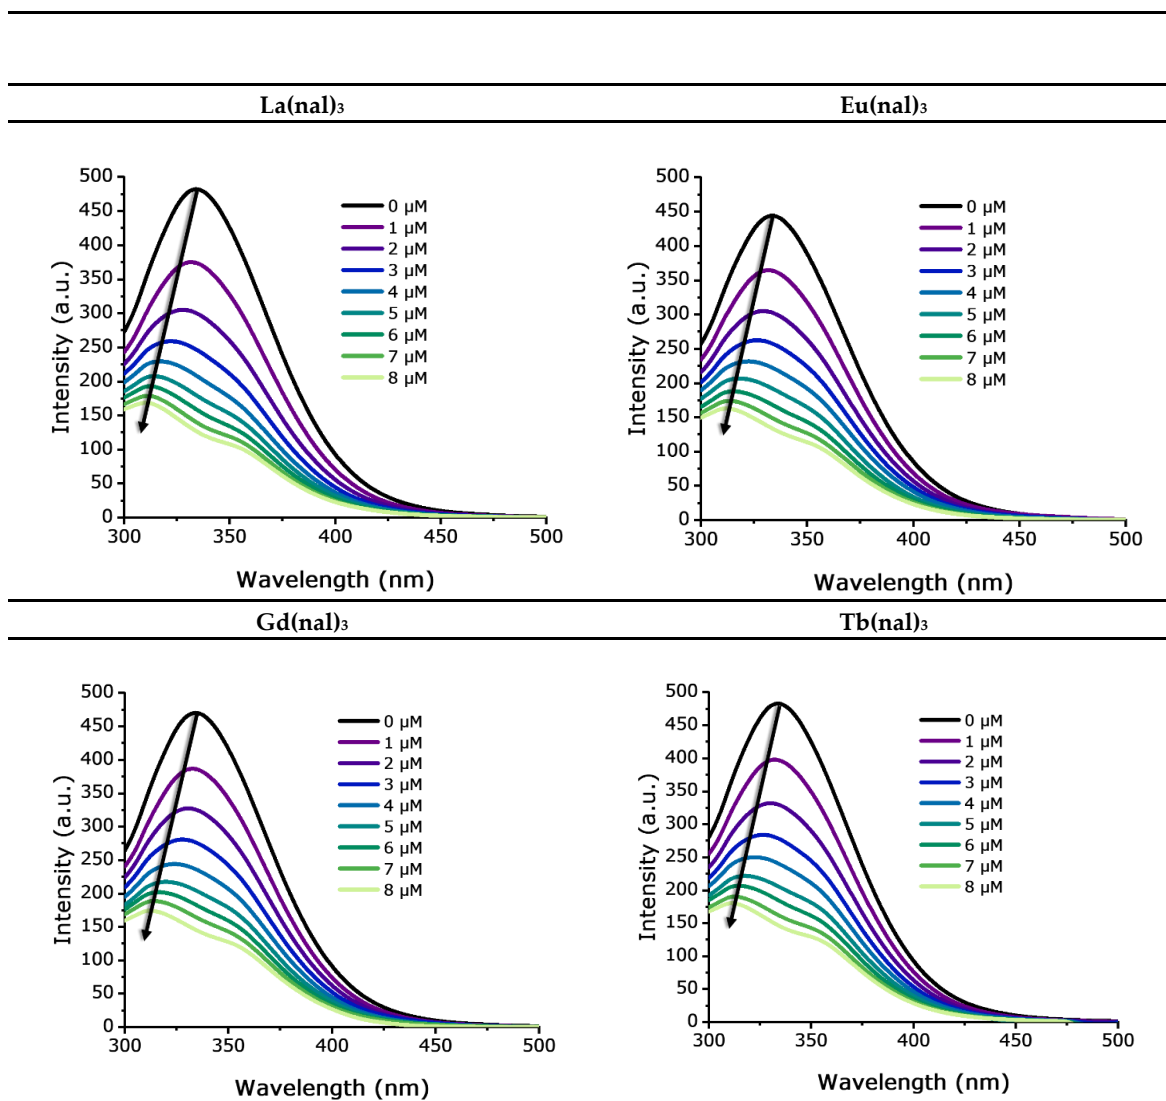

**Figure S16.** Changes in fluorescence intensity of free HSA *vs.* compound-HSA systems; the black arrows indicate a decrease of the intensity upon the addition of increasing amounts of compound; [HSA] = 2.5  $\mu\text{M}$ , [compound] = 0, 1, 2, 3, 4, 5, 6, 7, 8  $\mu\text{M}$ .

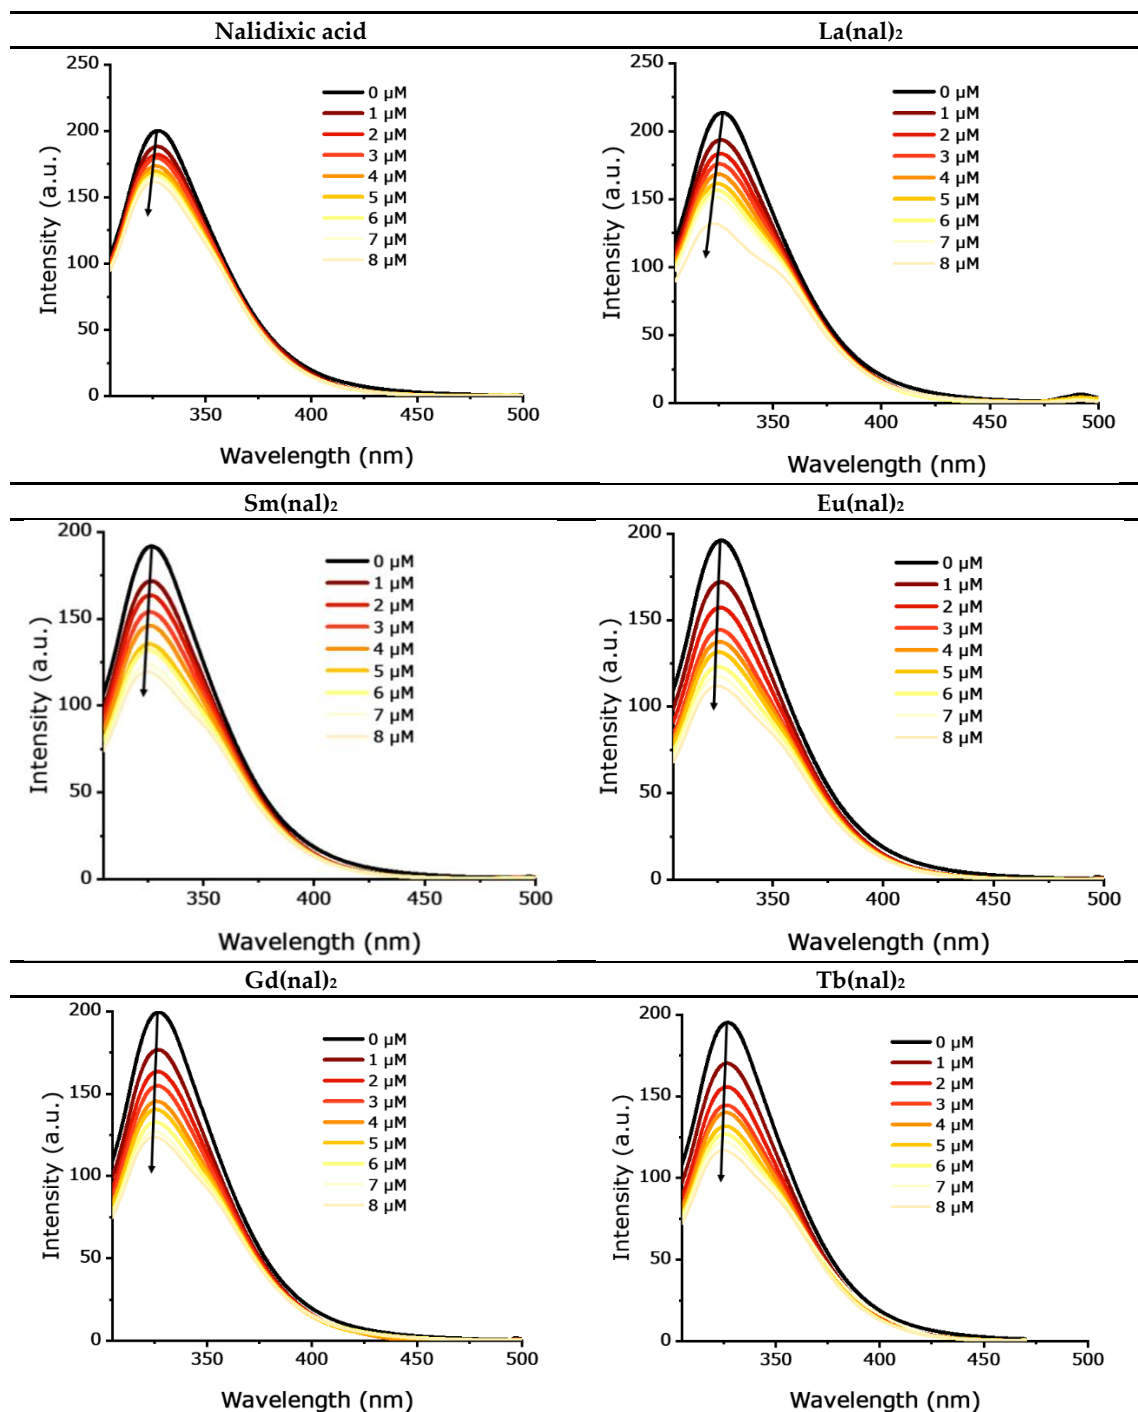

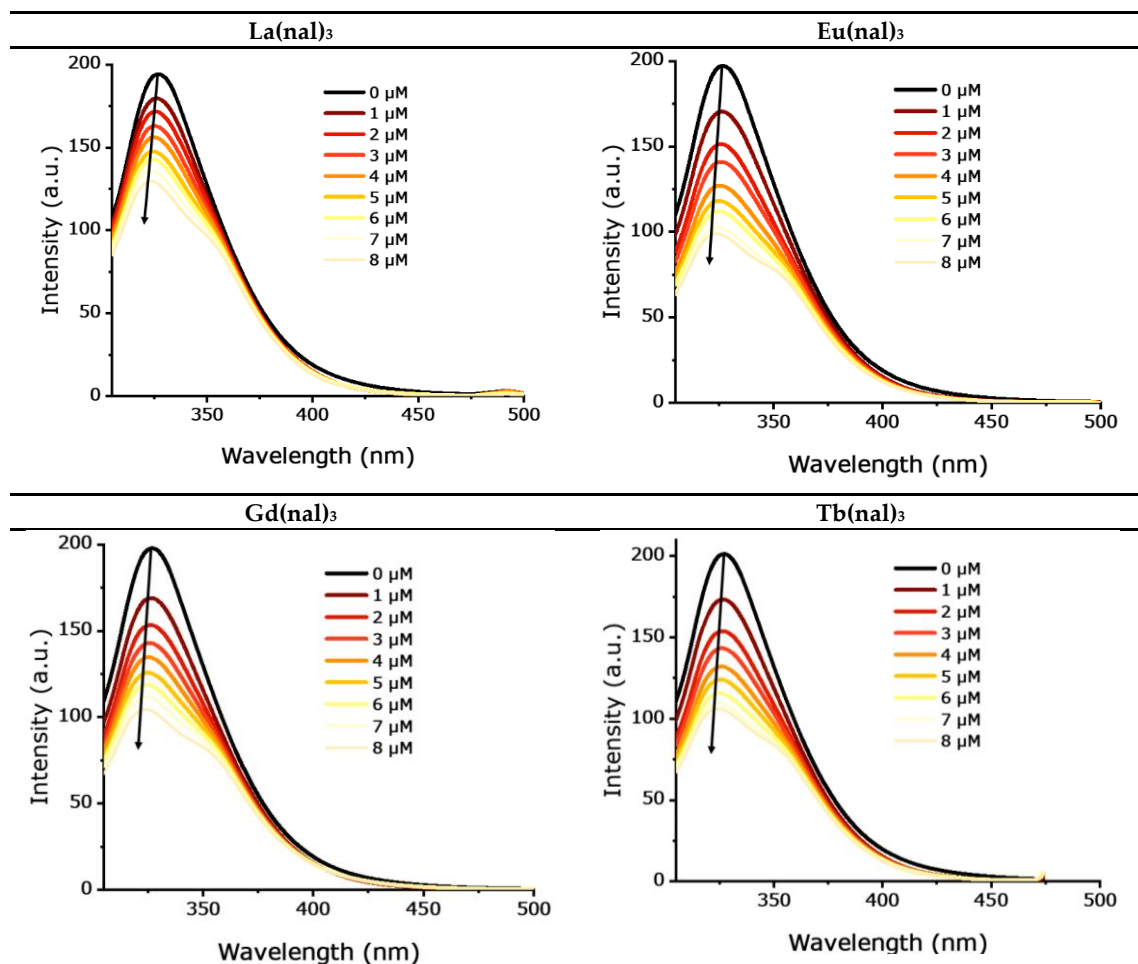

**Figure S17.** Changes in fluorescence intensity of free apo Tf *vs.* compound-apo Tf systems; the black arrows indicate a decrease of the intensity upon the addition of increasing amounts of compound. [apo-Tf] = 1  $\mu\text{M}$ , [compound] = 0, 1, 2, 3, 4, 5, 6, 7, 8  $\mu\text{M}$ .

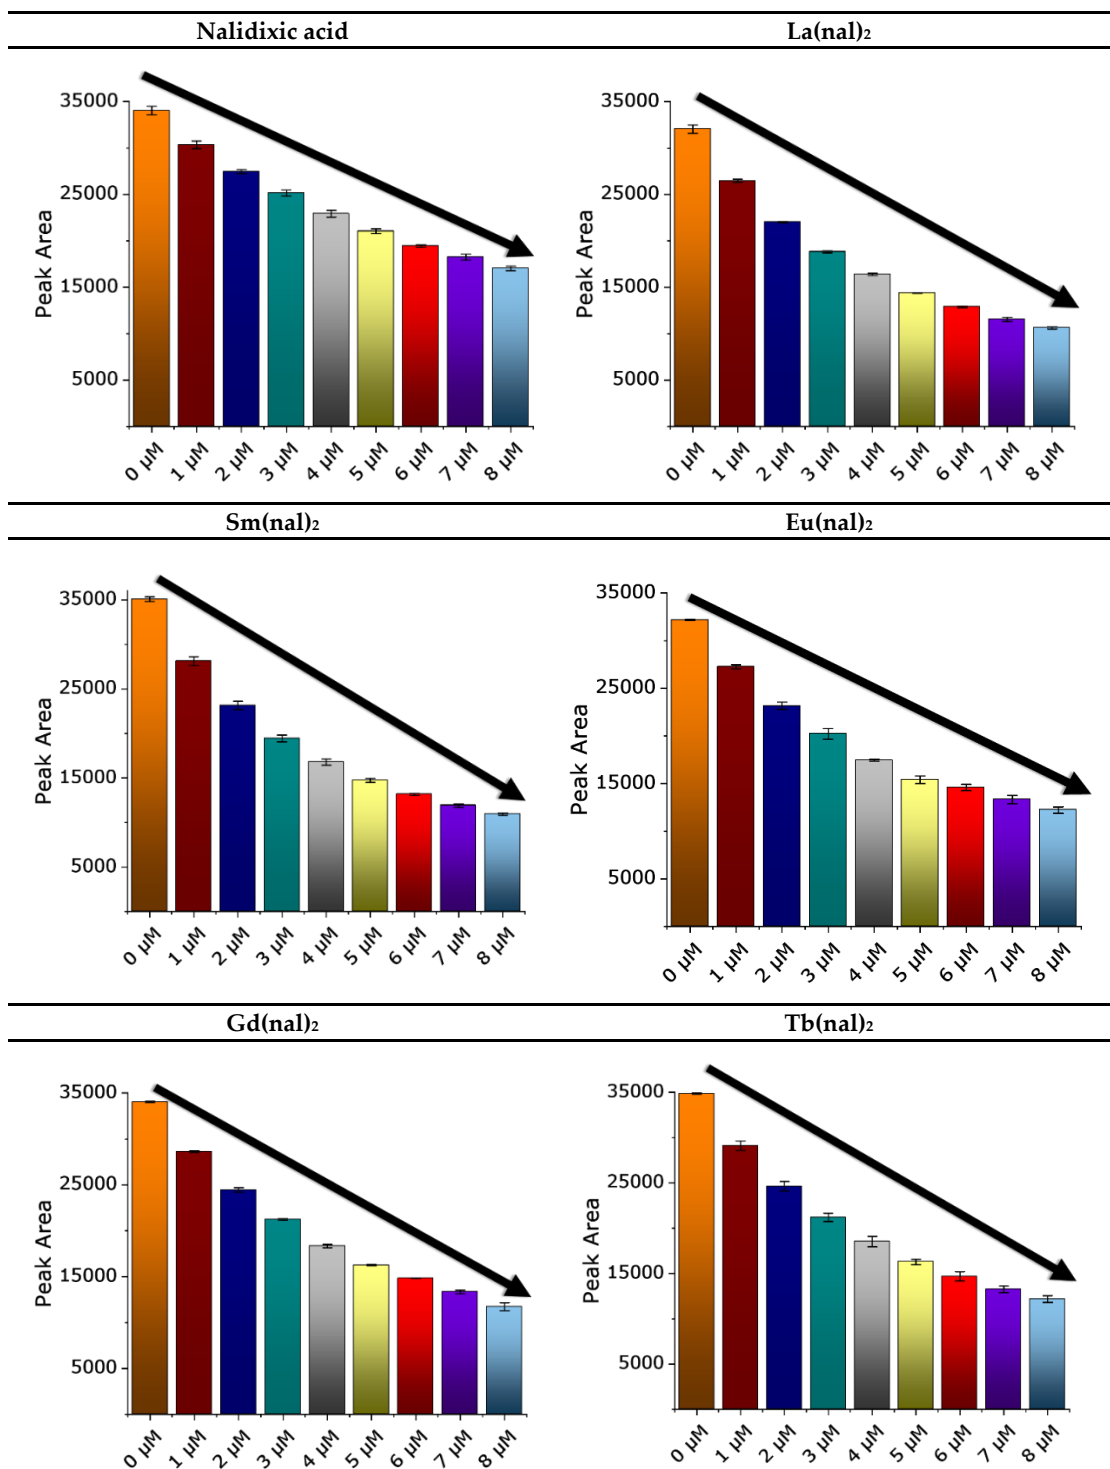

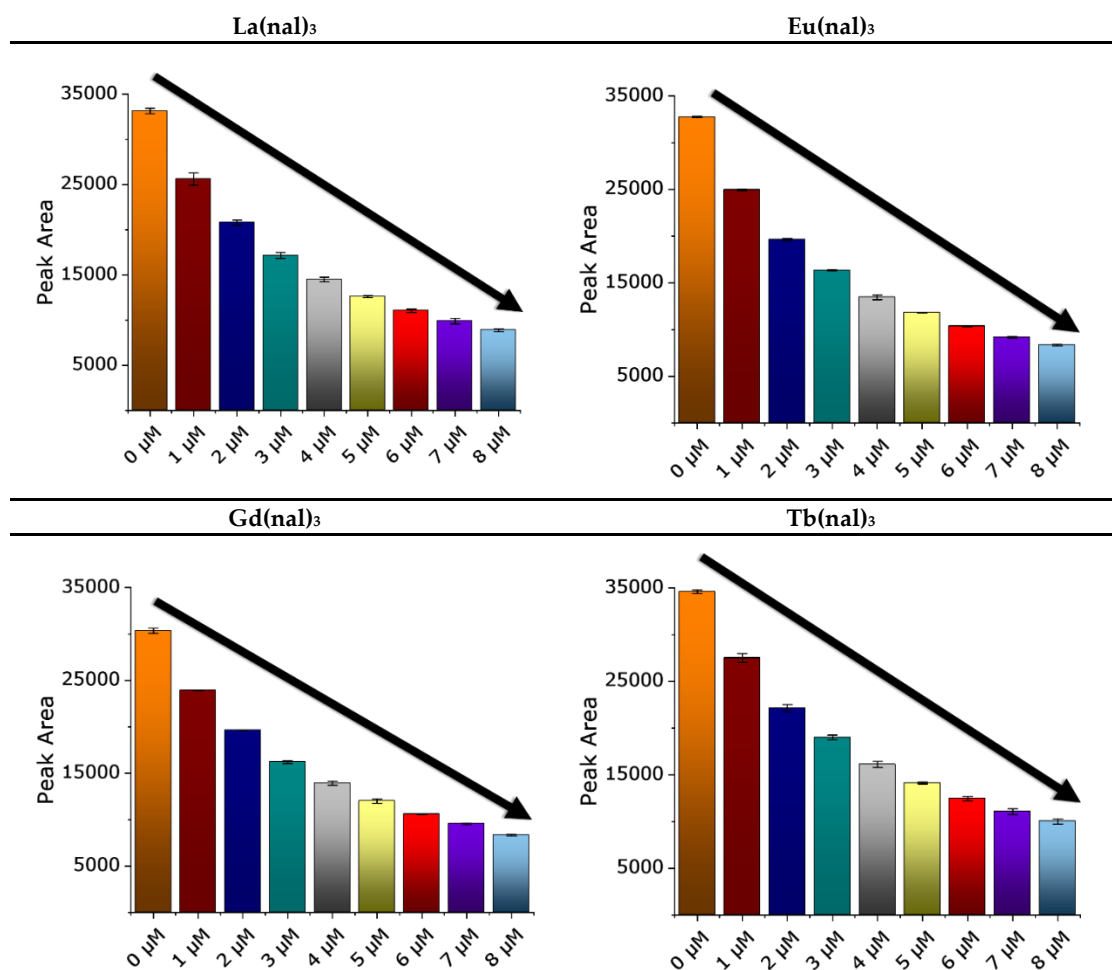

**Figure S18.** Variation of the HSA fluorescence peak area upon adding increasing amounts of the studied compounds. [HSA] = 2.5 μM, [compound] = 0, 1, 2, 3, 4, 5, 6, 7, 8 μM.

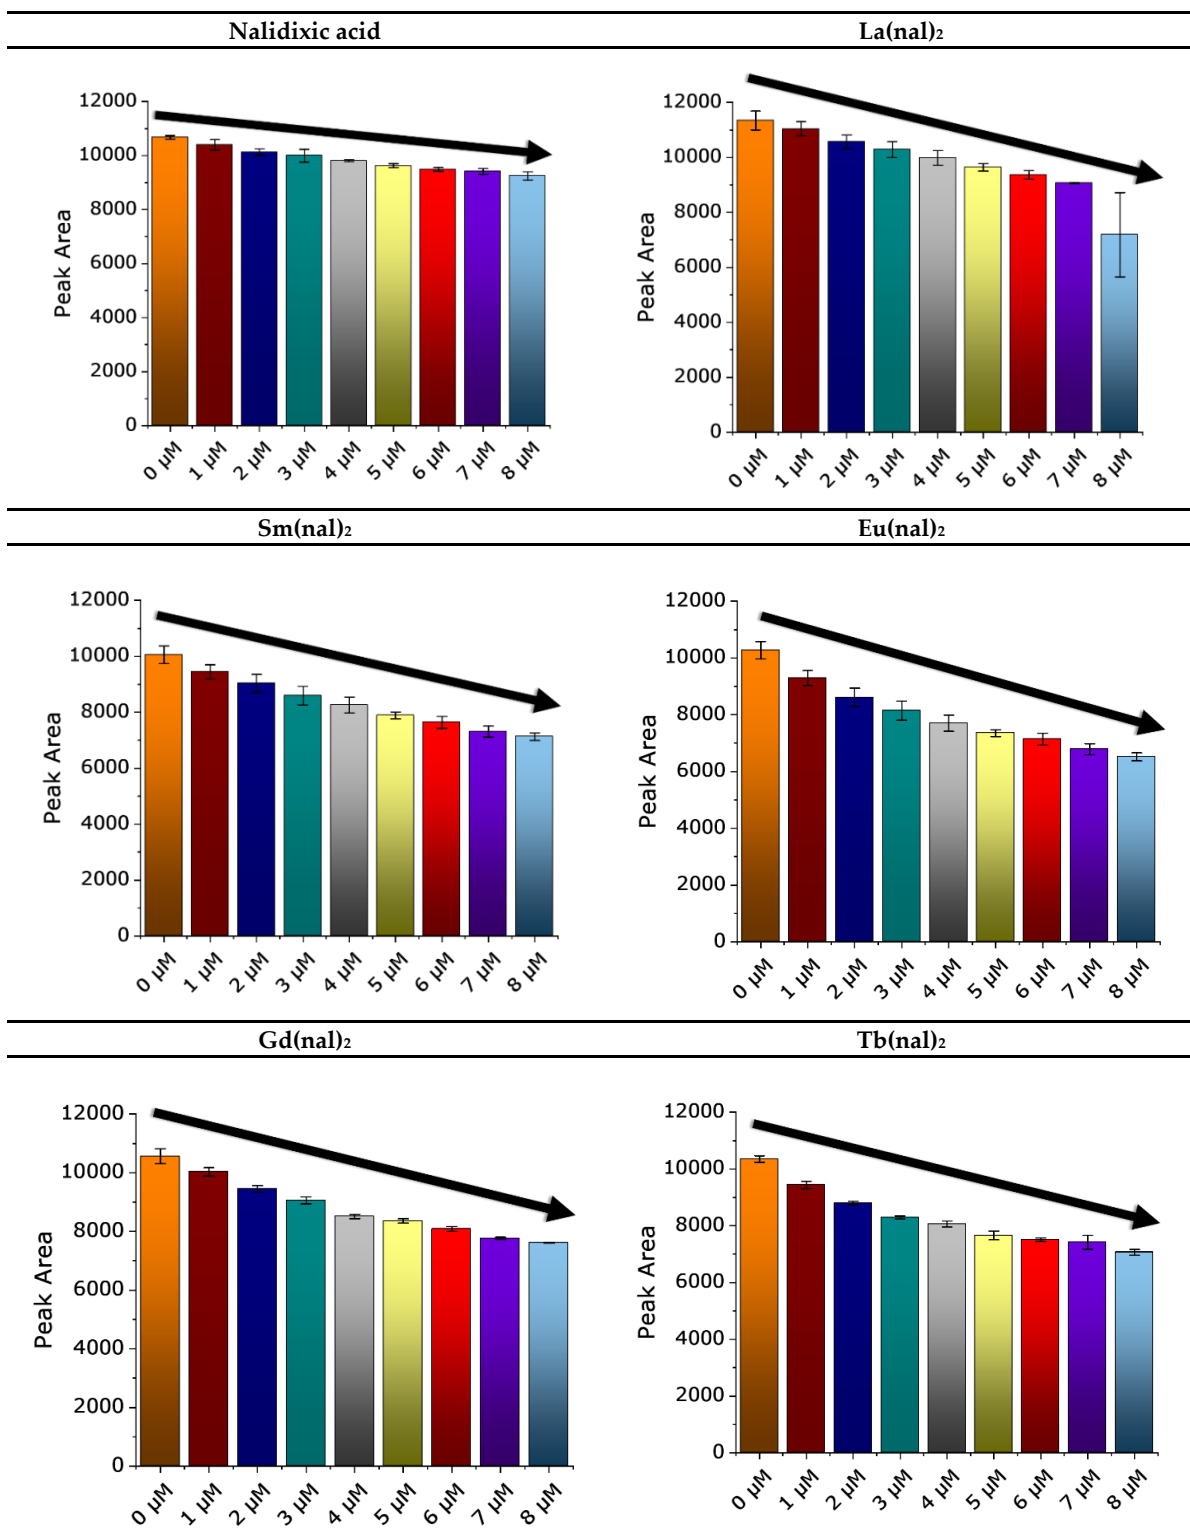

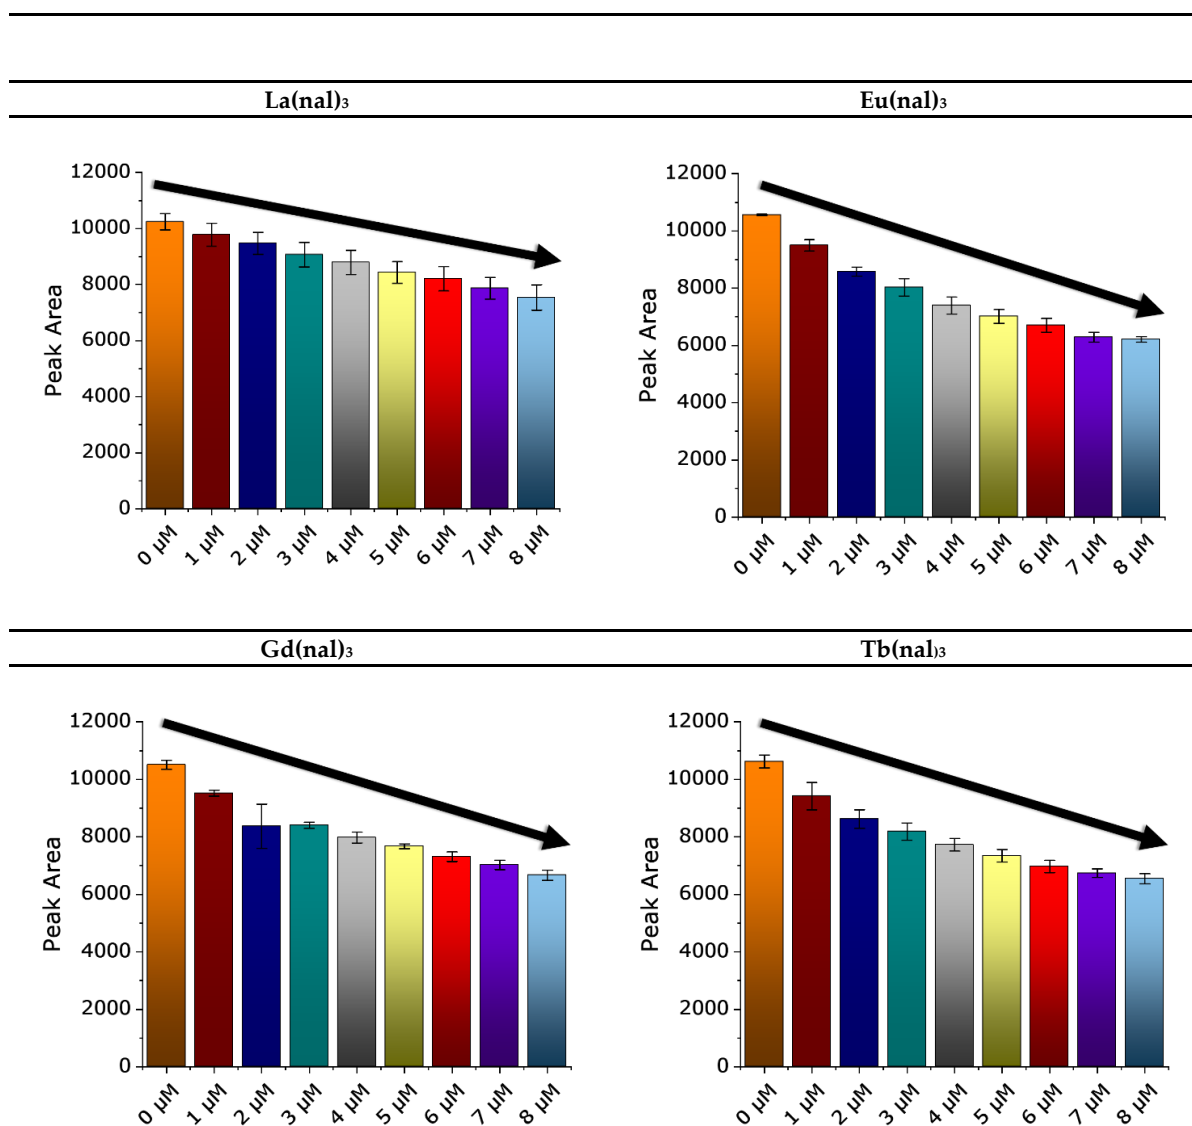

**Figure S19.** Variation of the apo-Tf fluorescence peak area upon adding increasing amounts of the studied compounds. [apo-Tf] = 1 μM, [compound] = 0, 1, 2, 3, 4, 5, 6, 7, 8 μM.



Classical Stern-Volmer

Modified Stern-Volmer

Nalidixic acid

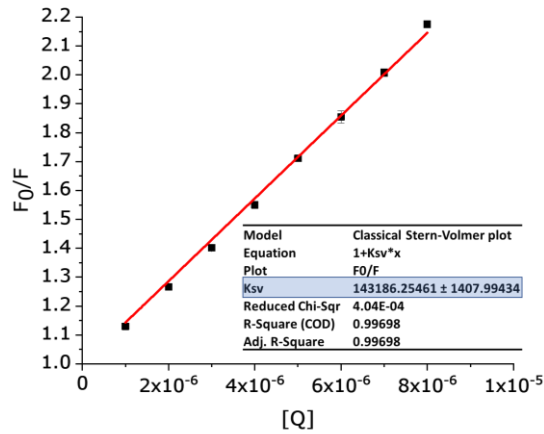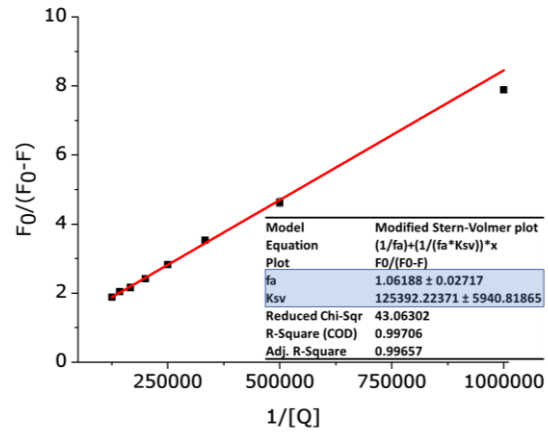

La(nal)<sub>2</sub>

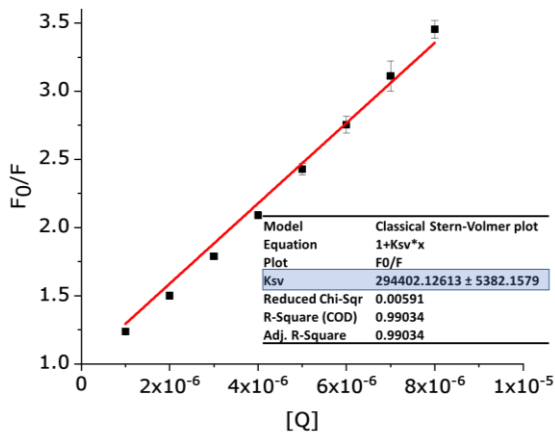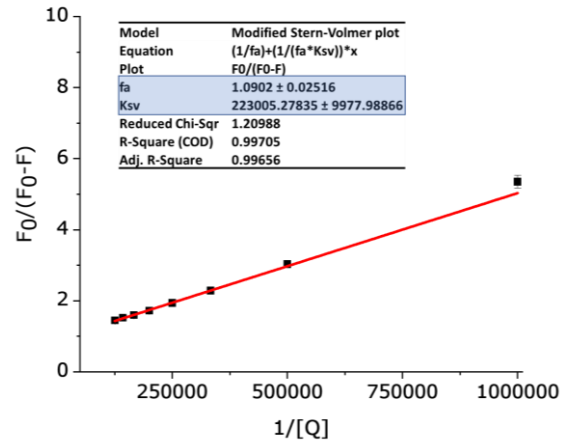

Sm(nal)<sub>2</sub>

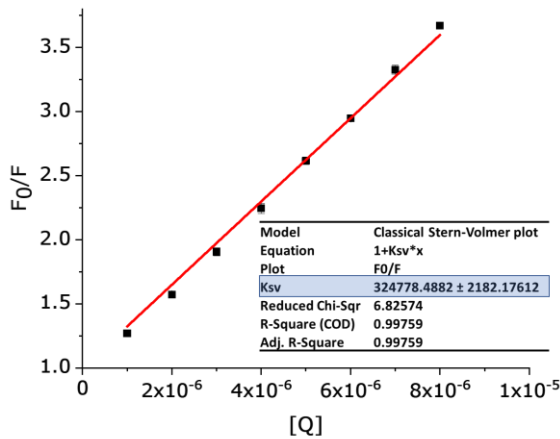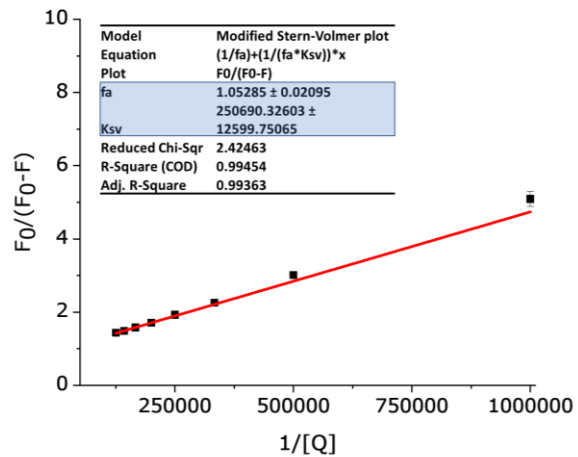

Classical Stern-Volmer

Modified Stern-Volmer

Eu(nal)<sub>2</sub>

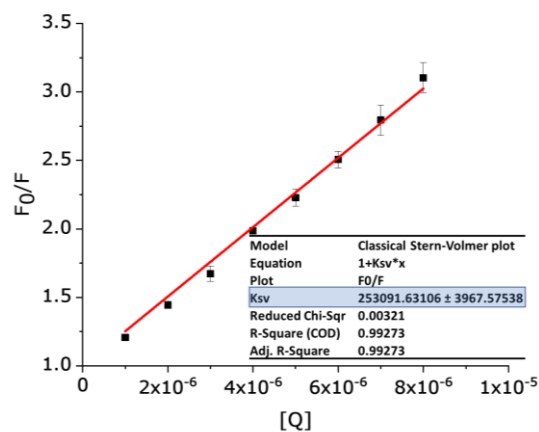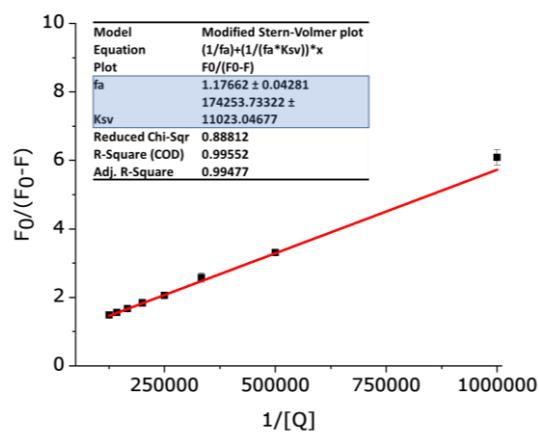

Gd(nal)<sub>2</sub>

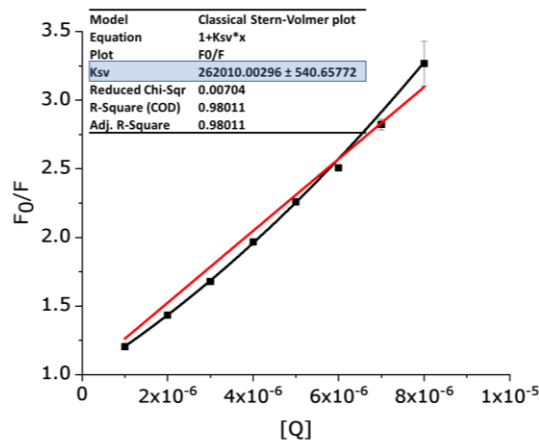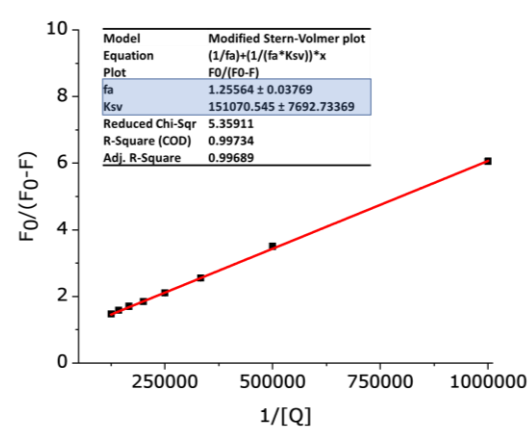

Tb(nal)<sub>2</sub>

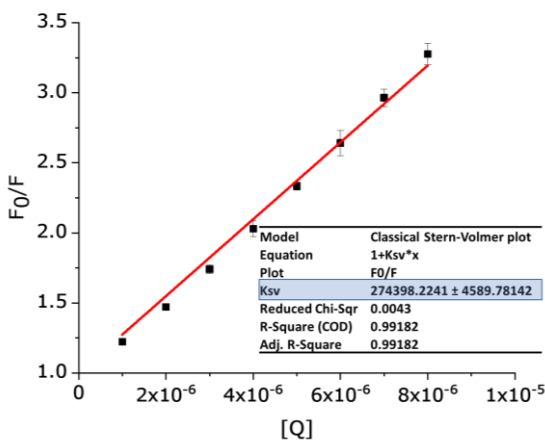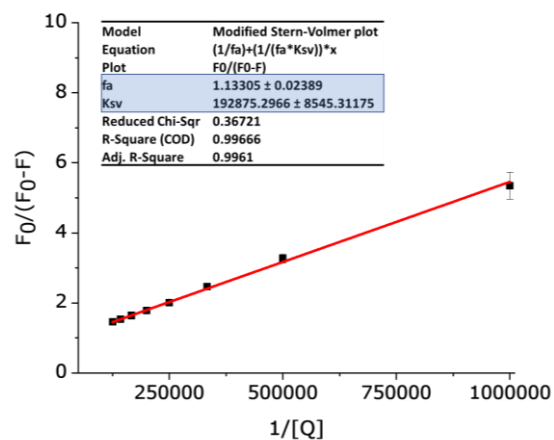

Classical Stern-Volmer

Modified Stern-Volmer

 $\text{La(nal)}_3$ 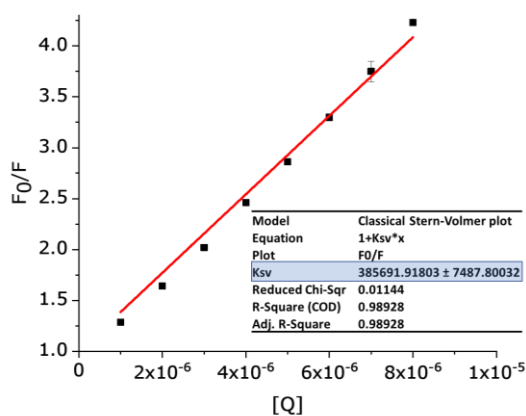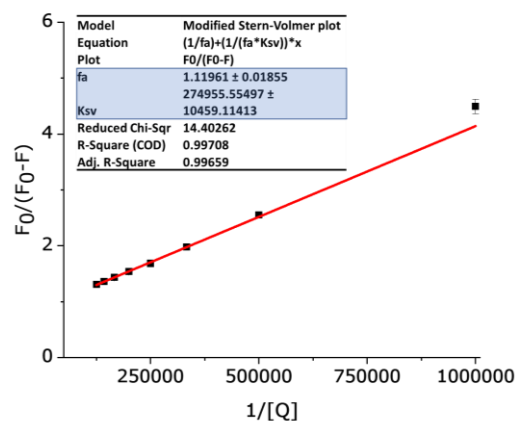 $\text{Eu(nal)}_3$ 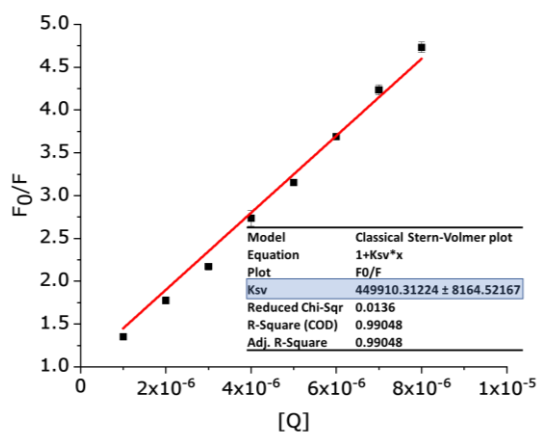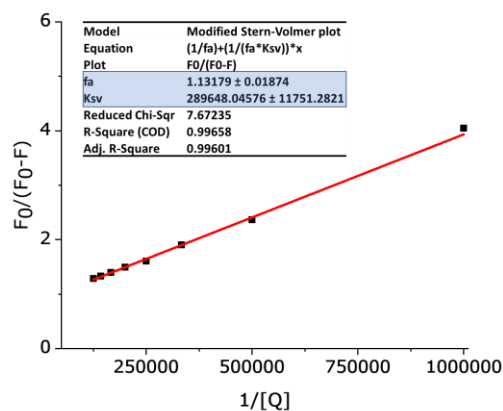 $\text{Gd(nal)}_3$ 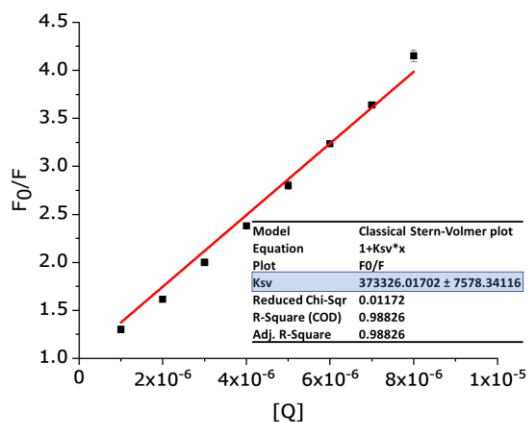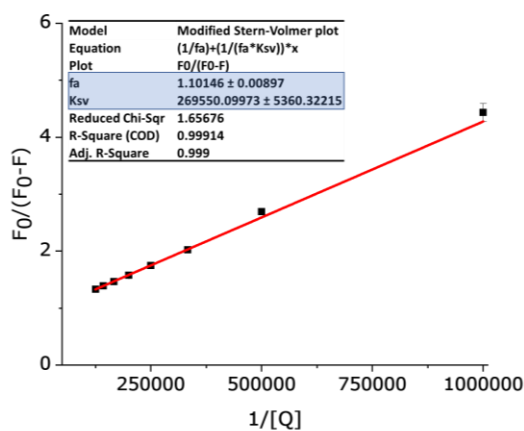

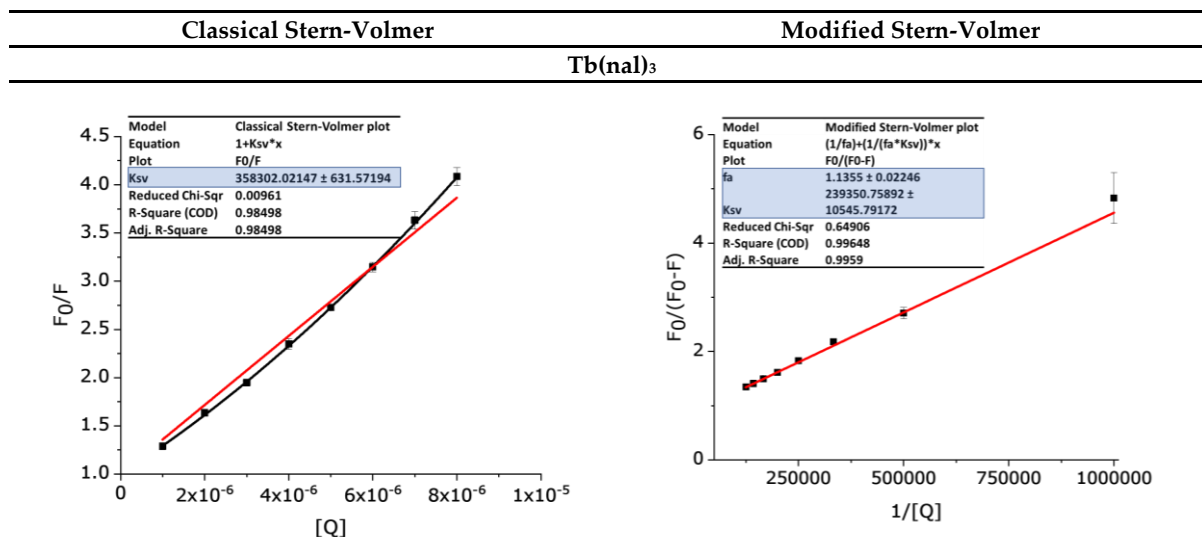

**Figure S20.** Classical (left) and modified (right) Stern-Volmer plots for each of the HSA interaction studies.

# Classical Stern-Volmer

# Modified Stern-Volmer

## Nalidixic acid

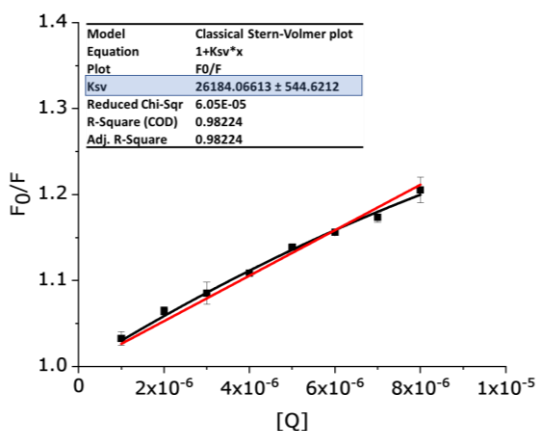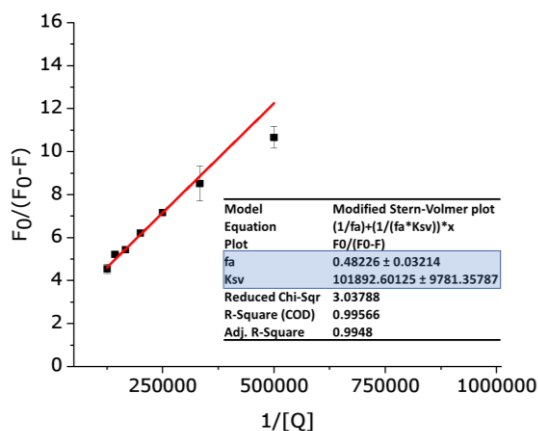

## La(nal)<sub>2</sub>

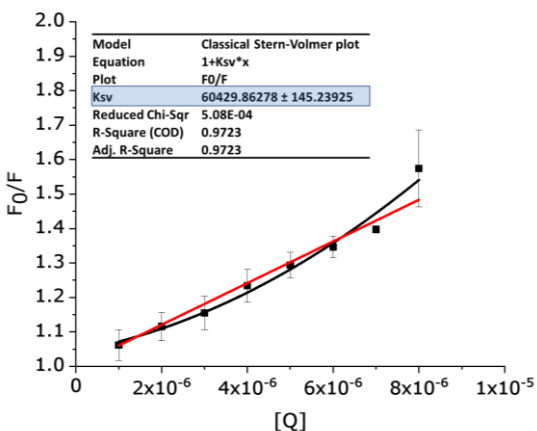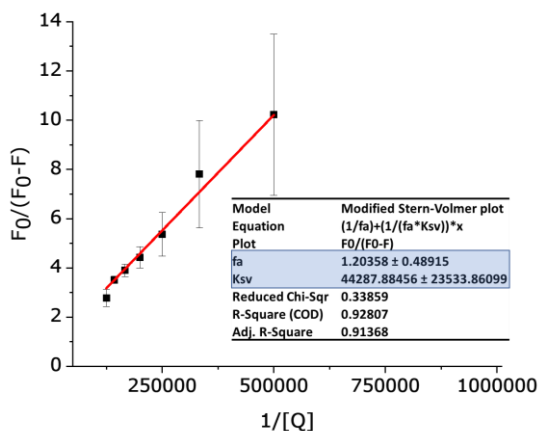

## Sm(nal)<sub>2</sub>

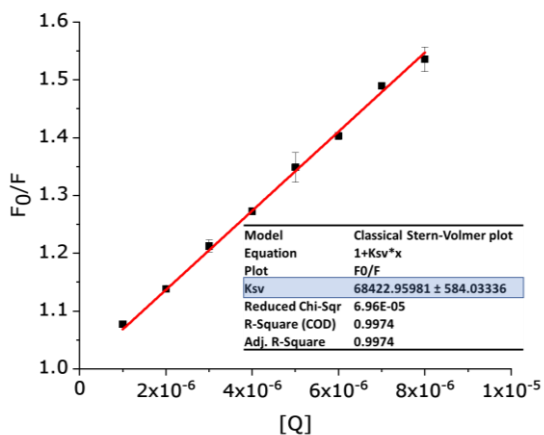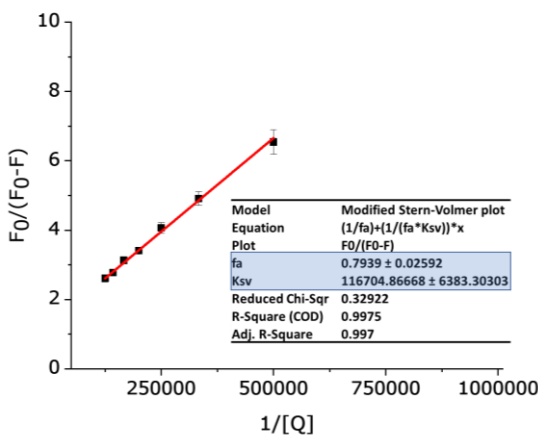

Classical Stern-Volmer

Modified Stern-Volmer

 $\text{Eu}(\text{nal})_2$ 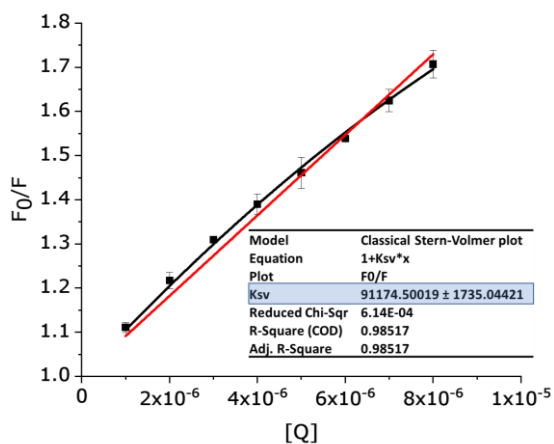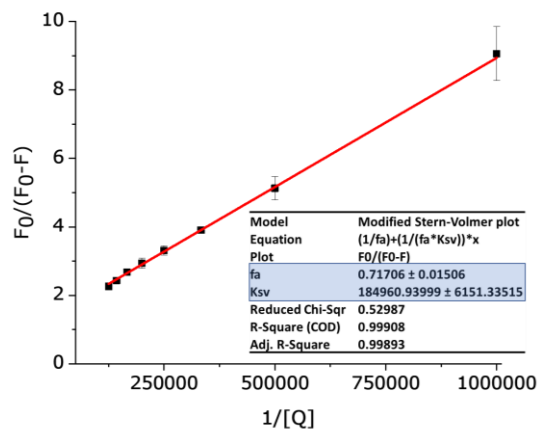 $\text{Gd}(\text{nal})_2$ 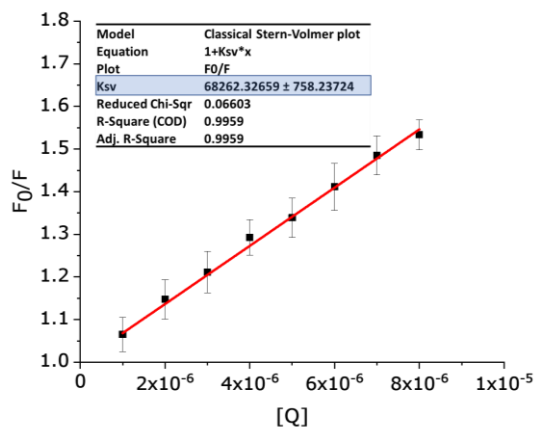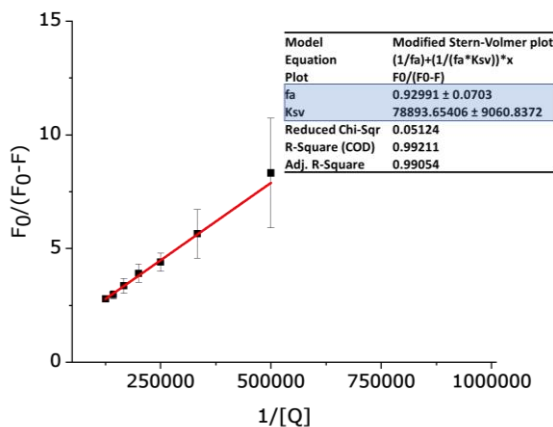 $\text{Tb}(\text{nal})_2$

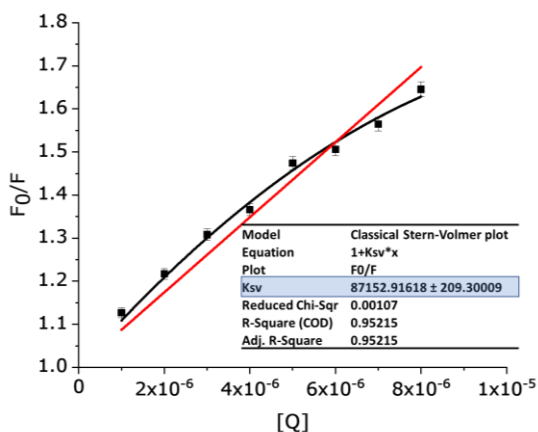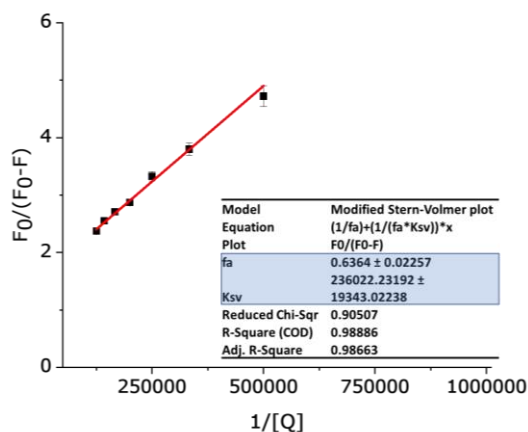

La(nal)<sub>3</sub>

Classical Stern-Volmer

Modified Stern-Volmer

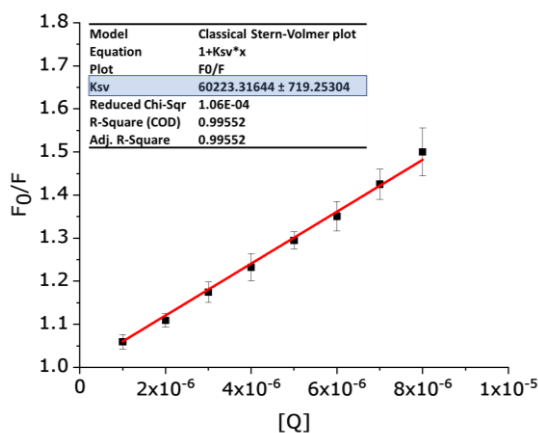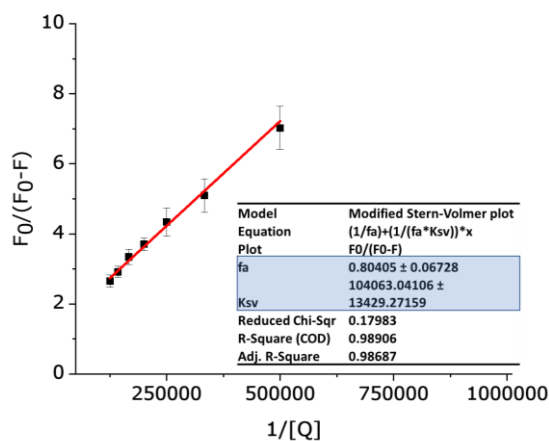

Eu(nal)<sub>3</sub>

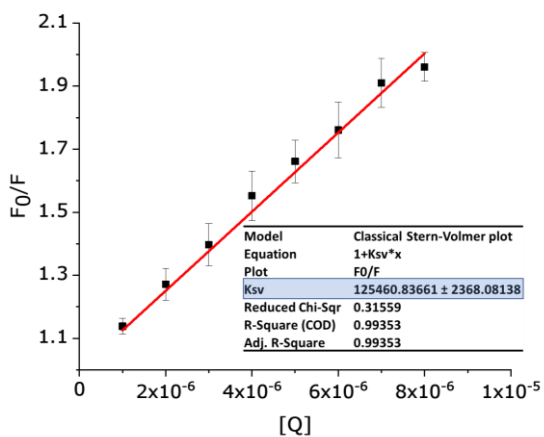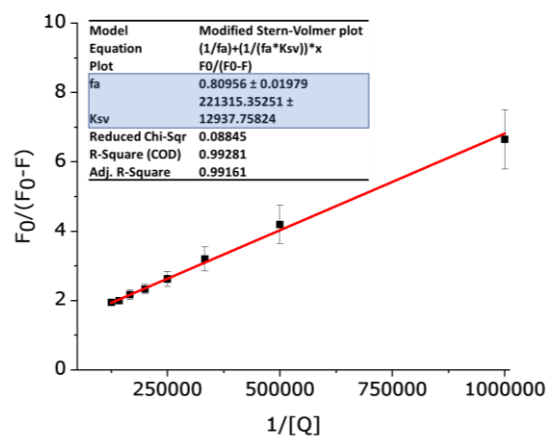

Gd(nal)<sub>3</sub>

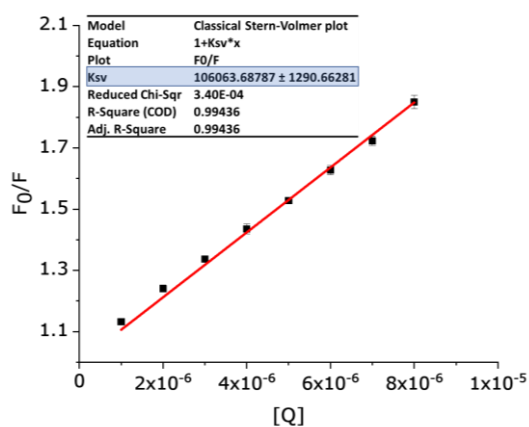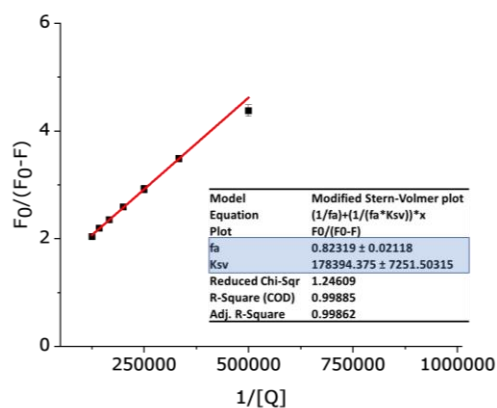

**Tb(nal)<sub>3</sub>**

Classical Stern-Volmer

Modified Stern-Volmer

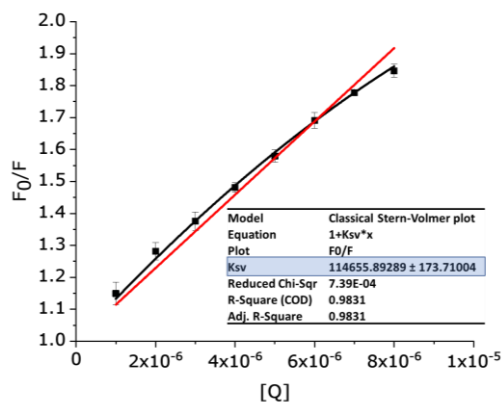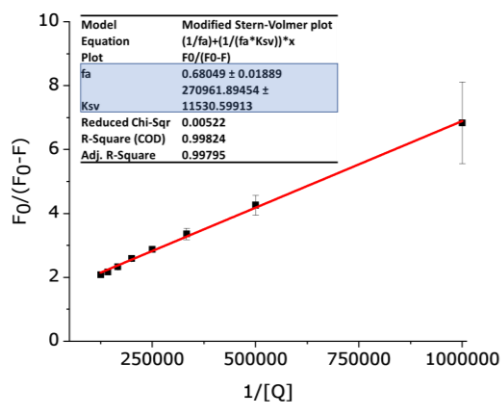

**Figure S21.** Classical (left) and modified (right) Stern-Volmer plots for the apo-Tf interaction assay.



| Nalidixic acid |    |
|----------------|----|
| Ka             | Kd |

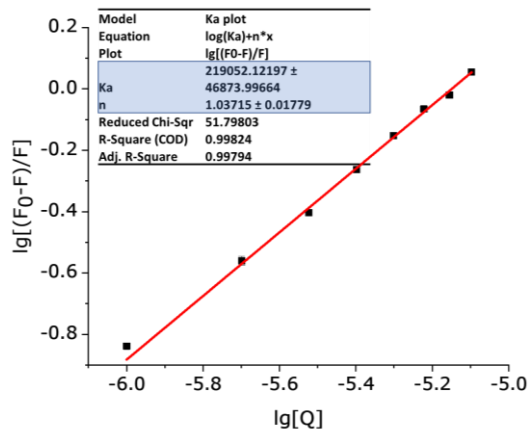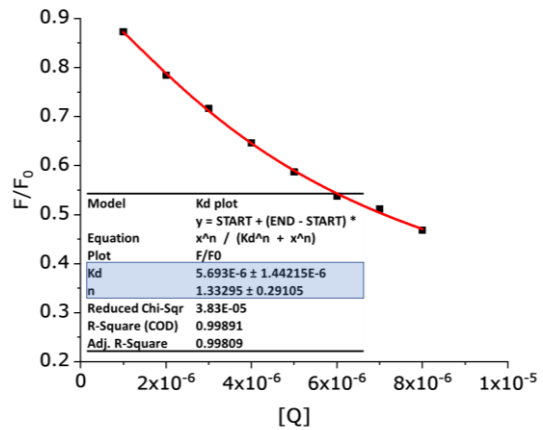

| La(nal) <sub>2</sub> |  |
|----------------------|--|
|----------------------|--|

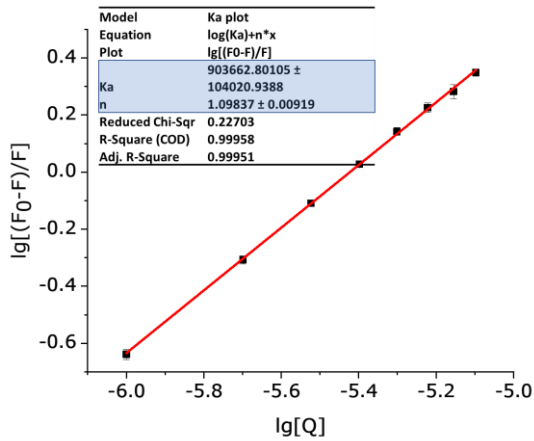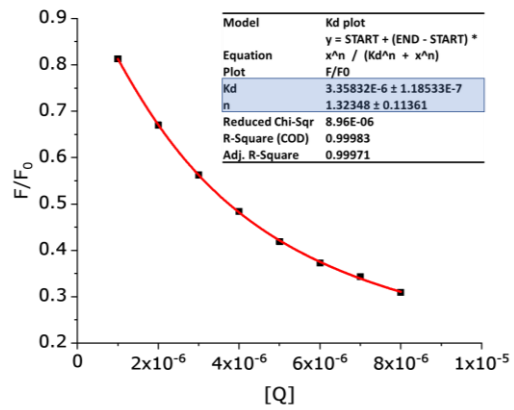

| Sm(nal) <sub>2</sub> |  |
|----------------------|--|
|----------------------|--|

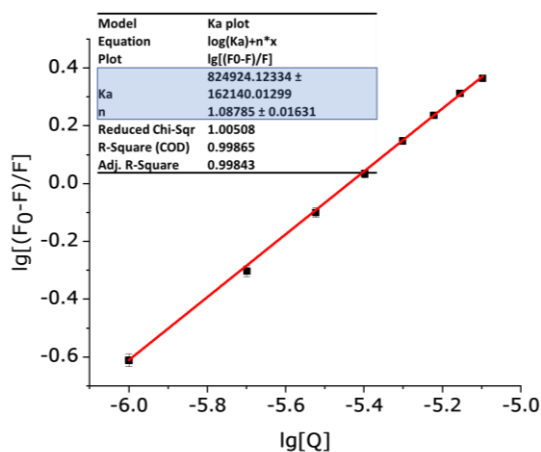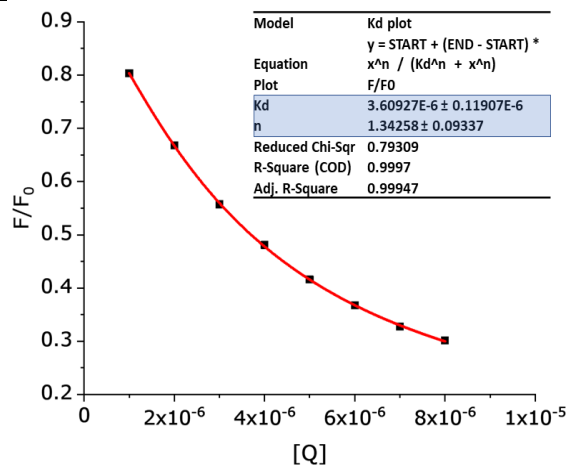

### Eu(nal)<sub>2</sub>

Ka

Kd

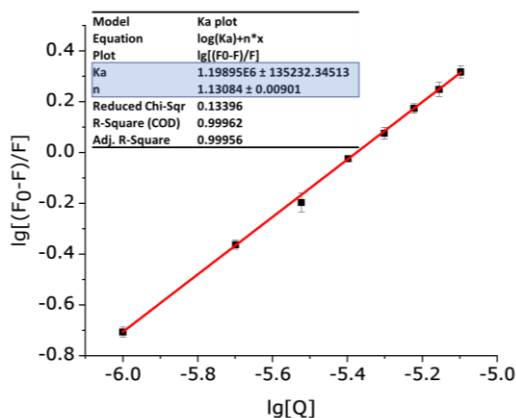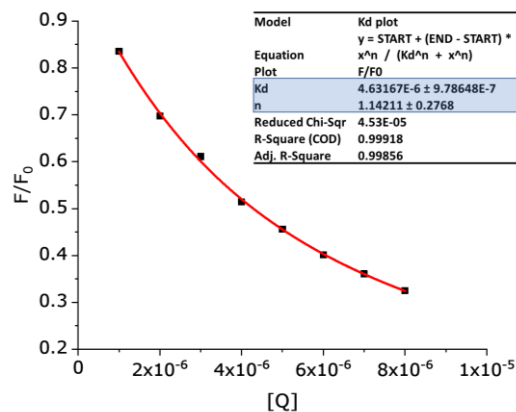

### Gd(nal)<sub>2</sub>

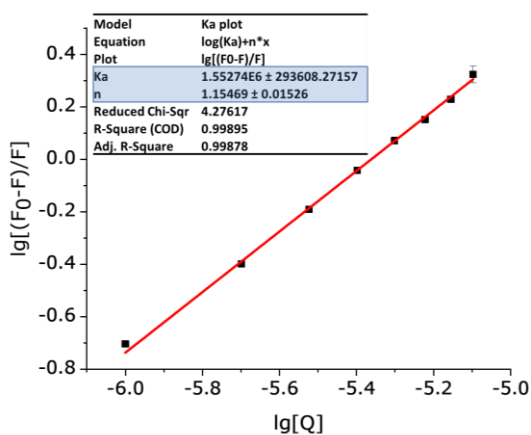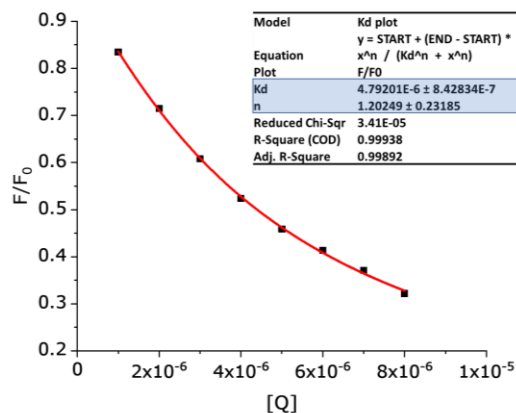

### Tb(nal)<sub>2</sub>

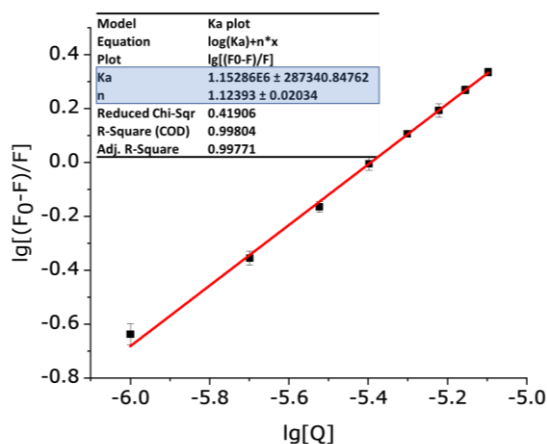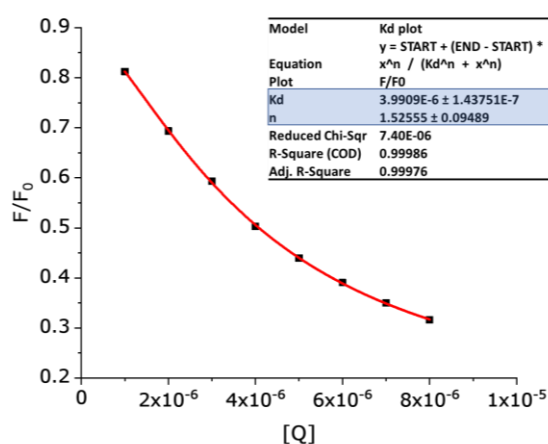

La(nal)<sub>3</sub>

Ka

Kd

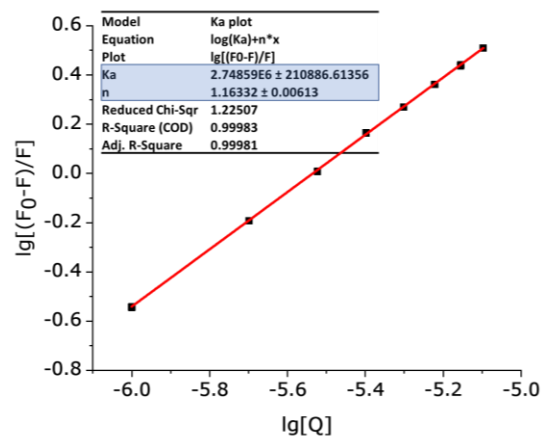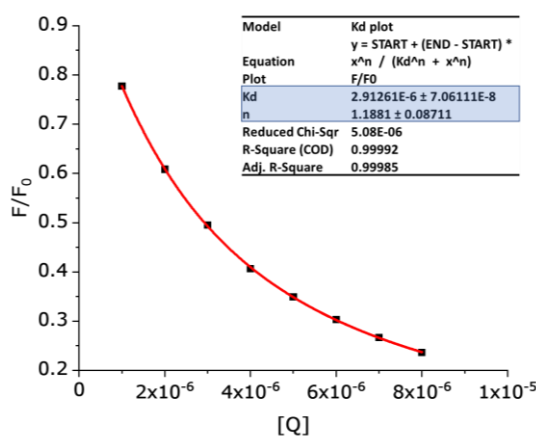

Eu(nal)<sub>3</sub>

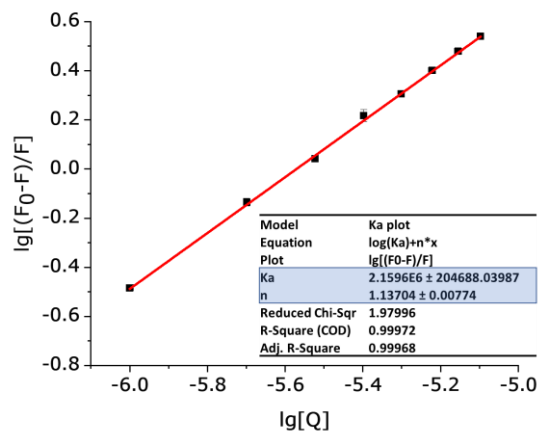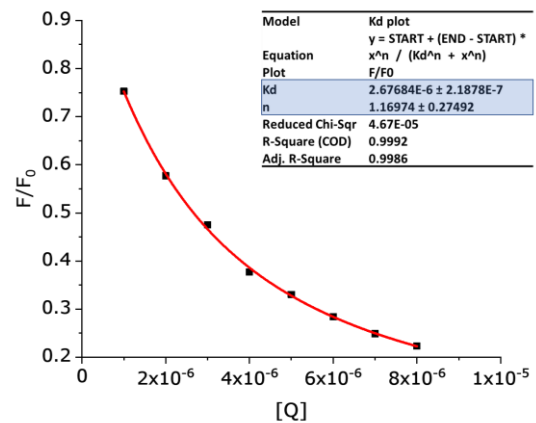

Gd(nal)<sub>3</sub>

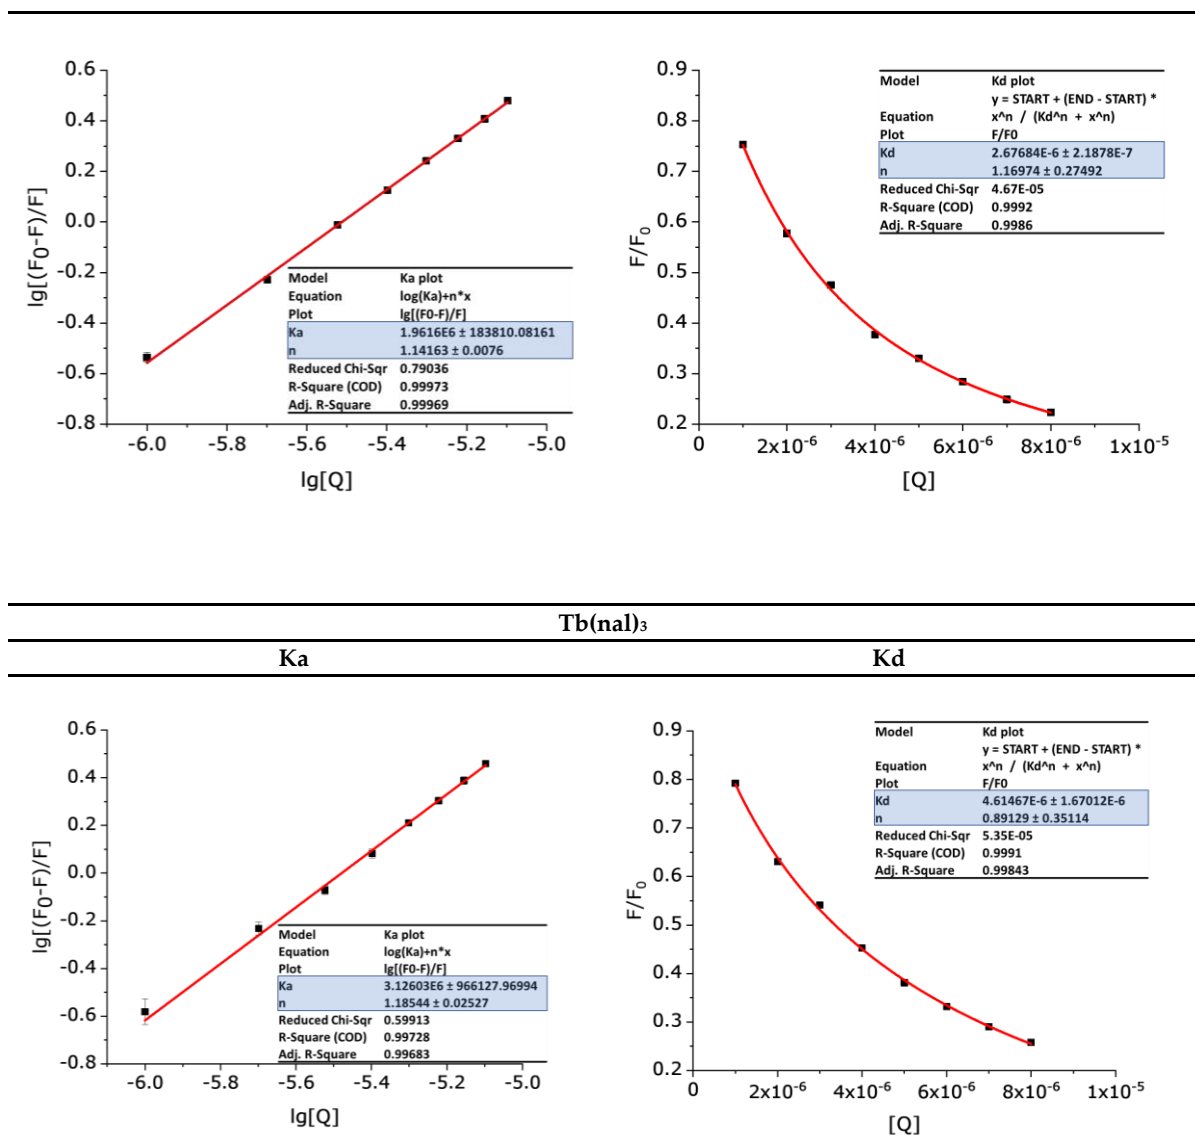

**Figure S22.** Representation of Ka and Kd constants for each of the studied compound-HSA systems..

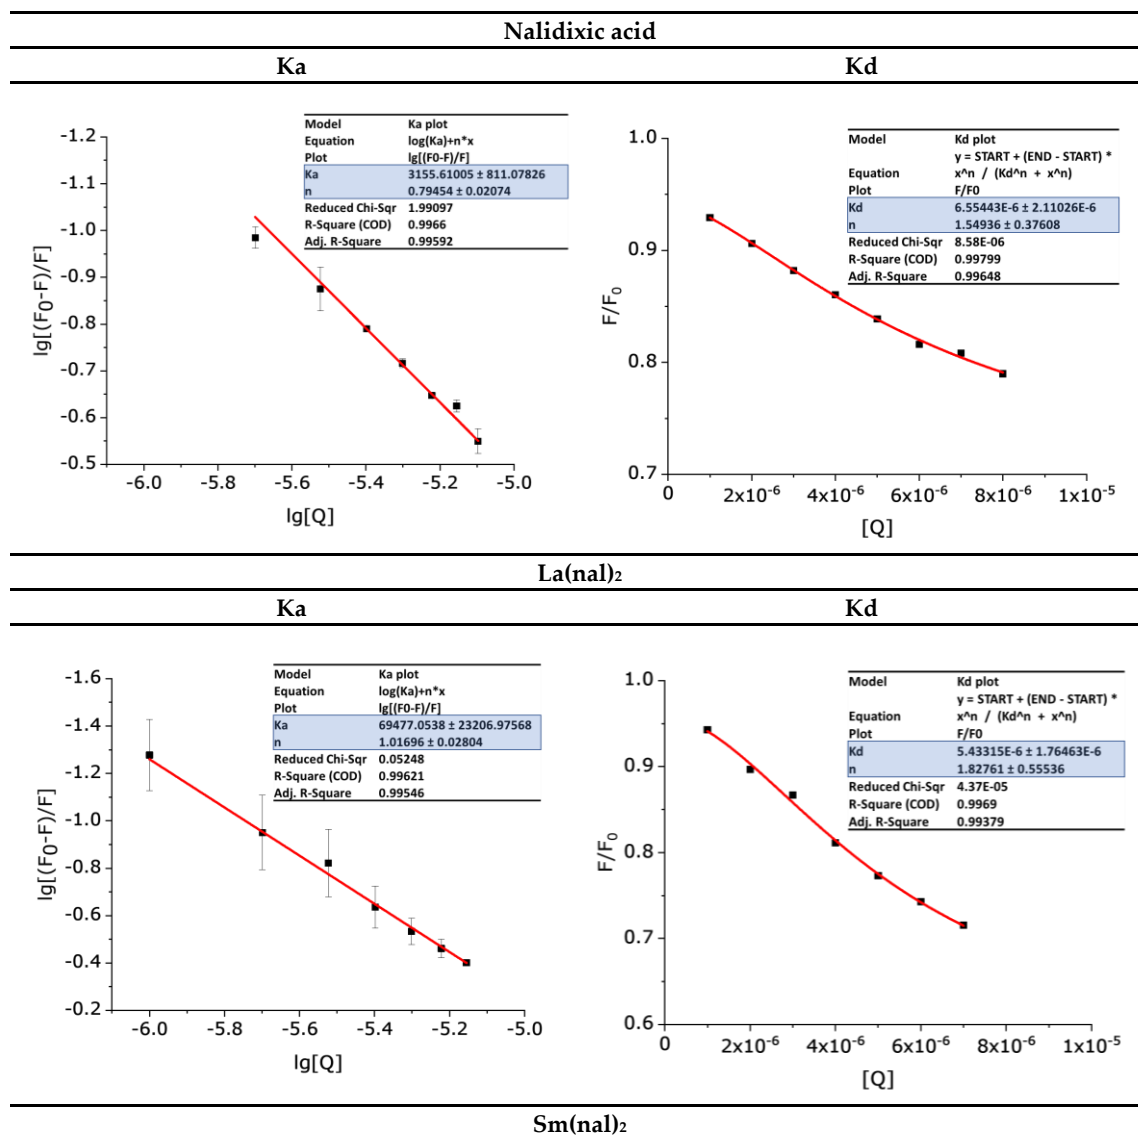

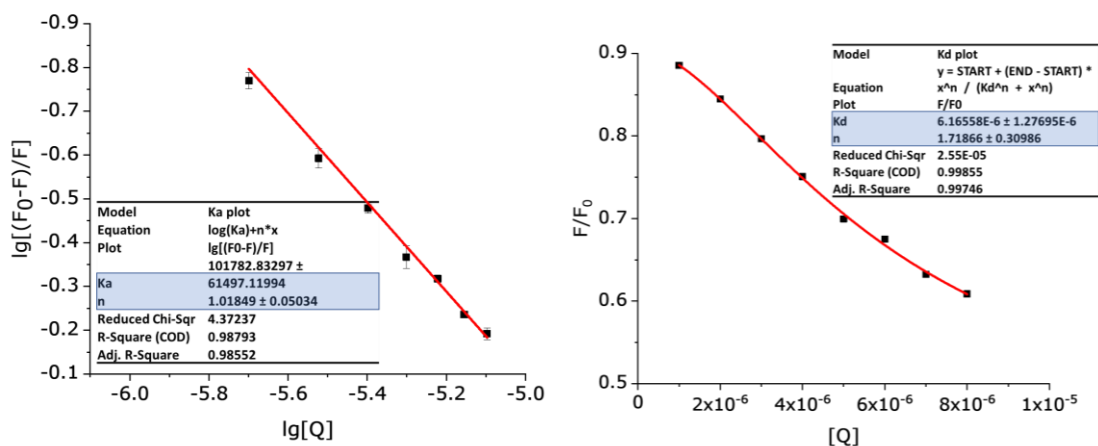

### Eu(nal)<sub>2</sub>

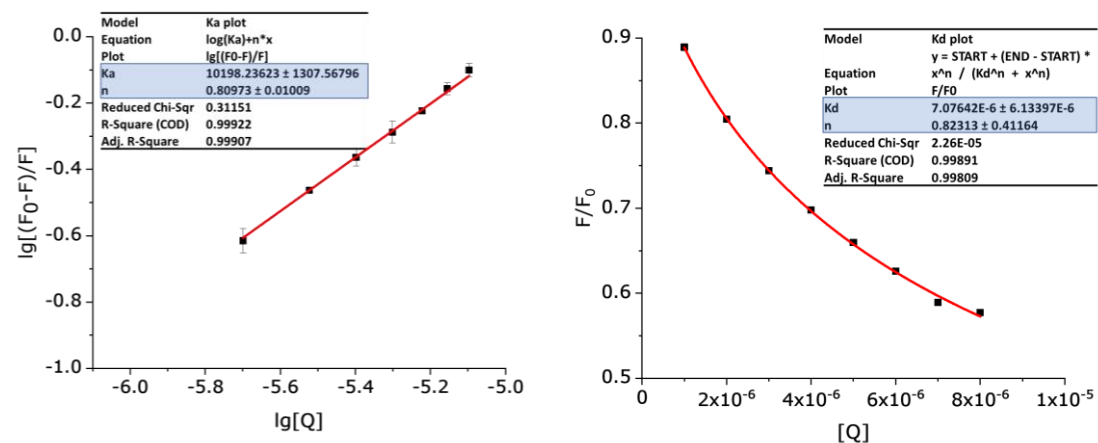

### Gd(nal)<sub>2</sub>

#### Ka

#### Kd

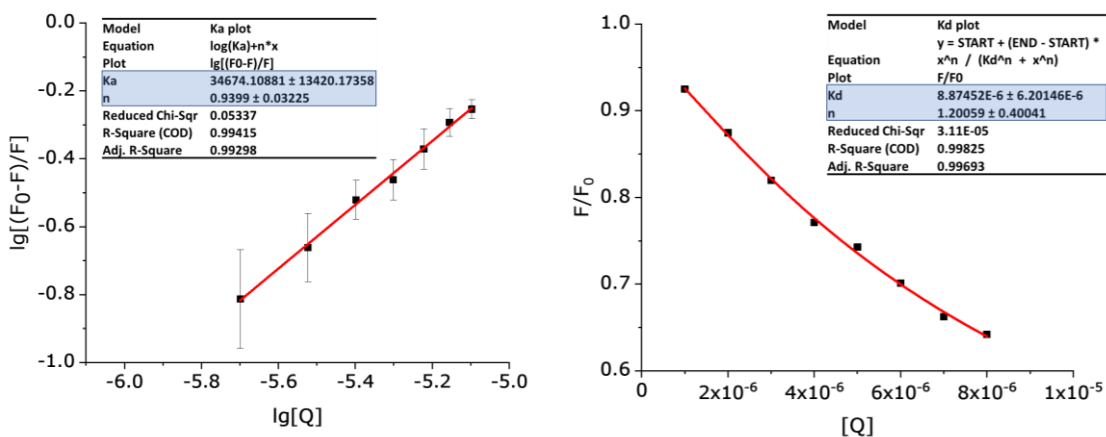

### Tb(nal)<sub>2</sub>

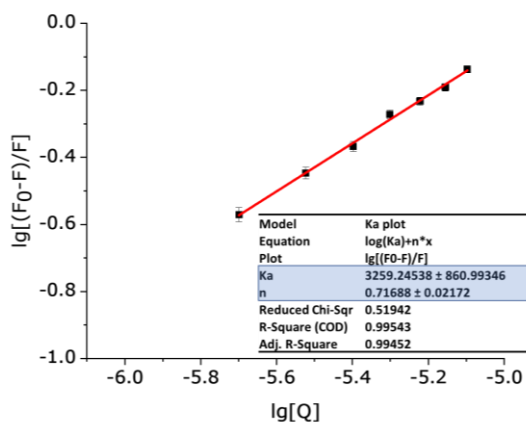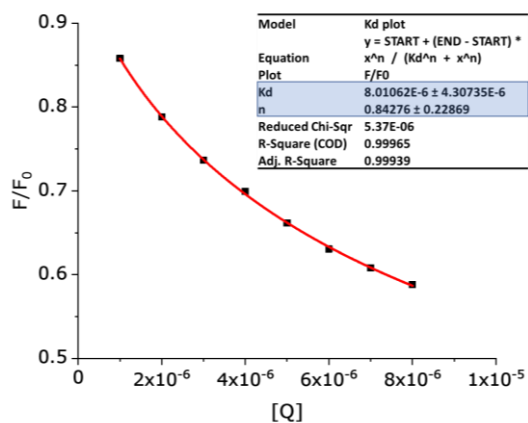

### La(nal)<sub>3</sub>

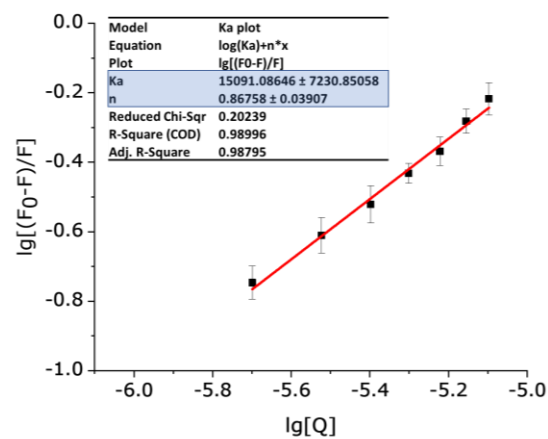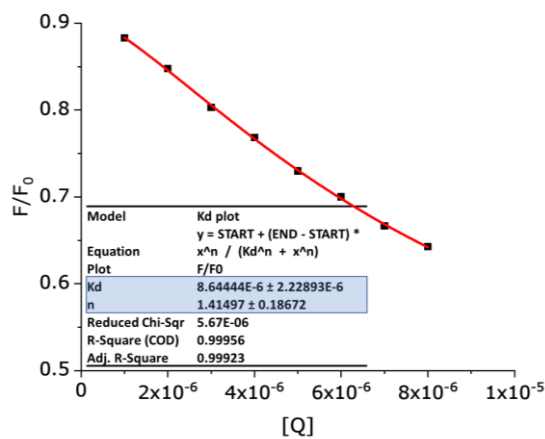

### Eu(nal)<sub>3</sub>

Ka

Kd

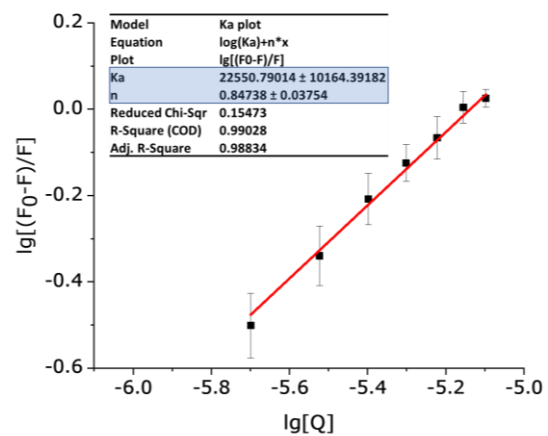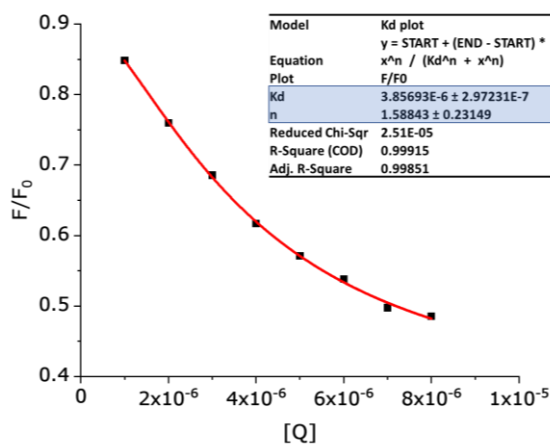

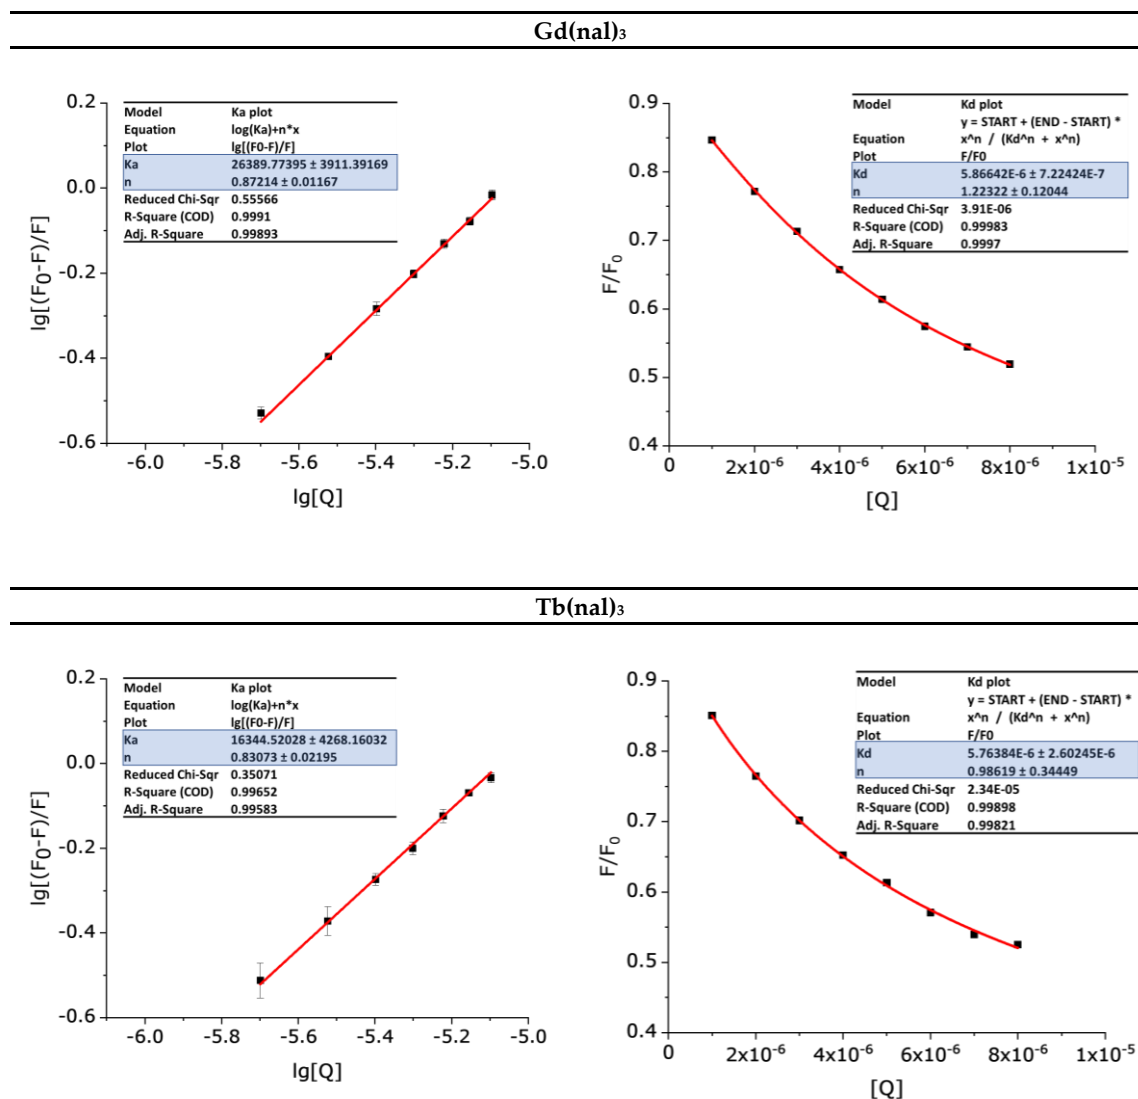

**Figure S23.** Representation of Ka and Kd constants for each of the studied compound-apo-Tf systems.



Nalidixic acid

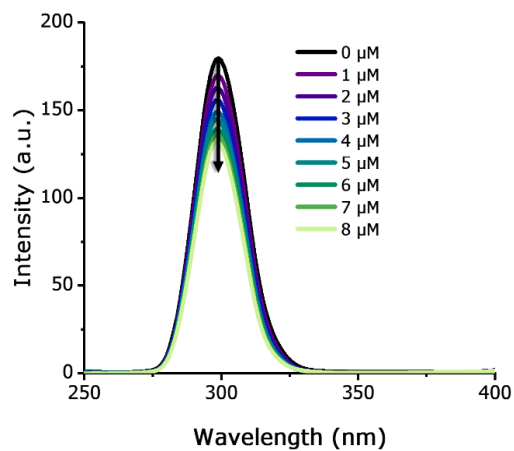 $\text{La}(\text{nal})_2$ 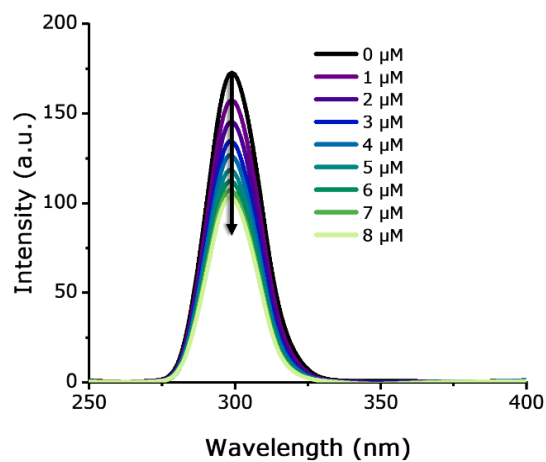 $\text{Sm}(\text{nal})_2$ 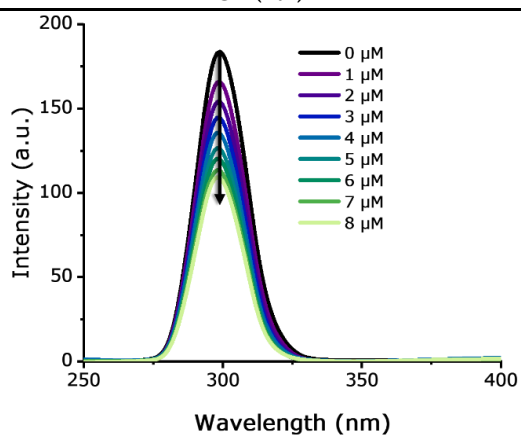 $\text{Eu}(\text{nal})_2$ 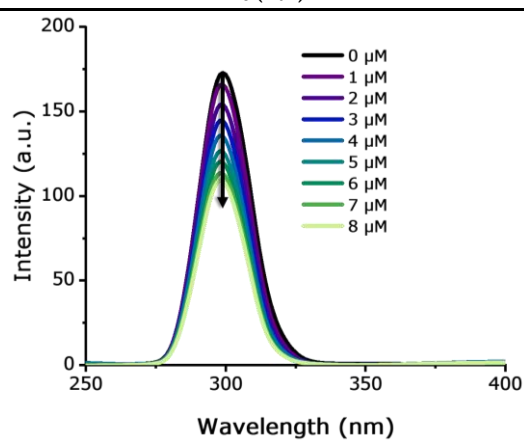 $\text{Gd}(\text{nal})_2$ 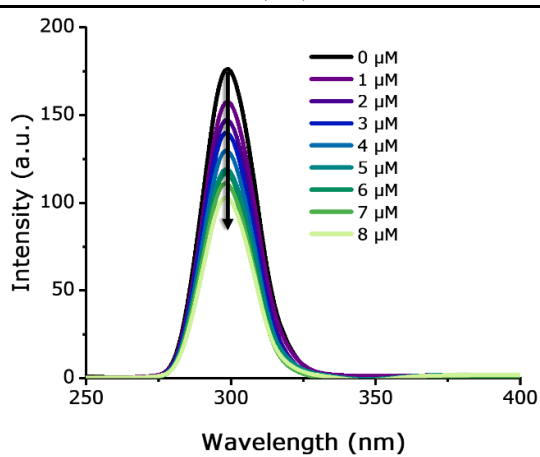 $\text{Tb}(\text{nal})_2$ 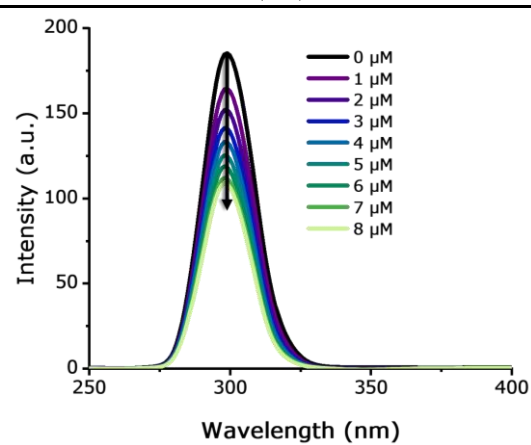

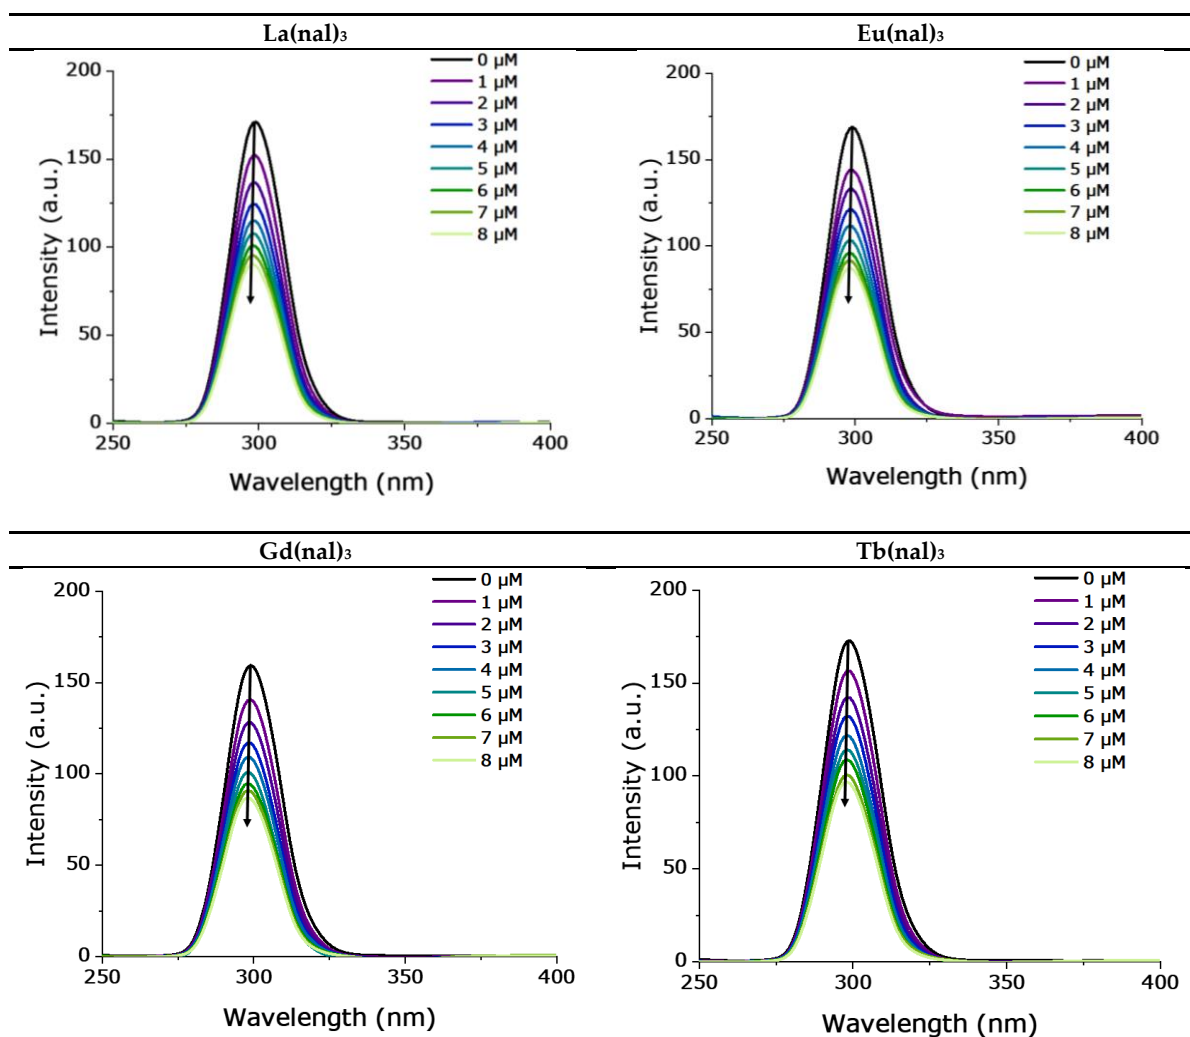

**Figure S24.** Synchronous spectra for the HSA interaction systems recorded at  $\Delta\lambda = 15$  nm.  $[\text{HSA}] = 2.5 \mu\text{M}$ ,  $[\text{compound}] = 0, 1, 2, 3, 4, 5, 6, 7, 8 \mu\text{M}$ .

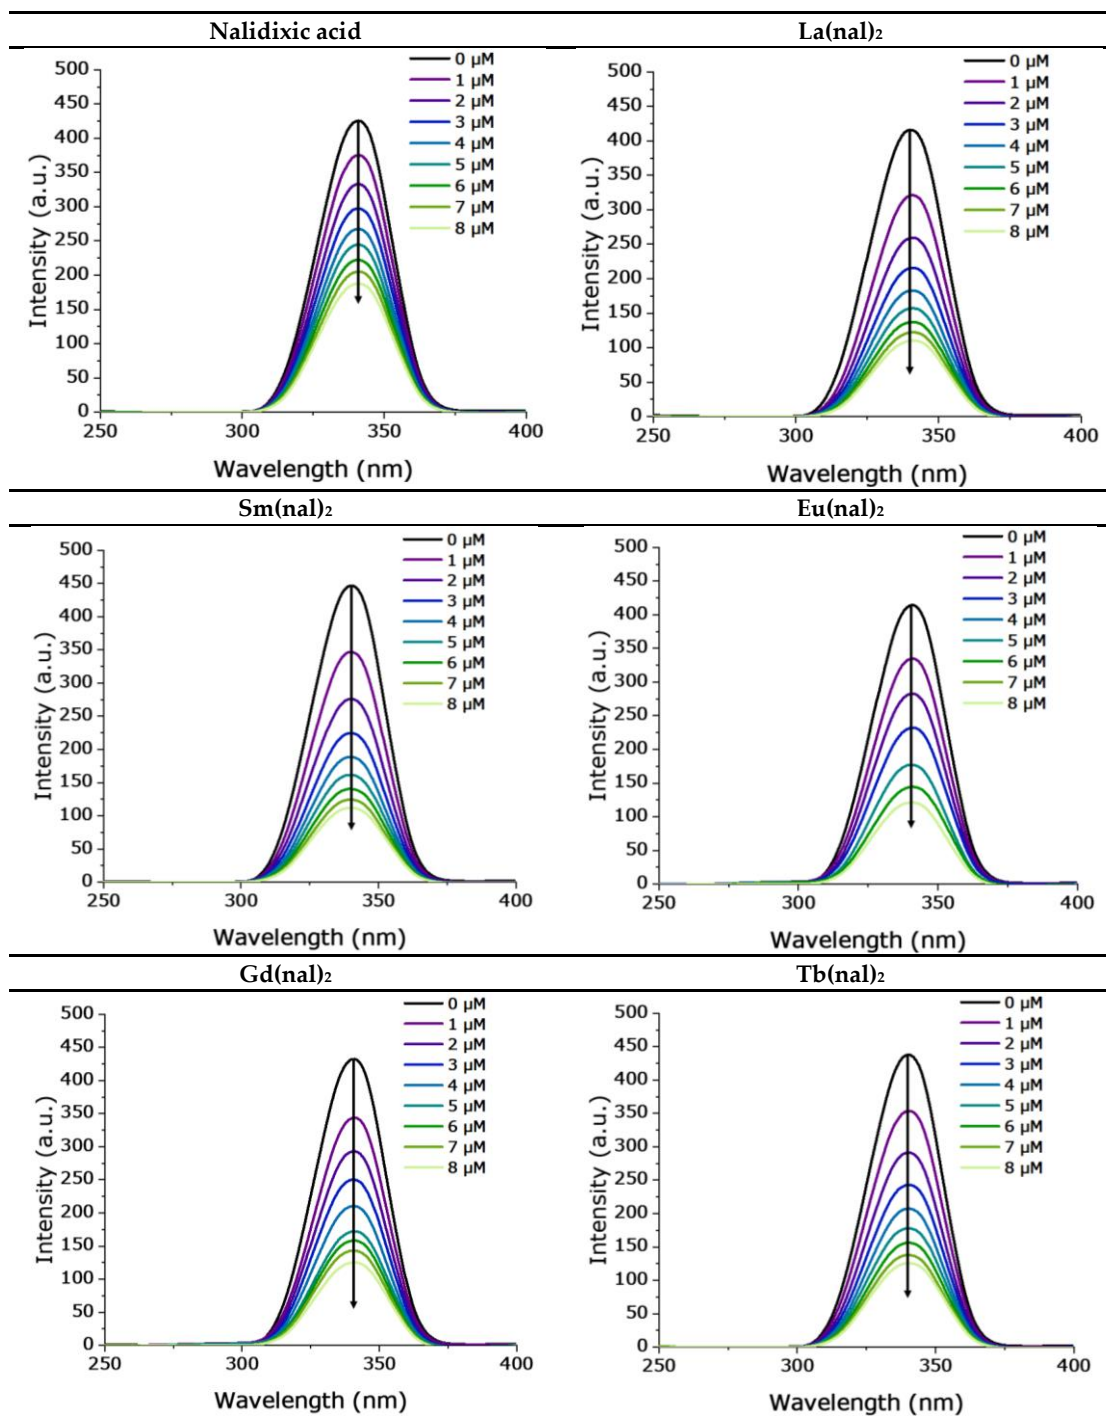

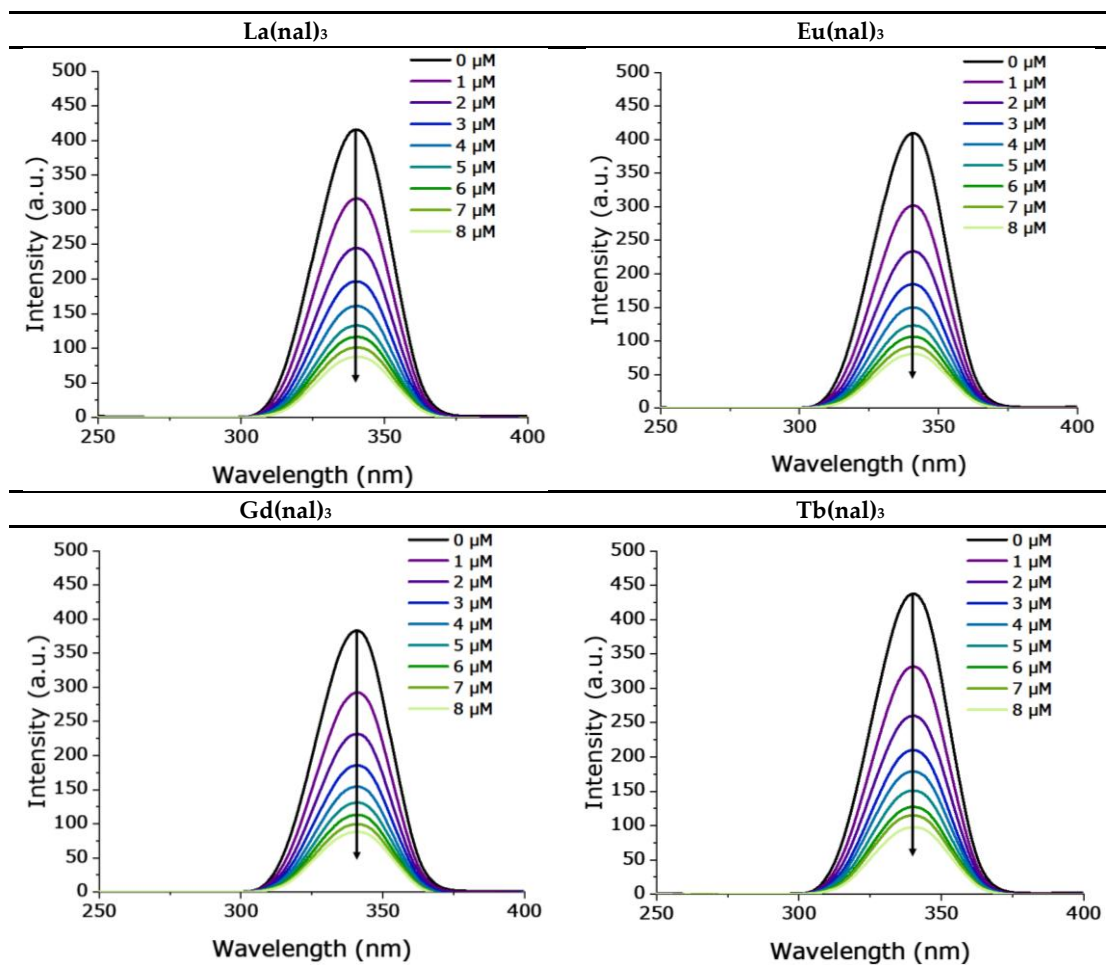

**Figure S25.** Synchronous spectra for the HSA interaction systems recorded at  $\Delta\lambda = 60$  nm.  $[\text{HSA}] = 2.5 \mu\text{M}$ ,  $[\text{compound}] = 0, 1, 2, 3, 4, 5, 6, 7, 8 \mu\text{M}$ .

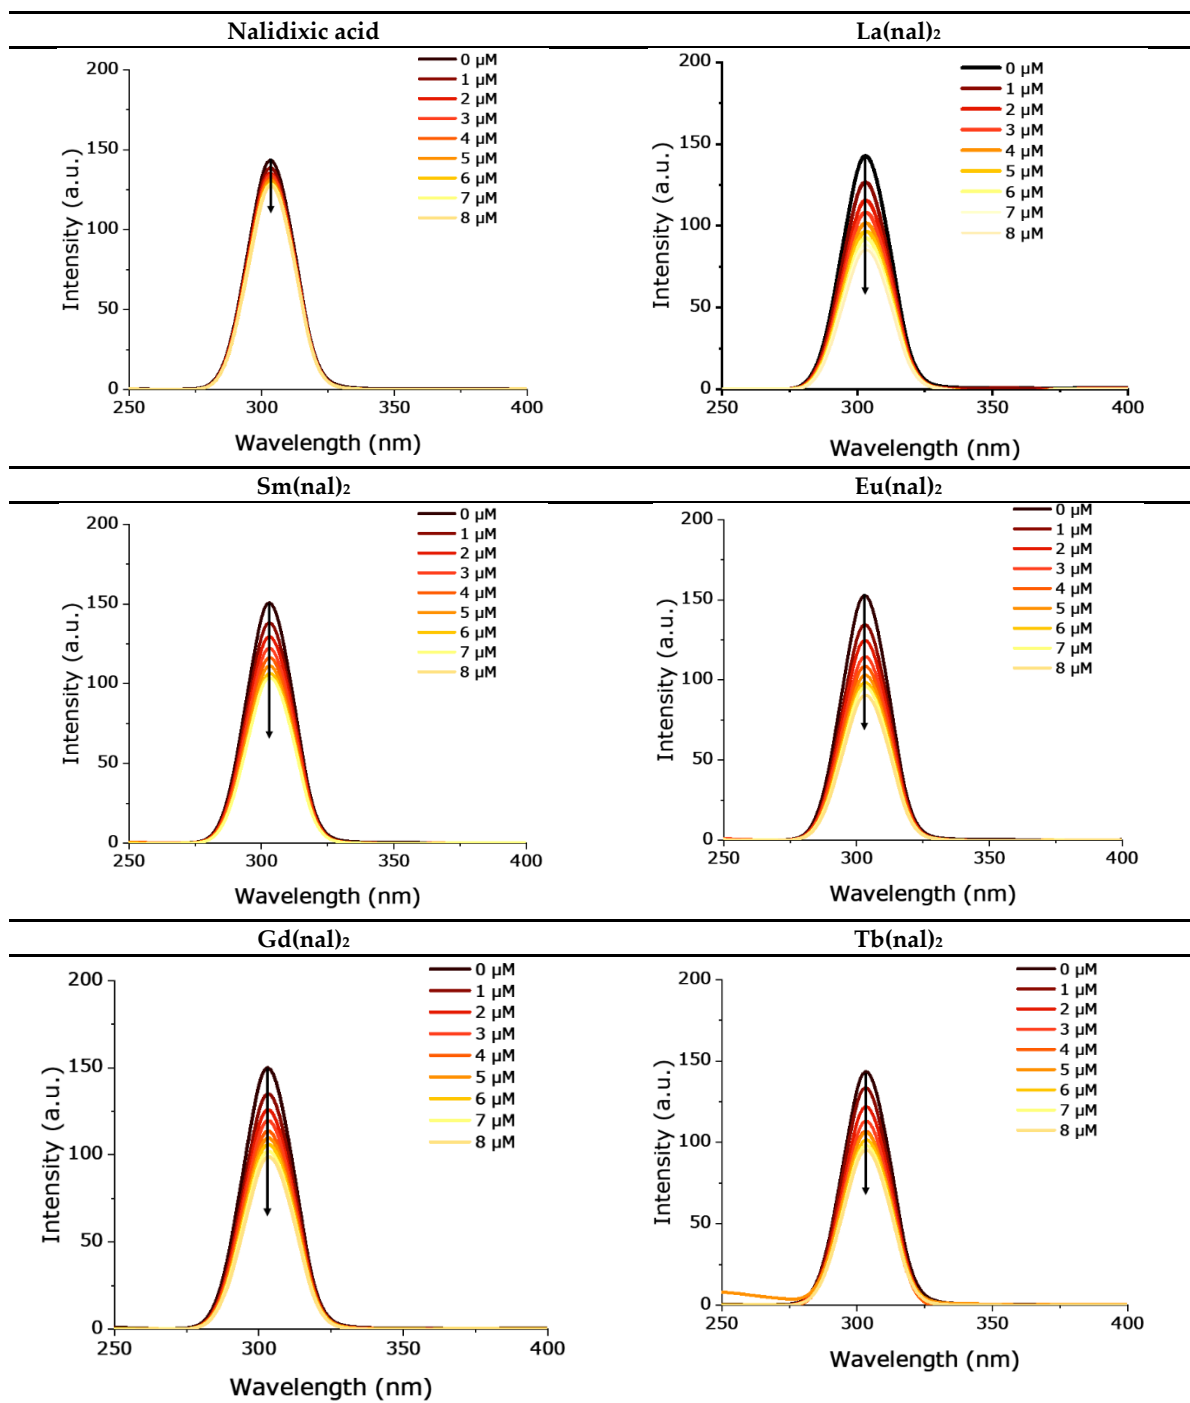

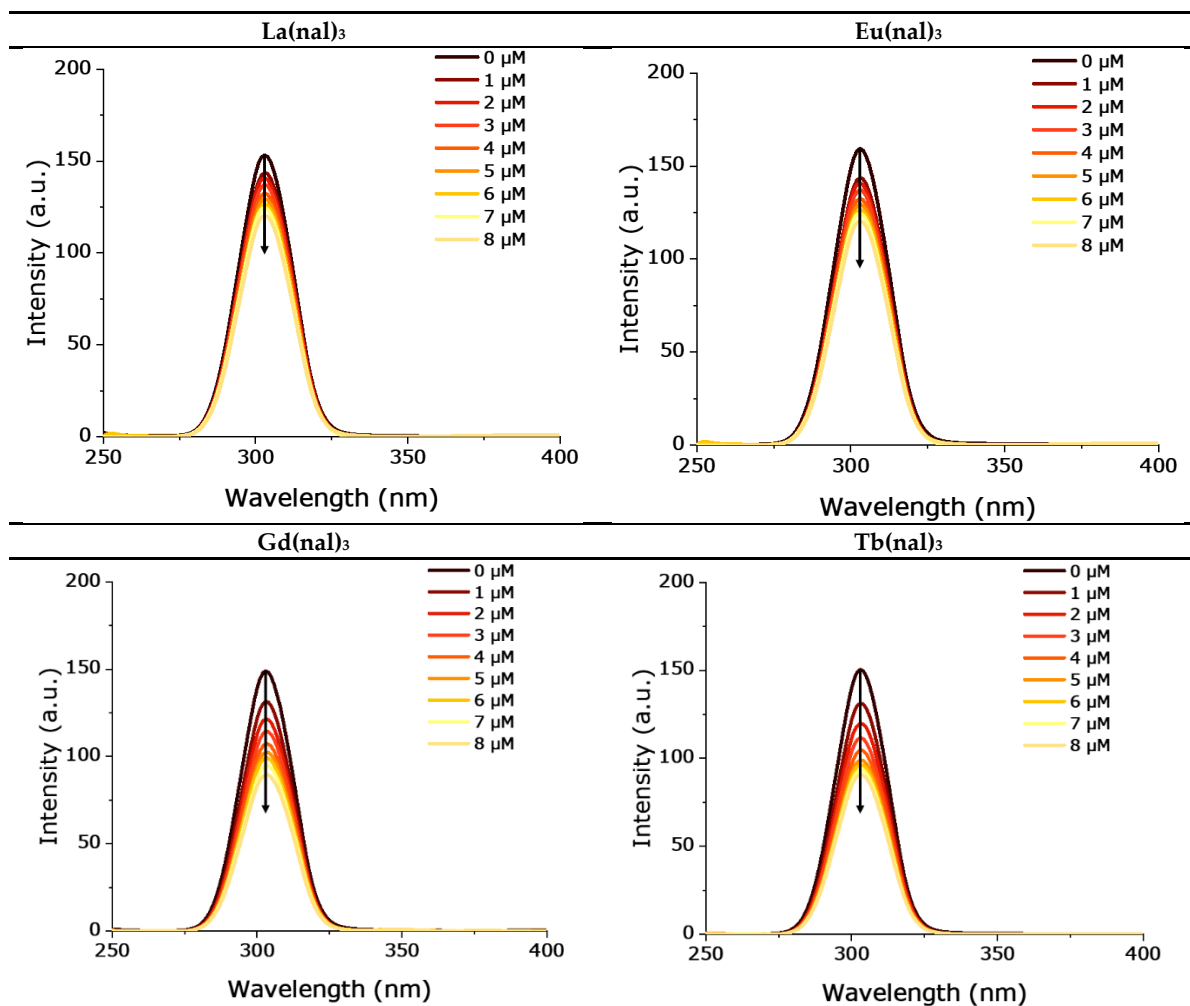

**Figure S26.** Synchronous spectra of the tested compounds - apo-Tf systems recorded at  $\Delta\lambda=15$  nm. [apo-Tf] = 1  $\mu\text{M}$ , [compound] = 0, 1, 2, 3, 4, 5, 6, 7, 8  $\mu\text{M}$ .

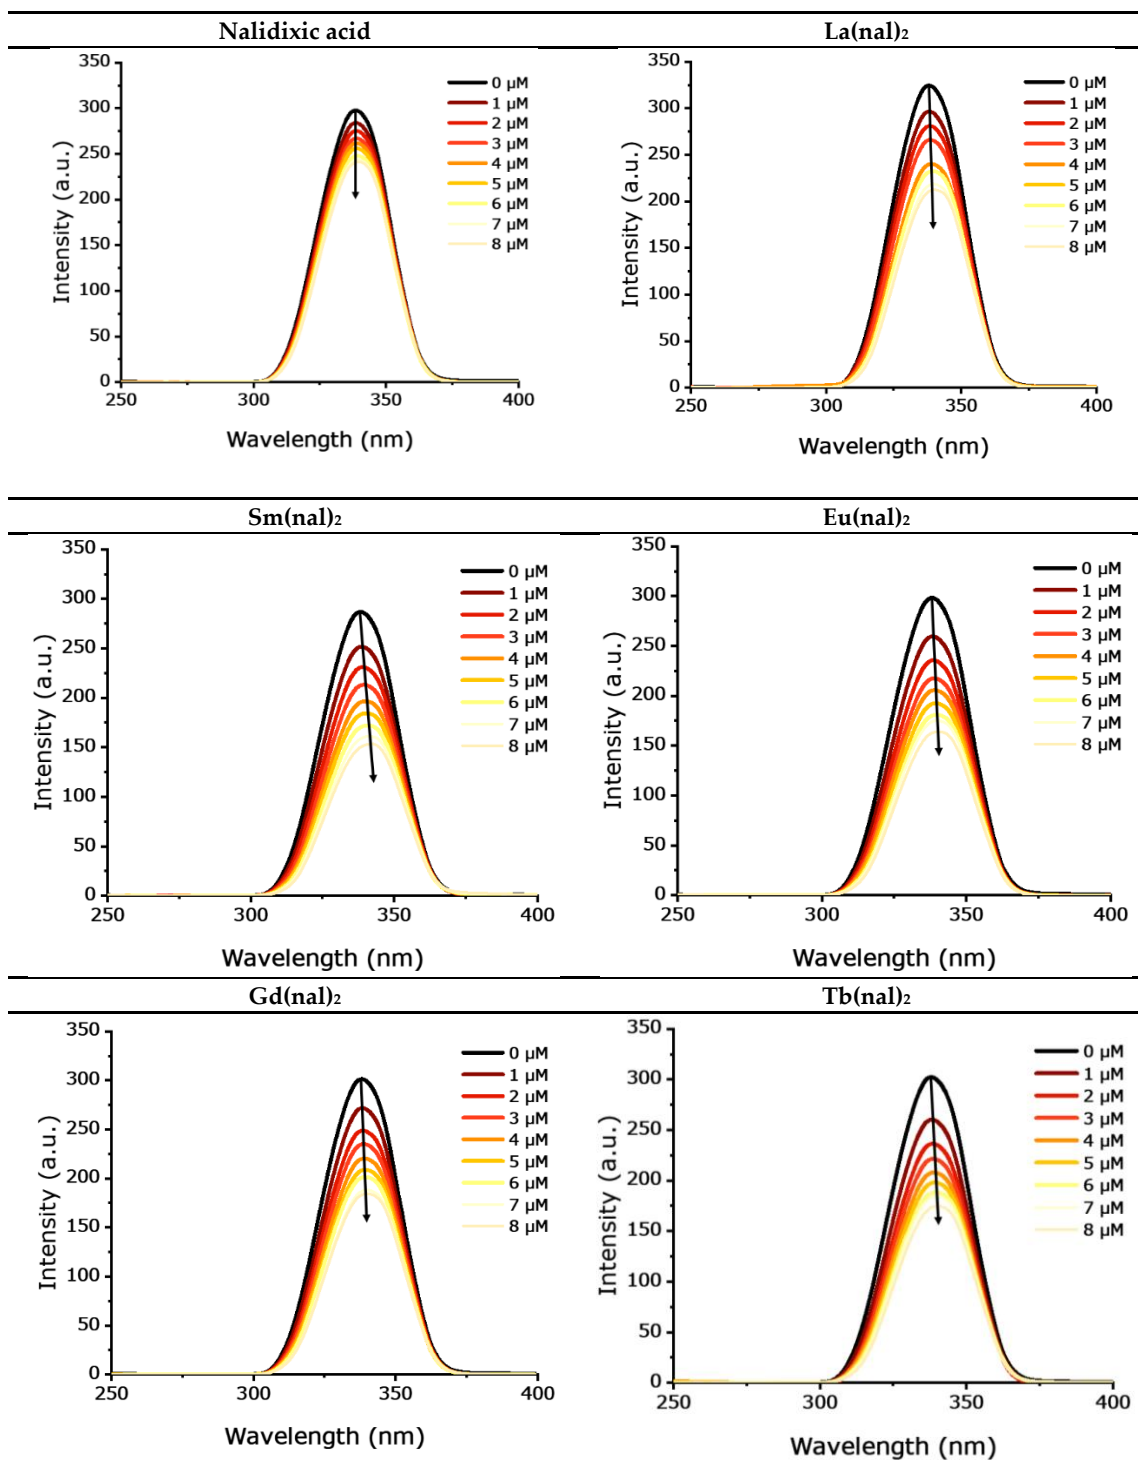

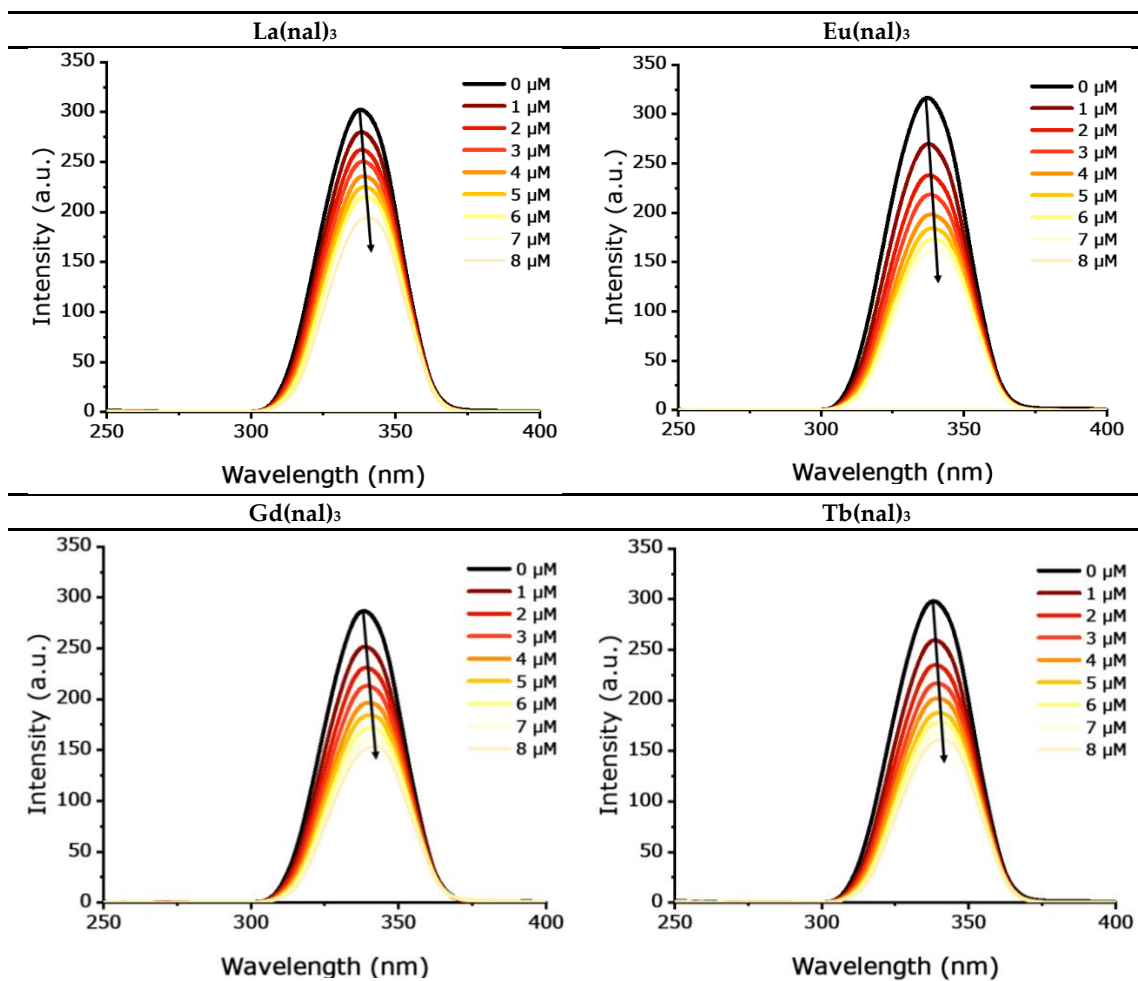

**Figure S27.** Synchronous spectra of the tested compounds - apo-Tf interaction systems recorded at  $\Delta\lambda=60$  nm. [apo-Tf] = 1  $\mu\text{M}$ , [compound] = 0, 1, 2, 3, 4, 5, 6, 7, 8  $\mu\text{M}$ .
